# Supplementary material
Source: PubMed Central journal article supplement (PMC5923033)
Supplement: NIHMS958808-supplement-Supplement.pdf [file NIHMS958808-supplement-Supplement.pdf]

## Supplementary material

Estimating local costs associated with *Clostridium difficile* infection using machine learning and electronic medical records

### Authors

Theodore R. Pak, PhD,<sup>a</sup> Kieran Chacko, BA, BSc,<sup>a</sup> Timothy O'Donnell, BS,<sup>a</sup> Shirish Huprikar, MD,<sup>b</sup> Harm van Bakel, PhD,<sup>a</sup> Andrew Kasarskis, PhD,<sup>a#</sup> and Erick R. Scott, MD, MHS<sup>a</sup>

# Corresponding author: Andrew Kasarskis, Icahn Institute and Department of Genetics and Genomic Sciences, Icahn School of Medicine at Mount Sinai, One Gustave L. Levy Place, Box 1498, New York, NY 10029, USA; telephone, +1 (212) 659-8542; email [andrew.kasarskis@mssm.edu](mailto:andrew.kasarskis@mssm.edu)

Alternate corresponding author: Theodore Pak, Icahn Institute and Department of Genetics and Genomic Sciences, Icahn School of Medicine at Mount Sinai, One Gustave L. Levy Place, Box 1498, New York, NY 10029, USA; telephone, +1 (212) 659-8314; email [theodore.pak@icahn.mssm.edu](mailto:theodore.pak@icahn.mssm.edu)

---

<sup>a</sup> Icahn Institute and Department of Genetics and Genomic Sciences, Icahn School of Medicine at Mount Sinai, New York, NY

<sup>b</sup> Division of Infectious Diseases, Department of Medicine, Icahn School of Medicine at Mount Sinai, New York, NY

## Supplementary text

**Supplementary methods.** Details of propensity model development, matching, evaluation of matching performance, and length of stay comparisons.

Propensity models for *Clostridium difficile* infection (CDI) based on the five case definitions were trained using logistic regression with elastic net regularization. The  $\alpha$  hyper-parameter, controlling the ratio of L1 to L2 penalties, was empirically selected on models fit for the first case definition via grid search, maximizing mean area under the receiver operating characteristic curve (AUROC) under five-fold nested cross validation (all values for  $\alpha \leq 0.1$  produced equivalent AUROCs) and checking for effective shrinkage of coefficients (to within one-fifth of the size of the simplest model). This resulted in selecting  $\alpha = 0.03$ . The  $\lambda$  hyper-parameter, controlling overall penalization for model size, was empirically selected for each modeled case definition by maximizing mean AUROC under five-fold cross validation (Figure S6). Nested cross validation while selecting  $\lambda$  was used to evaluate AUROC, while the final propensity models were allowed to see the entire training dataset. 100 bootstrap resampling runs were used to estimate the 95% AUROC confidence interval (CI). The AUROC varied only slightly between case definitions (Figure S3): (i) by ICD-9 code, 0.81 (95% confidence interval [CI], 0.79–0.83); (ii) by positive toxin EIA, 0.76 (95% CI, 0.74–0.78), (iii) by positive toxin PCR, 0.84 (95% CI, 0.82–0.85), (iv) by either toxin assay, 0.81 (95% CI, 0.80–0.82); (v) by any of these, 0.82 (95% CI, 0.81–0.83). Since propensity models were intended to fairly assess risk at admission for CDI across both cases and controls, variables that could reflect workup or treatment of CDI (as opposed to pre-existing risk) were masked (Table S1). A board-certified infectious diseases physician reviewed the final set of variables selected by each model after regularization (Table S2) to ensure that none of them reflected medical sequelae of CDI as opposed to potential risk factors. The number of selected variables in each model ranged from 373 to 1,027 (Table S2).

Matching (1:1) on the propensity score was performed without replacement of controls using a nearest neighbor-matching algorithm and a caliper of 0.2 standard deviations of the logit of the propensity score,<sup>1</sup> after exact matching on gender and age divided into six ranges. To assess the performance of the matching, we calculated standardized mean differences<sup>2</sup> for age and gender (Table 1), for which a

difference between  $-0.1$  and  $0.1$  is generally considered negligible,<sup>3</sup> and examined the distributions of the propensity scores between matched groups (Figure S5). Furthermore, to ensure that propensity matching itself does not cause spurious changes in the outcome variable (LOS), we repeated the matching algorithm using the matched controls against remaining unmatched controls, creating a “matched-again” control cohort, with the expectation that re-matching controls should not, by itself, create significant differences in the outcome variable.

For each case definition of CDI, differences of the median length of stay (LOS) between cases and matched controls were calculated and 95% CIs were calculated from 10,000 bootstrap resampling runs. The minimum LOS was specified as 0.1 days (2.4 hours), with smaller values rounded up to this value. Statistical significance of differences in LOS was determined using two-sided Mann-Whitney  $U$  tests.  $P$  values for all contrasts reported in Figures 2 and 3 are conservatively Bonferroni-corrected for the full number of hypotheses (24). Kaplan-Meier plots were generated to examine the nonparametric maximum likelihood estimation for risk of discharge from the hospital between cases and matched controls, and 95% CIs for these plots were derived from log-transformed standard errors.

To examine whether changes in LOS may have depended on the time of CDI onset, we repeated the above analysis for case definition (iv) stratified by the time of the first positive toxin assay result, using three ranges: 0-3 days, 3-8 days, and  $\geq 8$  days. Propensity models were again fitted to each of these case cohorts for matching as described previously, with the added condition that controls discharged before the start of the CDI time window were ineligible for matching, effectuating simplified balanced risk set matching.<sup>4</sup> To assess matching performance, propensity score distributions for each group were examined once more, and LOS was analyzed similarly to the original five case definitions.

To further characterize dependence of LOS on the time of CDI onset, we fit a nonparametric multistate model consistent with previous studies.<sup>5-7</sup> The model has two transient states (admitted-uninfected and admitted-infected) and one absorbing state (discharged); each patient starts in the admitted-uninfected state. Figure 4A is a diagram of all allowed transitions. For all case definitions with a diagnosis time (ii, iii, and iv), an Aalen-Johansen estimator was used on the full, unmatched dataset to calculate time-varying hazards of each transition. Since the estimator is sensitive to regions with sparsity or outliers, the minimum LOS was specified as 1 day, the time of CDI diagnosis was left- or right-shifted to

at least 0.5 days from admission and discharge events, and the model was computed to a precision of 0.1 day up to the 99<sup>th</sup> percentile LOS value (38.9, 41.9, and 40.9 days for case definitions ii, iii, and iv, respectively). The mean excess LOS was then estimated as the average difference in LOS between patients with and without CDI at each time  $t$ , weighted by the distribution of times spent in the uninfected state. Robust 95% CIs were generated from 1,000 bootstrap resampling runs.

Analyses were performed in R 3.2.2 (R Foundation for Statistical Computing, Vienna, Austria) using the *glmnet*,<sup>8</sup> *ROCR*,<sup>9</sup> *MatchIt*,<sup>10</sup> *survival*, and *etm*<sup>11</sup> packages.

## References

1. Austin PC. Optimal caliper widths for propensity-score matching when estimating differences in means and differences in proportions in observational studies. *Pharm Stat.* 2011;10(2):150-161. doi:10.1002/pst.433.
2. Austin PC. An Introduction to Propensity Score Methods for Reducing the Effects of Confounding in Observational Studies. *Multivariate Behav Res.* 2011;46(3):399-424. doi:10.1080/00273171.2011.568786.
3. Haukoos JS, Lewis RJ. The Propensity Score. *JAMA.* 2015;314(15):1637-8. doi:10.1001/jama.2015.13480.
4. Li YP, Propert KJ, Rosenbaum PR. Balanced Risk Set Matching. *J Am Stat Assoc.* 2001;96(October 2014):870-882. doi:10.1198/016214501753208573.
5. Mitchell BG, Gardner A, Barnett AG, Hiller JE, Graves N. The prolongation of length of stay because of Clostridium difficile infection. *Am J Infect Control.* 2014;42(2):164-167. doi:10.1016/j.ajic.2013.07.006.
6. Stevens VW, Khader K, Nelson RE, et al. Excess Length of Stay Attributable to Clostridium difficile Infection (CDI) in the Acute Care Setting: A Multistate Model. *Infect Control Hosp Epidemiol.* 2015;36(Cdi):1-7. doi:10.1017/ice.2015.132.
7. van Kleef E, Green N, Goldenberg SD, et al. Excess length of stay and mortality due to Clostridium difficile infection: A multi-state modelling approach. *J Hosp Infect.* 2014;88(4):213-217. doi:10.1016/j.jhin.2014.08.008.
8. Friedman J, Hastie T, Tibshirani R. Regularization Paths for Generalized Linear Models via Coordinate Descent. *J Stat Softw.* 2010;33(1):1-11. doi:10.18637/jss.v033.i01.
9. Sing T, Sander O, Beerenwinkel N, Lengauer T. ROCR: Visualizing classifier performance in R. *Bioinformatics.* 2005;21(20):3940-3941. doi:10.1093/bioinformatics/bti623.
10. Ho DE, Imai K, King G, Stuart EA. MatchIt: Nonparametric Preprocessing for Parametric Causal Inference. *J Stat Softw.* 2011;42(8):1-28. doi:10.18637/jss.v042.i08.
11. Allignol A, Schumacher M, Beyersmann J. Empirical Transition Matrix of Multi-State Models: The etm Package. *J Stat Softw.* 2011;38(4):1-15. doi:10.18637/jss.v038.i04.

## Supplementary figures

**Figure S1.**

**Caliper sizes used for matching cases for each CDI case definition.**

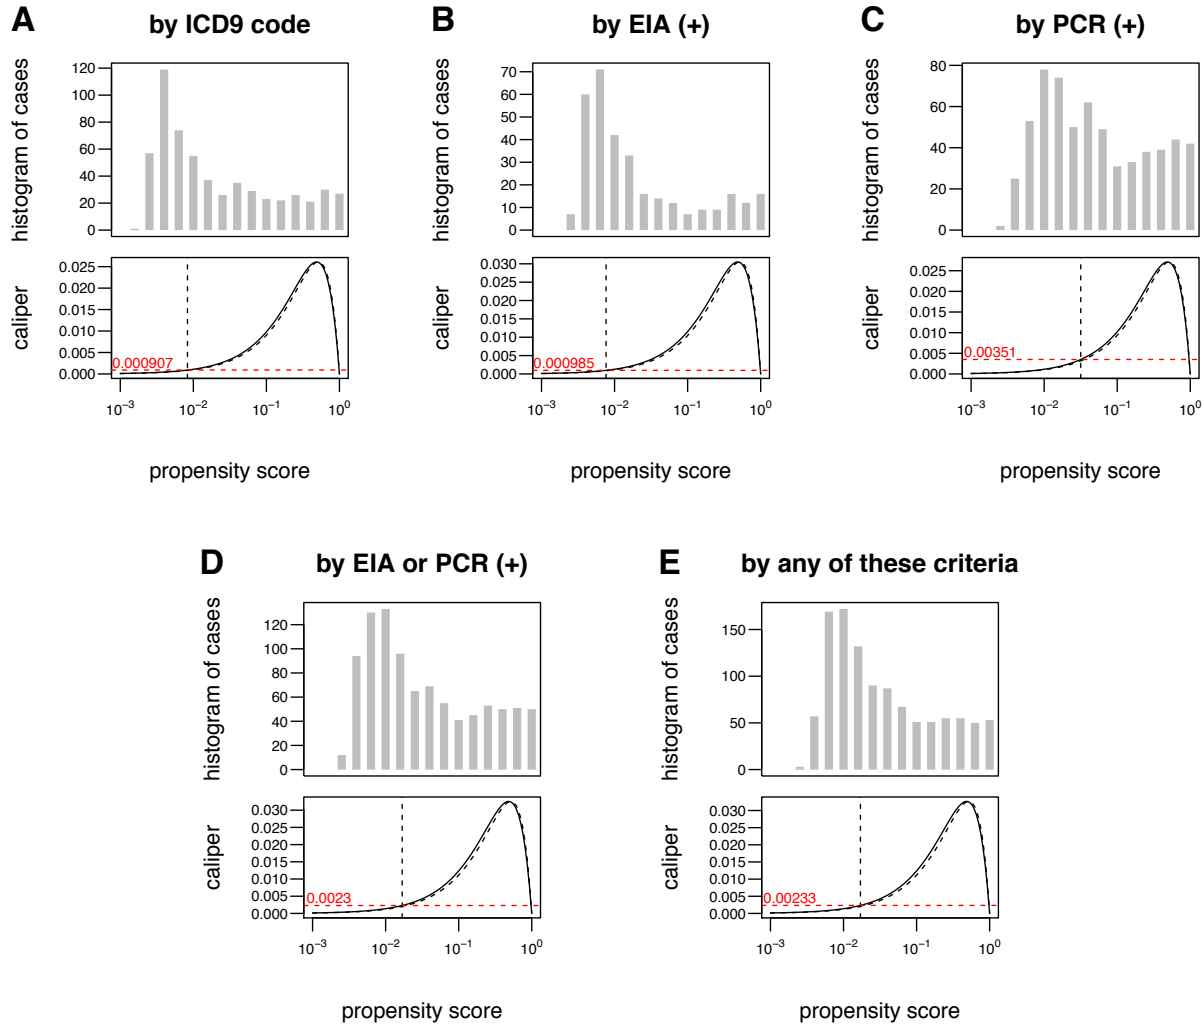

A-E, histograms of propensity score distributions for case cohorts as defined by each of the five CDI case definitions (top panels) compared with the size of the calipers used (bottom panels) for each corresponding unscaled propensity score. Unlike Figures S4 and S5, the X axes are  $\log_{10}$  probability scaled, not logit (log odds) scaled. Because calipers are applied during matching *after* logit-scaling of the propensity score (see Methods), the size of the caliper changes along the 0–1 range of the unscaled propensity score. The solid curve indicates the width of the upper caliper, and the dashed curve indicates the width of the lower caliper. The vertical dashed line indicates the median propensity score among the cases, and the horizontal red line indicates the size of the upper caliper at the median propensity score, represented as units of an unscaled probability.

**Figure S2.**  
**Violation of the proportional hazards assumption for the ICD-9 code case definition.**

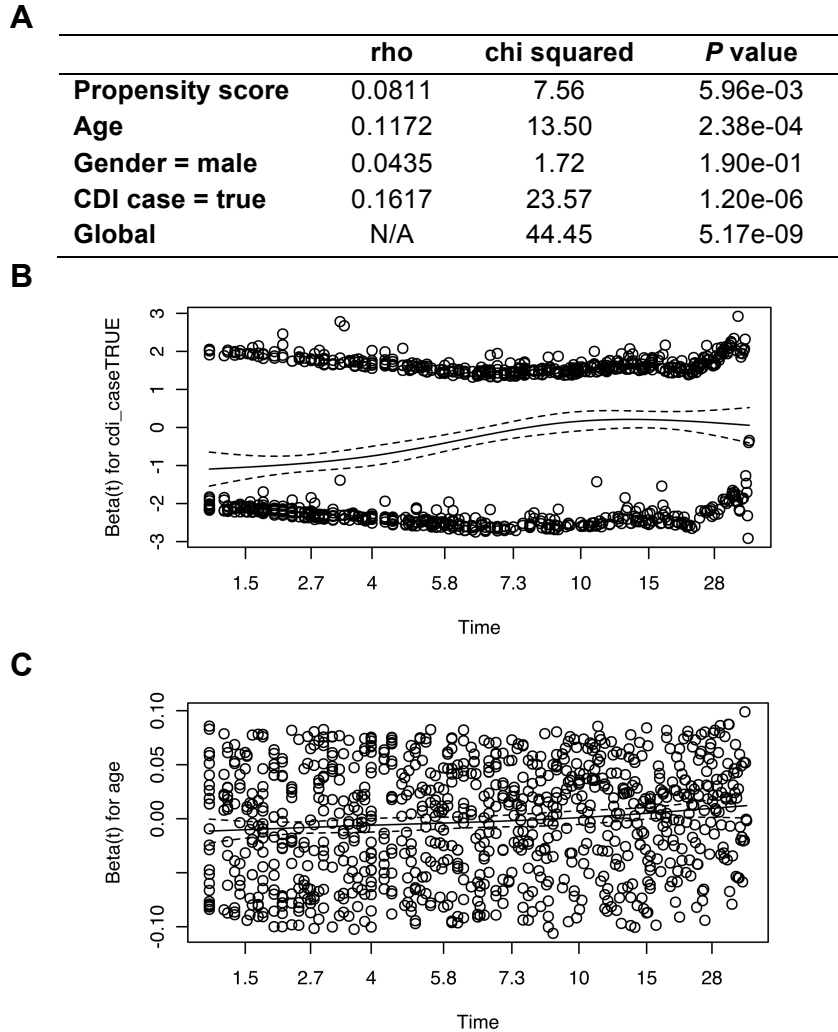

A, Table of summary statistics from scaled Schoenfeld residuals regressed against time transformation (individual covariates) and a global test of the proportional hazards assumption, using the R function *cox.zph* with a *transform* parameter of function(t)  $\log(t+50)$ . Propensity score, age, *Clostridium difficile* case status, and the global model violate the proportional hazards assumption. B, plot of the scaled Schoenfeld residuals for *Clostridium difficile* case status by transformed time. Solid line: smoothing spline; dotted lines: 2 standard errors. The zero proportional hazards assumption would require that the fitted spline resembles a straight horizontal line. C, plot as in B but of residuals for age by transformed time.

**Figure S3.**  
**Receiver operator characteristic curves for CDI propensity models.**

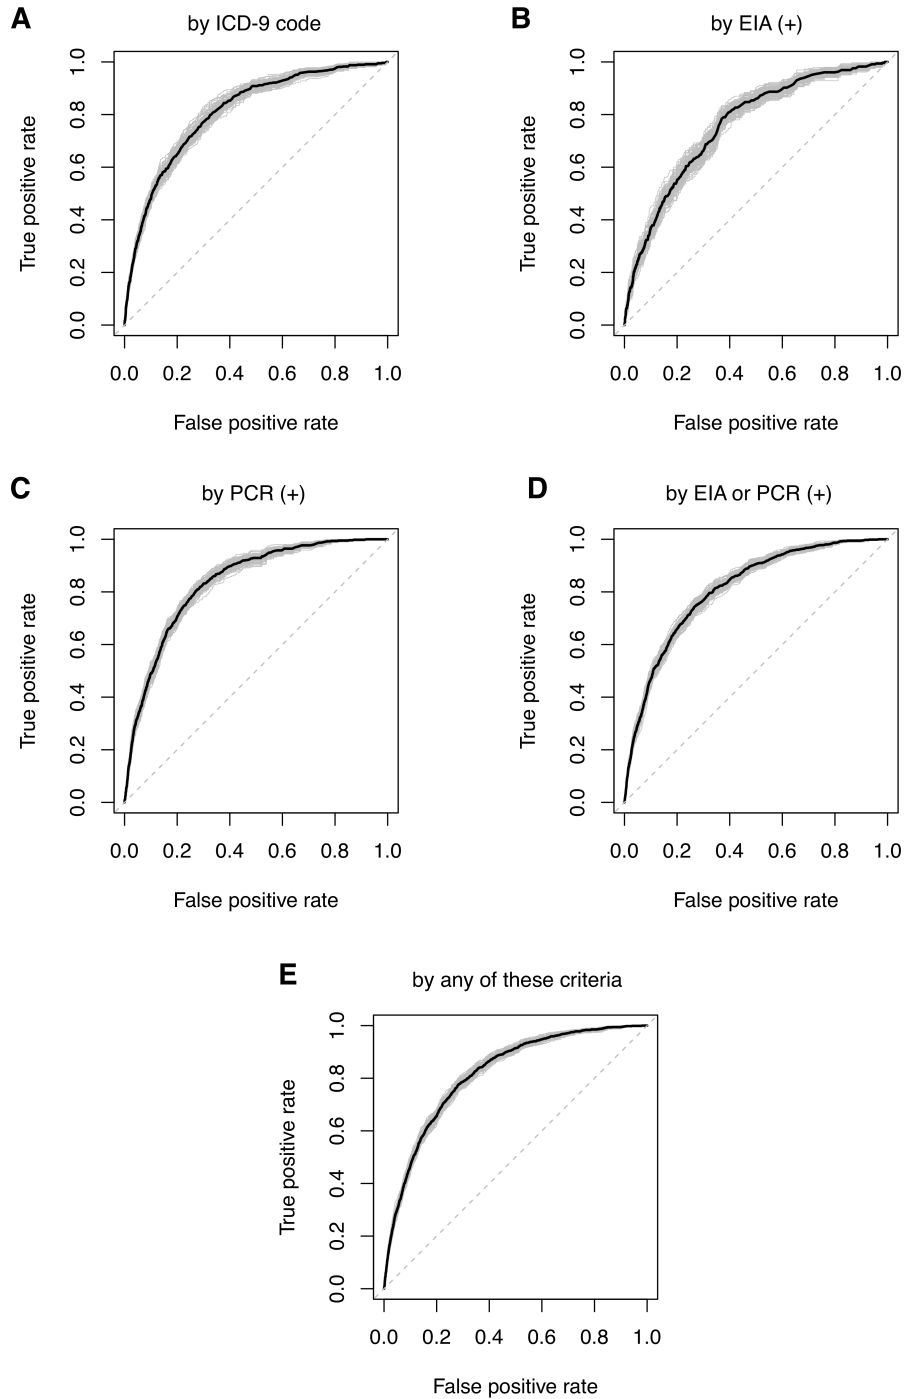

A-E, receiver operator characteristic (ROC) curve comparing the true positive rate against the false positive rate for every possible cutoff of the propensity score, for each of the five CDI case definitions. ROCs are only measured on test data not used to train the models, under five-fold cross validation. Light grey lines indicate ROCs for 100 bootstrap samples. Area under each ROC is reported in Supplementary Methods. CDI, *Clostridium difficile* infection.

**Figure S4.**  
**Propensity score distributions for matched cohorts for each CDI case definition**

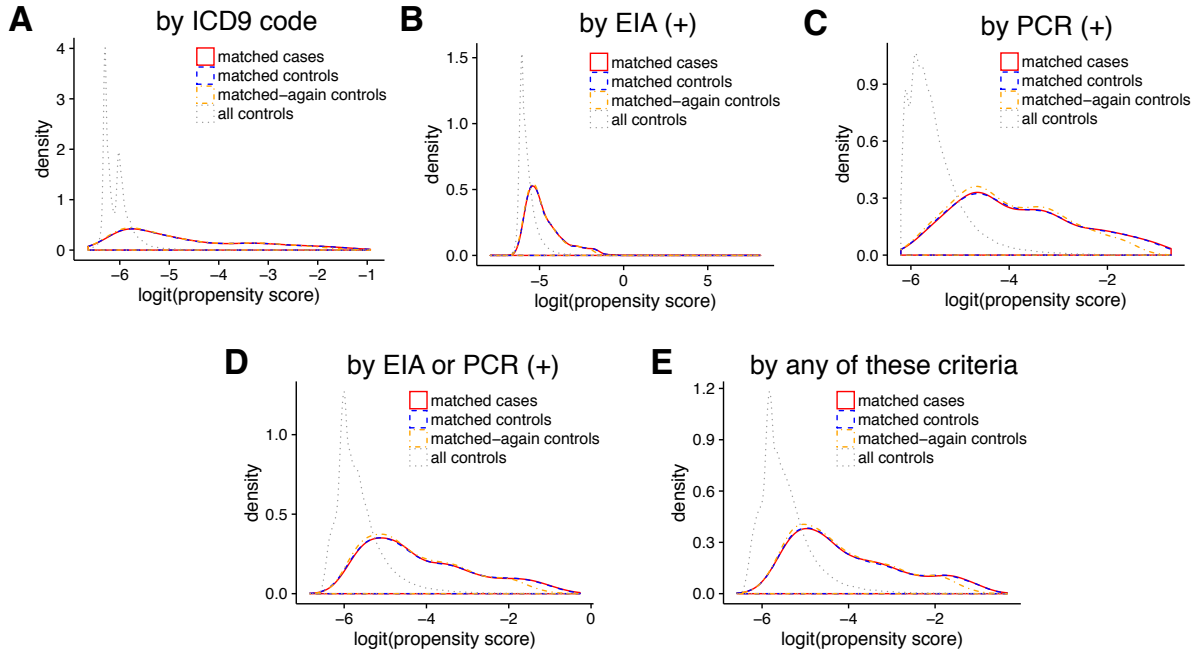

A-E, density plots of propensity score distributions for matched cases, matched controls, matched-again controls, and all controls for each of the five CDI case definitions. Matched-again controls are derived from a second round of matching between the case-matched controls from the first round of matching and remaining unmatched controls. All X axes are logit-scaled. All Y axes are scaled to unit probabilities; the area under every curve equals 1. The matching algorithm intends to align the propensity score distributions for all of the matched groups.



**Figure S5.**  
**Propensity score distributions for matched cohorts stratified by time of CDI diagnosis**

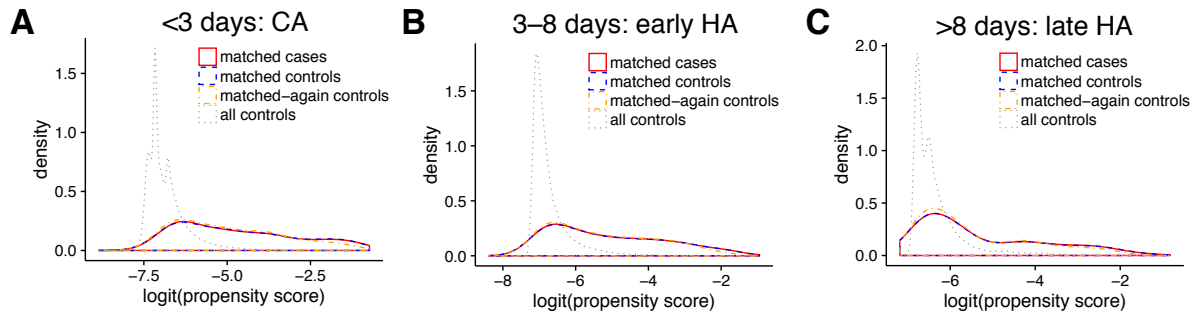

A-C, density plots of propensity score distributions for matched cases, matched controls, matched-again controls, and all controls for cases defined by any positive toxin assay, stratified by the time to infection. Matched-again controls are derived from a second round of matching between the case-matched controls from the first round of matching and remaining unmatched controls. All X axes are logit-scaled. All Y axes are scaled to unit probabilities; the area under every curve equals 1. The matching algorithm intends to align the propensity score distributions for all of the matched groups.

**Figure S6.**  
**Empirical selection of the regularization penalty hyper-parameter lambda.**

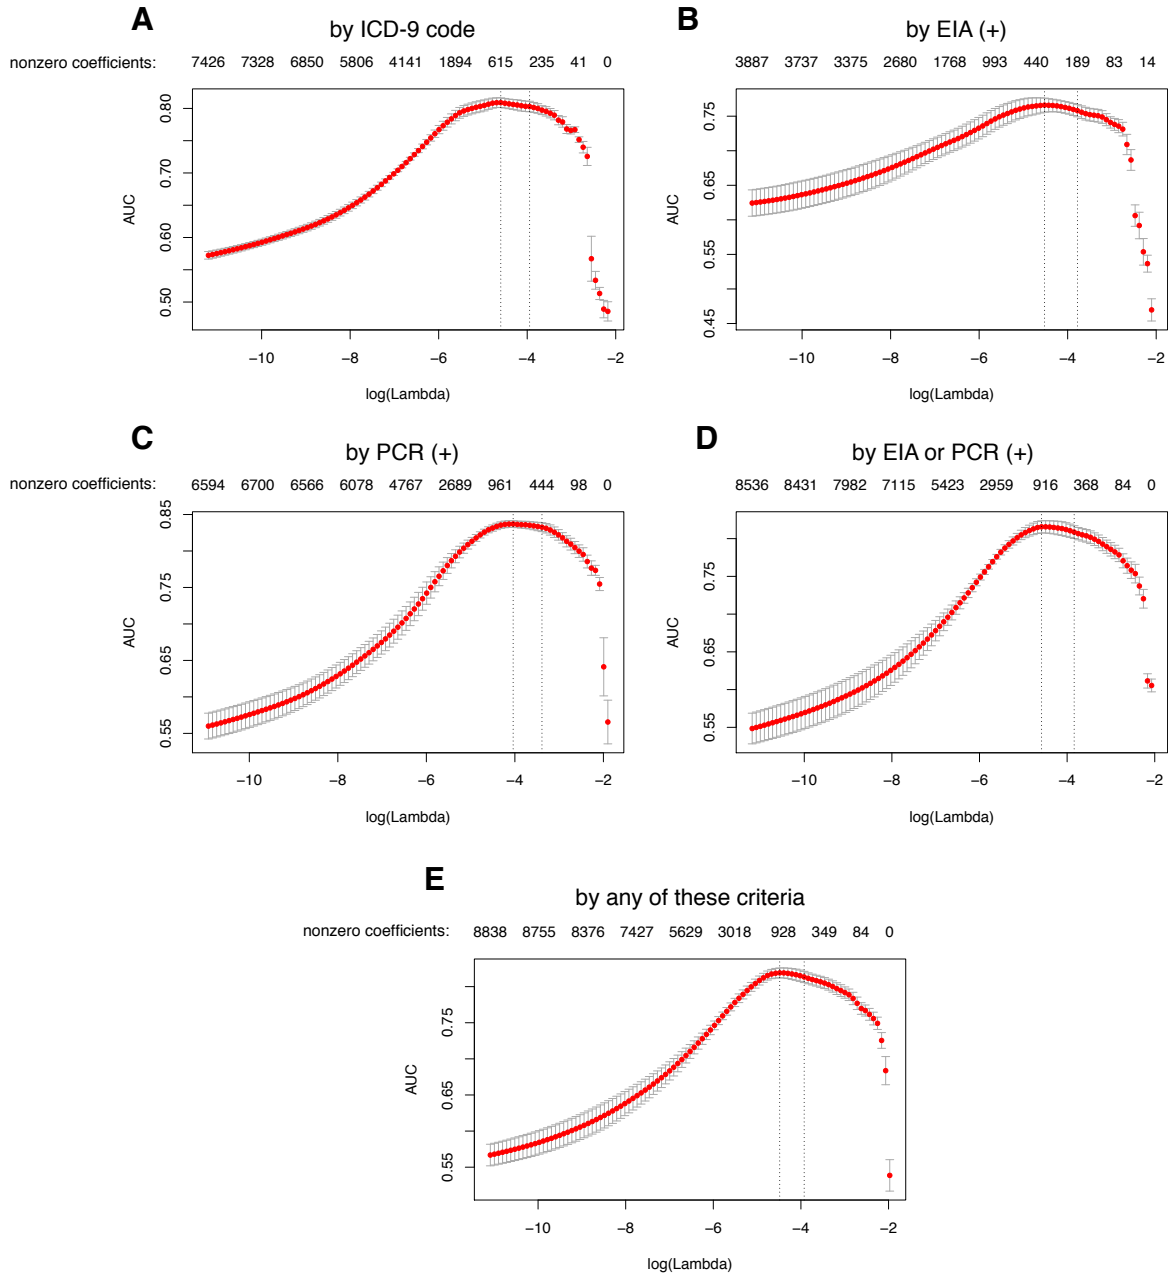

A-E, mean area under the receiver operating characteristic curve (AUC) vs.  $\log(\lambda)$  for each of the case definitions for *Clostridium difficile* infection, based on five-fold cross-validation. As the  $\log(\lambda)$  penalty hyper-parameter increases, the number of variables left in the model (i.e., with nonzero coefficients) decreases; these are listed across the top of each plot. Vertical bars indicate standard errors. The  $\log(\lambda)$  value with maximal mean AUC and the  $\log(\lambda)$  value with mean AUC within 1 standard deviation of the maximum are highlighted by vertical dashed lines; the former was used for the final propensity models.

## Supplementary tables

**Table S1. Variables closely correlated with *Clostridium difficile* infection workup or treatment that were excluded for propensity modeling**

| Variable                 | Description                                                            |
|--------------------------|------------------------------------------------------------------------|
| problem_list:008.45      | Intestinal infection due to <i>Clostridium difficile</i>               |
| abnormal_labs:4730       | C.DIFF. TOXIN B PCR                                                    |
| abnormal_labs:4647       | C.DIFF EIA                                                             |
| abnormal_labs:4647       | C.DIFF EIA TOXIN A&B                                                   |
| meds_administered:300025 | VANCOMYCIN ORAL LIQUID REPACKAGE ONLY - 125MG/2.5ML                    |
| meds_administered:63653  | VANCOMYCIN ORAL                                                        |
| meds_administered:8200   | VANCOMYCIN 125 MG CAP                                                  |
| meds_administered:14246  | VANCOMYCIN 250 MG/5 ML ORAL SOLUTION                                   |
| meds_administered:300092 | VANCOMYCIN ENEMA                                                       |
| meds_administered:13623  | VANCOMYCIN 250 MG CAP                                                  |
| meds_administered:5484   | METRONIDAZOLE 250 MG TAB                                               |
| meds_administered:54227  | METRONIDAZOLE ORAL                                                     |
| meds_administered:6870   | METRONIDAZOLE 500 MG TAB                                               |
| meds_administered:5484   | METRONIDAZOLE 250 MG TAB                                               |
| meds_administered:6295   | METRONIDAZOLE IN SODIUM CHLORIDE (ISO-OSM) 500 MG/100 ML IV PIGGY BACK |
| meds_administered:400648 | METRONIDAZOLE 250 MG/50 ML ISO-OSMOTIC SOLUTION                        |
| meds_administered:1527   | METRONIDAZOLE HCL 500 MG IV SOLUTION                                   |
| meds_administered:19702  | METRONIDAZOLE 375 MG CAP                                               |
| meds_administered:300009 | METRONIDAZOLE 50 MG/ML ORAL SUSP                                       |
| meds_administered:400660 | METRONIDAZOLE 750 MG/150 ML ISO-OSMOTIC SOLUTION                       |
| meds_reported:300025     | VANCOMYCIN ORAL LIQUID REPACKAGE ONLY - 125MG/2.5ML                    |
| meds_reported:63653      | VANCOMYCIN ORAL                                                        |
| meds_reported:8200       | VANCOMYCIN 125 MG CAP                                                  |
| meds_reported:14246      | VANCOMYCIN 250 MG/5 ML ORAL SOLUTION                                   |
| meds_reported:300092     | VANCOMYCIN ENEMA                                                       |
| meds_reported:13623      | VANCOMYCIN 250 MG CAP                                                  |
| meds_reported:5484       | METRONIDAZOLE 250 MG TAB                                               |
| meds_reported:54227      | METRONIDAZOLE ORAL                                                     |
| meds_reported:6870       | METRONIDAZOLE 500 MG TAB                                               |
| meds_reported:5484       | METRONIDAZOLE 250 MG TAB                                               |
| meds_reported:6295       | METRONIDAZOLE IN SODIUM CHLORIDE (ISO-OSM) 500 MG/100 ML IV PIGGY BACK |
| meds_reported:400648     | METRONIDAZOLE 250 MG/50 ML ISO-OSMOTIC SOLUTION                        |
| meds_reported:1527       | METRONIDAZOLE HCL 500 MG IV SOLUTION                                   |
| meds_reported:19702      | METRONIDAZOLE 375 MG CAP                                               |
| meds_reported:300009     | METRONIDAZOLE 50 MG/ML ORAL SUSP                                       |

| <b>Variable</b>      | <b>Description</b>                                                                                               |
|----------------------|------------------------------------------------------------------------------------------------------------------|
| meds_reported:400660 | METRONIDAZOLE 750 MG/150 ML ISO-OSMOTIC SOLUTION                                                                 |
| problem_list:041.84  | Other specified bacterial infections in conditions classified elsewhere and of unspecified site, other anaerobes |
| problem_list:V07.0   | Need for isolation                                                                                               |
| problem_list:V02.3   | Carrier or suspected carrier of other gastrointestinal pathogens                                                 |
| problem_list:787.91  | Diarrhea                                                                                                         |

Raw data for this table are available in tab-separated values format from Figshare at doi:10.6084/m9.figshare.4311695

Abbreviation: C.DIFF, *Clostridium difficile*; PCR, polymerase chain reaction; EIA, enzyme immunoassay; CAP, caplet; TAB, tablet; ISO-OSM, iso-osmotic; IV, intravenous; SUSP, suspension

**Table S2. Non-zero coefficients (selected variables) for *Clostridium difficile* infection propensity models after regularization**

Raw data for this table are available in tab-separated values format from Figshare at doi:10.6084/m9.figshare.4311695

Notes: Blank cells indicate the variable was not selected for the model. Variables not selected for any of the models are not included in this table. All variables are boolean, denoting presence or absence, except for “age,” which is continuous and expressed in years. The natural exponent of each coefficient is the modeled odds ratio per unit of the corresponding variable.

| Variable                   | Description                                                                               | Model coefficients for each case definition |            |            |                |                 |
|----------------------------|-------------------------------------------------------------------------------------------|---------------------------------------------|------------|------------|----------------|-----------------|
|                            |                                                                                           | by ICD-9 code                               | by EIA (+) | by PCR (+) | EIA or PCR (+) | by any of these |
| problem_list:209.26        | Malignant carcinoid tumor of midgut, not otherwise specified                              | 7.608                                       | 6.645      |            | 6.769          | 6.639           |
| meds_reported:96857        | CEFTAROLINE FOSAMIL 600 MG INTRAVENOUS SOLUTION                                           | 7.195                                       |            | 5.430      | 6.243          | 6.091           |
| meds_administered:4074     | PROMETHAZINE 6.25 MG/5 ML SYRUP                                                           | 6.801                                       |            | 5.973      | 6.428          | 6.309           |
| meds_reported:1692         | DIOVAN HCT 80 MG-12.5 MG TAB                                                              | 6.761                                       | 3.508      |            | 5.413          | 5.289           |
| meds_administered:65996    | HEPATITIS B IMMUNE GLOBULIN-MALTOSE >312 UNIT/ML (5 ML) INJECTION SOLN                    | 6.678                                       |            | 5.826      | 6.290          | 6.060           |
| abnormal_labs:4311-BACT Ag | ST.PNEUMO.                                                                                | 6.512                                       |            | 5.355      | 5.874          | 5.701           |
| meds_reported:95567        | GLUCAGON (HUMAN RECOMBINANT) 1 MG/ML SOLUTION FOR INJECTION                               | 6.367                                       |            | 4.531      | 5.262          | 5.104           |
| problem_list:477.1         | Allergic rhinitis due to food                                                             | 6.358                                       |            | 3.041      | 6.468          | 6.049           |
| (Intercept)                |                                                                                           | -6.147                                      | -5.996     | -5.807     | -5.995         | -5.751          |
| meds_reported:19850        | CIPROFLOXACIN 10 MG/ML IV                                                                 | 6.091                                       |            | 5.268      | 5.645          | 5.324           |
| meds_reported:37860        | HALOPERIDOL 5 MG/ML IM SYRINGE                                                            | 6.024                                       |            | 5.354      | 5.670          | 5.570           |
| meds_reported:26285        | NUT.TX.GLUC.INTOL,LAC-FREE,REG ORAL LIQUID                                                | 5.798                                       |            | 4.379      | 4.524          | 5.029           |
| meds_reported:77795        | HYDROMORPHONE (PF) INJ                                                                    | 5.461                                       |            |            |                | 4.945           |
| meds_reported:46547        | DAILY MULTIPLE VITAMINS/IRON ORAL                                                         | 5.272                                       |            | 4.275      | 4.373          | 4.341           |
| meds_reported:44687        | CEFTIN ORAL                                                                               | 5.084                                       |            | 4.401      | 4.854          | 4.629           |
| problem_list:536.49        | Other gastrostomy complications                                                           | 4.909                                       |            | 5.653      | 6.145          | 5.877           |
| problem_list:839.00        | Closed dislocation, cervical vertebra, unspecified                                        | 4.800                                       |            | 4.637      | 5.489          | 4.462           |
| problem_list:730.21        | Unspecified osteomyelitis, shoulder region                                                | 4.689                                       |            | 6.209      | 4.417          | 4.297           |
| meds_reported:19525        | PSEUDOEPHEDRINE 30 MG CAP                                                                 | 4.658                                       |            | 4.257      | 4.725          | 4.249           |
| problem_list:491.8         | Other chronic bronchitis                                                                  | 4.550                                       | 7.105      |            | 4.243          | 4.009           |
| problem_list:374.34        | Blepharochalasis                                                                          | 4.544                                       |            | 4.766      | 4.308          | 4.131           |
| problem_list:756.17        | Spina bifida occulta                                                                      | 4.481                                       |            |            |                | 4.248           |
| problem_list:364.41        | Hyphema of iris and ciliary body                                                          | 4.242                                       |            | 3.725      | 3.974          | 4.007           |
| meds_reported:64228        | VITRON-C ORAL                                                                             | 4.098                                       |            | 3.014      | 3.360          | 3.263           |
| meds_reported:6373         | LEVONORGESTREL-ETHINYL ESTRADIOL 0.15 MG-30 MCG TABLET                                    | 4.032                                       |            | 3.288      | 3.569          | 3.344           |
| problem_list:666.12        | Other immediate postpartum hemorrhage, delivered, with mention of postpartum complication | 4.020                                       |            | 3.308      | 3.885          | 3.698           |
| problem_list:201.50        | Hodgkin's disease, nodular sclerosis, unspecified site, extranodal and solid organ sites  | 4.000                                       |            | 2.808      | 3.216          | 3.078           |
| meds_reported:37763        | GALANTAMINE ER 16 MG 24 HR CAPSULE,EXTENDED RELEASE                                       | 3.936                                       |            | 2.627      | 2.820          | 2.914           |
| meds_reported:42030        | APIDRA SUBQ                                                                               | 3.935                                       |            | 3.388      | 3.492          | 3.263           |
| meds_reported:48350        | ENOXAPARIN SUBQ                                                                           | 3.822                                       |            | 2.707      | 2.889          | 2.708           |

| Variable                          | Description                                                                                                               | Model coefficients for each case definition |            |            |                |                 |
|-----------------------------------|---------------------------------------------------------------------------------------------------------------------------|---------------------------------------------|------------|------------|----------------|-----------------|
|                                   |                                                                                                                           | by ICD-9 code                               | by EIA (+) | by PCR (+) | EIA or PCR (+) | by any of these |
| meds_reported:95777               | BUPRENORPHINE-NALOXONE 2 MG-0.5 MG SUBLINGUAL FILM                                                                        | 3.816                                       |            | 3.583      | 3.860          | 3.555           |
| meds_reported:39846               | B COMPLEX-VITAMIN C 100 MG-FOLIC ACID 1 MG TABLET                                                                         | 3.713                                       |            | 2.999      | 3.574          | 3.368           |
| surgery_cases:BONE MARROW HARVEST |                                                                                                                           | 3.710                                       |            |            |                | 3.347           |
| meds_administered:400916          | POTASSIUM CHLORIDE IV SYRINGE 0.1 MEQ/ML STERILE DIL                                                                      | 3.686                                       |            | 3.037      | 3.381          | 3.202           |
| meds_reported:56780               | OYSCO D ORAL                                                                                                              | 3.604                                       |            | 3.315      | 3.485          | 3.147           |
| meds_administered:400337          | GANCICLOVIR SYRINGE                                                                                                       | 3.575                                       |            | 3.007      | 3.289          | 3.130           |
| problem_list:203.10               | Plasma cell leukemia, without mention of having achieved remission                                                        | 3.571                                       |            | 1.753      | 1.958          | 3.158           |
| problem_list:999.33               | Local infection due to central venous catheter                                                                            | 3.554                                       |            | 2.930      | 3.135          | 3.080           |
| meds_reported:13640               | AMOXAPINE 100 MG TABLET                                                                                                   | 3.486                                       |            |            |                | 3.059           |
| problem_list:556.0                | Ulcerative (chronic) enterocolitis                                                                                        | 3.454                                       |            | 3.019      | 3.057          | 2.866           |
| meds_reported:9858                | OFLOXACIN 0.3 % EAR DROPS                                                                                                 | 3.392                                       |            |            |                | 2.697           |
| meds_administered:3866            | AMOXAPINE 50 MG TABLET                                                                                                    | 3.380                                       |            |            |                | 2.990           |
| problem_list:727.82               | Calcium deposits in tendon and bursa                                                                                      | 3.311                                       |            | 2.593      | 3.071          | 3.062           |
| problem_list:277.02               | Cystic fibrosis with pulmonary manifestations                                                                             | 3.297                                       |            | 3.225      | 3.665          | 3.554           |
| problem_list:529.0                | Glossitis                                                                                                                 | 3.267                                       |            |            |                | 2.871           |
| meds_reported:36581               | CEFTAZIDIME 2 GRAM/50 ML IN DEXTROSE (ISO-OSM) INTRAVENOUS PIGGYBACK                                                      | 3.250                                       |            |            |                | 3.164           |
| abnormal_labs:2112-HGB C          |                                                                                                                           | 3.249                                       |            | 3.411      | 3.245          | 3.041           |
| meds_reported:25233               | PROTEIN SUPPLEMENT ORAL PACKET                                                                                            | 3.240                                       |            | 2.788      | 1.897          | 1.837           |
| meds_reported:971                 | THALIDOMIDE 50 MG CAPSULE                                                                                                 | 3.239                                       |            | 3.886      | 3.492          | 3.132           |
| problem_list:310.1                | Personality change due to conditions classified elsewhere                                                                 | 3.237                                       |            | 2.840      | 2.531          | 2.498           |
| problem_list:333.5                | Other choreas                                                                                                             | 3.229                                       |            | 3.205      | 2.996          | 2.746           |
| meds_reported:19143               | AZTREONAM 2 GRAM/50 ML IN DEXTROSE (ISO-OSMOTIC) INTRAVENOUS PIGGYBACK                                                    | 3.212                                       |            |            |                | 3.058           |
| problem_list:040.0                | Gas gangrene                                                                                                              | 3.183                                       |            | 3.032      | 2.983          | 2.570           |
| problem_list:461.0                | Acute maxillary sinusitis                                                                                                 | 3.171                                       |            |            |                | 2.410           |
| problem_list:681.02               | Onychia and paronychia of finger                                                                                          | 3.146                                       |            | 3.624      | 2.631          | 2.389           |
| meds_reported:54995               | MVI, ADULT NO.1 WITH VIT K IV                                                                                             | 3.140                                       |            | 2.590      | 2.285          | 2.299           |
| meds_reported:101627              | METOCLOPRAMIDE HCL INJ                                                                                                    | 3.140                                       |            | 2.291      | 2.678          | 2.606           |
| meds_administered:23972           | GEL DRESSING TOPICAL                                                                                                      | 3.132                                       |            | 1.630      | 2.029          | 1.786           |
| meds_reported:14104               | UREA 10 % TOPICAL CREAM                                                                                                   | 3.109                                       |            | 2.838      | 2.679          | 2.490           |
| meds_administered:1388            | ANAGRELIDE 0.5 MG CAP                                                                                                     | 3.101                                       |            | 1.909      | 1.915          | 1.781           |
| meds_reported:6450                | TOBRAMYCIN-DEXAMETHASONE 0.3 %-0.1 % EYE OINTMENT                                                                         | 3.095                                       |            | 2.346      | 2.623          | 2.271           |
| surgery_cases:EXAMINATION         | UNDER ANES PELVIC                                                                                                         | 3.089                                       | 3.943      |            | 2.905          | 2.569           |
| meds_reported:5744                | PERINDOPRIL ERBUMINE 4 MG TABLET                                                                                          | 3.082                                       |            |            | 2.479          | 2.354           |
| meds_reported:46119               | CORTIFOAM RECT                                                                                                            | 3.055                                       |            | 3.480      | 3.787          | 2.890           |
| meds_reported:39806               | COD LIVER OIL-VITAMINS A & D-PETROLATUM 96 % TOPICAL OINTMENT                                                             | 3.011                                       |            | 2.806      | 2.627          | 2.433           |
| meds_reported:36406               | CIPROFLOXACIN 400 MG/40 ML IV                                                                                             | 2.972                                       |            |            |                | 2.757           |
| meds_reported:18631               | CLOBETASOL 0.05 % TOPICAL SOLN                                                                                            | 2.887                                       |            |            |                | 2.507           |
| problem_list:281.3                | Other specified megaloblastic anemias not elsewhere classified                                                            | 2.854                                       |            | 5.220      | 2.461          | 2.248           |
| problem_list:E888.1               | Fall resulting in striking against other object                                                                           | 2.836                                       |            | 2.625      | 2.404          | 2.284           |
| problem_list:238.2                | Neoplasm of uncertain behavior of skin                                                                                    | 2.829                                       | 3.715      |            | 2.550          | 2.254           |
| meds_reported:44569               | CARTIA XT ORAL                                                                                                            | 2.773                                       |            |            |                | 1.926           |
| problem_list:041.04               | Streptococcus infection in conditions classified elsewhere and of unspecified site, streptococcus, group D [Enterococcus] | 2.750                                       |            | 1.870      | 2.429          | 1.954           |
| meds_reported:82974               | INSULIN PUMP SYRINGE 3 ML                                                                                                 | 2.711                                       |            | 2.116      | 2.293          | 2.118           |

| Variable                               | Description                                                                                                         | Model coefficients for each case definition |               |               |                   |                    |
|----------------------------------------|---------------------------------------------------------------------------------------------------------------------|---------------------------------------------|---------------|---------------|-------------------|--------------------|
|                                        |                                                                                                                     | by ICD-9<br>code                            | by EIA<br>(+) | by PCR<br>(+) | EIA or<br>PCR (+) | by any<br>of these |
| meds_reported:18020                    | DEXAMETHASONE 0.5 MG TAB                                                                                            | 2.684                                       |               | 0.429         | 0.772             | 1.817              |
| problem_list:078.89                    | Other specified diseases due to viruses                                                                             | 2.674                                       |               | 1.898         | 2.053             | 1.809              |
| problem_list:041.7                     | Pseudomonas infection in conditions<br>classified elsewhere and of unspecified<br>site                              | 2.660                                       |               |               |                   | 2.335              |
| meds_administered:2857                 | FUROSEMIDE 10 MG/ML ORAL SOLN                                                                                       | 2.651                                       |               |               |                   | 1.984              |
| meds_administered:4415                 | SODIUM CHLORIDE 3 % FOR<br>NEBULIZATION                                                                             | 2.606                                       |               | 0.928         | 1.034             | 0.853              |
| problem_list:533.9                     |                                                                                                                     | 2.600                                       | 2.405         |               | 1.784             | 1.722              |
| surgery_cases:ROUX-EN-Y CHOLEJEJU      |                                                                                                                     | 2.579                                       |               | 3.967         | 2.273             | 1.989              |
| meds_administered:18646                | LIDOCAINE HCL 5 % TOPICAL<br>OINTMENT                                                                               | 2.569                                       |               | 1.669         | 2.138             | 1.642              |
| problem_list:324.9                     | Intracranial and intraspinal abscess of<br>unspecified site                                                         | 2.556                                       |               |               |                   | 1.805              |
| problem_list:437.0                     | Cerebral atherosclerosis                                                                                            | 2.532                                       |               | 2.257         | 2.267             | 1.993              |
| problem_list:879.9                     | Open wound(s) (multiple) of unspecified<br>site(s), complicated                                                     | 2.528                                       |               | 1.508         | 2.024             | 1.903              |
| meds_reported:11530                    | MICONAZOLE NITRATE 2 % TOPICAL<br>OINTMENT                                                                          | 2.519                                       |               |               |                   | 1.381              |
| problem_list:173.62                    | Squamous cell carcinoma of skin of<br>upper limb, including shoulder                                                | 2.441                                       |               | 1.715         | 2.030             | 1.999              |
| meds_reported:3635                     | DOXEPIN 25 MG CAPSULE                                                                                               | 2.437                                       |               |               |                   | 1.577              |
| meds_administered:4860                 | PE-SHARK LIVER OIL-COCOA BUTTR<br>0.25 %-3 % RECTAL SUPPOSITORY                                                     | 2.432                                       |               | 1.662         | 2.280             | 2.104              |
| problem_list:628.2                     | Infertility, female, of tubal origin                                                                                | 2.411                                       |               | 2.216         | 2.366             | 2.012              |
| meds_reported:400340                   | NAFCILLIN 2 G IVPB                                                                                                  | 2.407                                       |               | 1.540         | 1.564             | 1.517              |
| meds_reported:5479                     | IPRATROPIUM BROMIDE 18<br>MCG/ACTUATION AEROSOL<br>INHALER                                                          | 2.404                                       |               | 3.290         | 2.786             | 2.612              |
| meds_administered:81991                | VITAMIN B COMPLEX                                                                                                   | 2.389                                       |               | 1.685         | 1.943             | 1.781              |
| meds_reported:55088                    | NADOLOL ORAL                                                                                                        | 2.384                                       | 3.002         | 0.632         | 1.735             | 1.608              |
| problem_list:753.9                     | Unspecified anomaly of urinary system                                                                               | 2.383                                       |               | 2.268         | 2.048             | 1.779              |
| problem_list:243                       | Congenital hypothyroidism                                                                                           | 2.369                                       |               | 1.266         | 1.160             | 1.124              |
| problem_list:359.4                     | Toxic myopathy                                                                                                      | 2.365                                       | 5.048         |               | 2.087             | 1.843              |
| meds_administered:102733               | ELVITEGRAV 150 MG-COBICIST 150<br>MG-EMTRICIT 200 MG-TENOF 300<br>MG TABLET                                         | 2.362                                       |               | 1.863         | 2.328             | 2.000              |
| problem_list:709.1                     | Vascular disorders of skin                                                                                          | 2.353                                       |               | 3.054         | 2.125             | 1.816              |
| problem_list:271.0                     | Glycogenosis                                                                                                        | 2.344                                       |               |               |                   | 2.104              |
| problem_list:332.1                     | Secondary parkinsonism                                                                                              | 2.340                                       |               | 1.905         | 2.181             | 1.866              |
| meds_administered:300022               | URSODIOL 60 MG/ML ORAL SUSP                                                                                         | 2.331                                       |               |               |                   | 1.425              |
| meds_administered:7019                 | FLUOCINONIDE 0.05 % TOPICAL<br>OINTMENT                                                                             | 2.257                                       |               |               |                   | 1.653              |
| problem_list:V10.01                    | Personal history of malignant neoplasm<br>of tongue                                                                 | 2.217                                       |               | 1.673         | 1.830             | 1.733              |
| problem_list:564.4                     | Other postoperative functional disorders                                                                            | 2.195                                       |               | 2.084         | 1.581             | 1.412              |
| meds_administered:400719               | HEPARIN FOR DIALYSIS 250<br>UNITS/ML IN NS SYRINGE                                                                  | 2.178                                       |               | 1.400         | 1.745             | 1.539              |
| meds_reported:59140                    | QUETIAPINE ORAL                                                                                                     | 2.154                                       |               | 1.442         | 1.718             | 1.509              |
| problem_list:296.53                    | Bipolar I disorder, most recent episode<br>(or current) depressed, severe, without<br>mention of psychotic behavior | 2.141                                       |               | 1.468         | 1.980             | 1.711              |
| meds_reported:48762                    | EXCEDRIN MIGRAINE ORAL                                                                                              | 2.110                                       |               | 1.156         | 1.591             | 1.410              |
| meds_administered:4298                 | FLUOCINOLONE 0.01 % TOPICAL<br>CREAM                                                                                | 2.109                                       |               | 1.540         | 1.949             | 1.541              |
| meds_reported:15792                    | PRAMOXINE-CALAMINE 1 %-8 %<br>LOTION                                                                                | 2.108                                       |               | 1.795         | 1.654             | 1.941              |
| meds_reported:28094                    | CLONAZEPAM 0.25 MG<br>DISINTEGRATING TABLET                                                                         | 2.103                                       |               | 1.713         | 1.967             | 1.703              |
| meds_reported:56785                    | OYSTER CALCIUM ORAL                                                                                                 | 2.080                                       | 1.792         |               | 1.890             | 1.694              |
| meds_reported:4939                     | TACROLIMUS 5 MG CAP                                                                                                 | 2.073                                       |               |               |                   | 1.260              |
| surgery_cases:BURR HOLES/EVAC HEMATOMA |                                                                                                                     | 2.062                                       |               | 2.607         | 2.685             | 2.426              |
| meds_administered:31853                | MYCOPHENOLATE SODIUM 360 MG<br>TABLET,DELAYED RELEASE                                                               | 2.054                                       |               | 0.532         | 0.957             | 0.822              |

| Variable                                  | Description                                                                                                      | Model coefficients for each case definition |            |            |                |                 |
|-------------------------------------------|------------------------------------------------------------------------------------------------------------------|---------------------------------------------|------------|------------|----------------|-----------------|
|                                           |                                                                                                                  | by ICD-9 code                               | by EIA (+) | by PCR (+) | EIA or PCR (+) | by any of these |
| meds_administered:400359                  | PIPERACILLIN-TAZOBACTAM 3.375 G IVPB                                                                             | 1.999                                       |            | 1.641      | 1.683          | 1.485           |
| meds_administered:400951                  | HYDROCORTISONE IN D5W 500 ML INFUSION                                                                            | 1.997                                       |            | 0.397      | 0.995          | 1.952           |
| meds_reported:81611                       | CERTOLIZUMAB PEGOL 400 MG (200 MG X 2) SUB-Q KIT                                                                 | 1.996                                       |            | 1.434      | 1.946          | 1.858           |
| meds_reported:29143                       | AMPICILLIN-SULBACTAM 3 GRAM IV PIGGY BACK                                                                        | 1.931                                       |            |            |                | 1.675           |
| abnormal_labs:20857-BAND CELL             |                                                                                                                  | 1.909                                       |            | 1.488      | 1.193          | 0.996           |
| problem_list:173.11                       | Basal cell carcinoma of eyelid, including canthus                                                                | 1.901                                       |            | 1.308      | 1.675          | 1.444           |
| problem_list:476.0                        | Chronic laryngitis                                                                                               | 1.897                                       |            | 1.448      | 1.844          | 1.617           |
| problem_list:553.00                       | Femoral hernia without mention of obstruction of gangrene, unilateral or unspecified(not specified as recurrent) | 1.889                                       |            | 1.161      | 1.291          | 1.052           |
| meds_reported:48022                       | EC ASPIRIN ORAL                                                                                                  | 1.885                                       |            | 1.576      | 1.963          | 1.733           |
| meds_administered:1093                    | MESALAMINE ER 250 MG CAPSULE,EXTENDED RELEASE                                                                    | 1.866                                       |            | 1.372      | 1.625          | 1.492           |
| problem_list:708.8                        | Other specified urticaria                                                                                        | 1.840                                       |            |            |                | 1.402           |
| problem_list:643.03                       | Mild hyperemesis gravidarum, antepartum condition or complication                                                | 1.835                                       |            | 1.158      | 1.734          | 1.427           |
| problem_list:707.24                       | Pressure ulcer, stage IV                                                                                         | 1.827                                       |            |            |                | 0.696           |
| meds_reported:28400                       | PEG 400-PROPYLENE GLYCOL 0.4 % -0.3 % EYE DROPS                                                                  | 1.810                                       |            | 1.163      | 1.810          | 1.589           |
| problem_list:389.20                       | Mixed hearing loss, unspecified                                                                                  | 1.807                                       |            | 1.149      | 1.622          | 1.467           |
| meds_reported:86402                       | CERTOLIZUMAB PEGOL 400 MG/2 ML (200 MG/ML X 2) SUBQ SYRINGE KIT                                                  | 1.805                                       |            | 1.916      | 1.765          | 1.446           |
| meds_reported:28557                       | POVIDONE-IODINE 10 % TOPICAL SOLN                                                                                | 1.799                                       |            | 1.280      | 1.324          | 1.198           |
| problem_list:478.29                       | Other diseases of pharynx, not elsewhere classified                                                              | 1.792                                       | 2.704      |            | 1.529          | 1.256           |
| surgery_cases:COLONOSCOPY\BIOPSY\BRUSHING |                                                                                                                  | 1.788                                       | 2.516      |            | 1.382          | 1.072           |
| problem_list:204.00                       | Acute lymphoid leukemia, without mention of having achieved remission                                            | 1.784                                       |            |            | 0.047          | 0.919           |
| problem_list:009.1                        | Colitis, enteritis, and gastroenteritis of presumed infectious origin                                            | 1.767                                       | 6.191      |            | 1.396          | 1.163           |
| meds_reported:48357                       | ENSURE ORAL                                                                                                      | 1.764                                       |            | 1.007      | 1.281          | 1.400           |
| problem_list:836.1                        | Tear of lateral cartilage or meniscus of knee, current                                                           | 1.763                                       |            | 2.041      | 1.539          | 1.303           |
| problem_list:996.44                       | Peri-prosthetic fracture around prosthetic joint                                                                 | 1.762                                       |            | 1.053      | 1.583          | 1.336           |
| problem_list:347.00                       | Narcolepsy, without cataplexy                                                                                    | 1.759                                       |            | 1.879      | 1.714          | 1.349           |
| meds_reported:8373                        | HYDROMORPHONE (PF) 1 MG/ML INJECTION                                                                             | 1.757                                       |            | 1.011      | 1.124          | 1.085           |
| meds_administered:8320                    | ONDANSETRON 8 MG DISINTEGRATING TABLET                                                                           | 1.744                                       |            | 0.654      | 0.988          | 1.270           |
| meds_reported:28595                       | IMATINIB 100 MG TABLET                                                                                           | 1.727                                       |            | 1.246      | 0.993          | 0.716           |
| meds_reported:39537                       | DIAZEPAM 5 MG-7.5 MG-10 MG RECTAL KIT                                                                            | 1.726                                       |            | 2.160      | 2.067          | 1.530           |
| meds_reported:18563                       | LACTOBACILLUS RHAMNOSUS GG 10 BILLION CELL CAPSULE                                                               | 1.692                                       |            |            |                | 0.924           |
| meds_reported:6484                        | LITHIUM CARBONATE ER 300 MG TAB                                                                                  | 1.683                                       |            | 0.962      | 1.409          | 1.182           |
| problem_list:341.0                        | Neuromyelitis optica                                                                                             | 1.650                                       |            |            |                | 0.914           |
| meds_administered:400100                  | AZTREONAM IVPB                                                                                                   | 1.647                                       |            | 0.586      | 0.861          | 0.702           |
| meds_administered:20356                   | METHADONE 5 MG/5 ML ORAL SOLN                                                                                    | -1.629                                      |            |            |                | -0.412          |
| problem_list:757.33                       | Congenital pigmentary anomalies of skin                                                                          | 1.586                                       |            | 0.320      | 0.856          | 0.770           |
| meds_reported:42227                       | ASACOL ORAL                                                                                                      | 1.573                                       |            | 0.321      | 0.533          | 1.355           |
| problem_list:334.3                        | Other cerebellar ataxia                                                                                          | 1.568                                       |            |            |                | 0.879           |
| problem_list:799.9                        | Other unknown and unspecified cause of morbidity and mortality                                                   | 1.548                                       | 4.299      |            | 1.223          | 0.857           |
| meds_reported:50757                       | HEPARIN (PORCINE) MISC                                                                                           | 1.534                                       |            | 0.802      | 1.125          | 0.871           |
| meds_reported:8878                        | BETHANECHOL CHLORIDE 25 MG TABLET                                                                                | 1.496                                       |            | 1.865      | 1.839          | 1.803           |



| Variable                             | Description                                                            | Model coefficients for each case definition |            |            |                |                 |
|--------------------------------------|------------------------------------------------------------------------|---------------------------------------------|------------|------------|----------------|-----------------|
|                                      |                                                                        | by ICD-9 code                               | by EIA (+) | by PCR (+) | EIA or PCR (+) | by any of these |
| meds_reported:52824                  | LEVAQUIN ORAL                                                          | 1.488                                       |            | 0.759      | 1.042          | 0.827           |
| problem_list:362.74                  | Pigmentary retinal dystrophy                                           | 1.480                                       |            |            |                | 1.054           |
| meds_administered:15959              | NORGESTIMATE-ETHINYL<br>ESTRADIOL 0.18/0.215/0.25 MG-35<br>MCG(28) TAB | 1.471                                       |            | 1.028      | 1.626          | 1.212           |
| meds_reported:4526                   | PYRIDOXINE 25 MG TABLET                                                | 1.468                                       |            | 0.878      | 1.258          | 1.140           |
| meds_reported:2857                   | FUROSEMIDE 10 MG/ML ORAL SOLN                                          | 1.444                                       |            | 0.644      | 0.928          | 0.624           |
| meds_administered:5971               | PANTOPRAZOLE 40 MG<br>INTRAVENOUS SOLUTION                             | 1.435                                       |            |            |                | 0.987           |
| meds_reported:39642                  | CALCIUM CARBONATE-VITAMIN D3<br>250 MG-125 UNIT TABLET                 | 1.431                                       |            | 1.025      | 1.163          | 1.002           |
| meds_administered:3134               | CLONIDINE 0.2 MG/24 HR WEEKLY<br>TRANSDERMAL PATCH                     | 1.395                                       |            | 0.769      | 1.148          | 0.873           |
| meds_reported:87971                  | THYROID (PORK) 60 MG TAB                                               | 1.375                                       |            | 0.758      | 1.379          | 1.046           |
| problem_list:239.9                   | Neoplasm of unspecified nature, site<br>unspecified                    | 1.353                                       | 1.617      |            | 0.894          | 0.717           |
| problem_list:161.0                   | Malignant neoplasm of glottis                                          | 1.346                                       | 3.831      |            | 1.096          | 0.821           |
| meds_reported:59360                  | REGLAN ORAL                                                            | 1.345                                       |            | 0.757      | 0.886          | 0.663           |
| meds_reported:80345                  | TAP WATER ENEMA                                                        | -1.324                                      |            | -0.527     | -1.433         | -1.109          |
| problem_list:478.20                  | Unspecified disease of pharynx                                         | 1.324                                       |            | 0.577      | 0.995          | 0.748           |
| meds_administered:400057             | MEROPENEM IVPB                                                         | 1.315                                       |            | 1.203      | 1.122          | 1.229           |
| meds_reported:3840                   | POTASSIUM CHLORIDE POWDER                                              | 1.298                                       |            |            |                | 1.479           |
| problem_list:579.8                   | Other specified intestinal malabsorption                               | 1.294                                       |            |            |                | 0.980           |
| problem_list:556.2                   | Ulcerative (chronic) proctitis                                         | 1.280                                       |            |            | 0.058          | 0.971           |
| surgery_cases:COLON RESECTION        |                                                                        | 1.278                                       | 1.160      | 0.144      | 1.074          | 0.857           |
| abnormal_labs:295-SICKLE CELL SCREEN |                                                                        | 1.271                                       |            |            |                | 0.653           |
| surgery_cases:FLEXIBLE SIGMOIDOSCOPY |                                                                        | 1.256                                       |            |            |                | 1.128           |
| meds_administered:11019              | LINEZOLID 600 MG TABLET                                                | 1.234                                       |            |            |                | 0.667           |
| meds_reported:29146                  | CEFAZOLIN 1 GRAM IV PIGGY BACK                                         | 1.230                                       |            | 2.036      | 2.158          | 1.826           |
| meds_reported:29494                  | CHOLESTYRAMINE (WITH SUGAR) 4<br>GRAM PACKET                           | 1.230                                       |            | 1.057      | 1.150          | 1.390           |
| meds_reported:300099                 | LIDOCAINE-PRILOCAINE 2.5 %-2.5 %<br>TOPICAL CREAM                      | -1.206                                      |            | -0.563     | -1.276         | -1.029          |
| meds_reported:14636                  | ACETYLCYSTEINE 100 MG/ML (10 %)<br>SOLUTION                            | 1.204                                       |            | 0.573      | 0.505          | 0.463           |
| meds_reported:18658                  | COLESTIPOL 5 GRAM ORAL PACKET                                          | 1.203                                       |            |            |                | 1.050           |
| problem_list:453.4                   |                                                                        | 1.199                                       | 2.768      |            | 2.053          | 1.802           |
| meds_reported:17030                  | FAMOTIDINE 40 MG/5 ML ORAL<br>SUSPENSION                               | 1.189                                       |            | 0.887      | 1.396          | 0.963           |
| problem_list:560.0                   | Intussusception                                                        | 1.181                                       |            | 0.744      | 0.931          | 0.635           |
| meds_administered:400312             | FLUDARABINE INFUSION                                                   | 1.165                                       |            |            | 0.024          |                 |
| meds_reported:4704                   | HYDROMORPHONE 8 MG TABLET                                              | 1.156                                       |            | 0.391      | 0.530          | 0.732           |
| meds_administered:13223              | DIPHENHYDRAMINE 12.5 MG/5 ML<br>ELIXIR                                 | 1.155                                       |            |            |                | 0.223           |
| meds_reported:9111                   | LOPERAMIDE 1 MG/5 ML ORAL<br>LIQUID                                    | 1.147                                       |            | 0.712      | 0.990          | 0.736           |
| meds_administered:12933              | DEXAMETHASONE 0.1 % EYE<br>DROPS,SUSPENSION                            | 1.136                                       |            |            |                | 0.490           |
| meds_administered:85032              | LEVETIRACETAM 500 MG/5 ML (5 ML)<br>ORAL SOLN                          | 1.131                                       |            | 0.076      | 0.001          | 0.577           |
| problem_list:V78.1                   | Screening for other and unspecified<br>deficiency anemia               | 1.130                                       | 1.181      |            | 0.811          | 0.664           |
| meds_reported:6032                   | CLINDAMYCIN 150 MG CAP                                                 | 1.128                                       |            | 0.211      | 0.492          | 0.302           |
| problem_list:711.00                  | Pyogenic arthritis, site unspecified                                   | 1.124                                       |            |            | 0.730          | 0.621           |
| problem_list:994.9                   | Other effects of external causes                                       | 1.121                                       |            | 1.568      | 0.831          | 0.688           |
| meds_reported:58577                  | PRO-STAT AWC ORAL                                                      | 1.090                                       |            | 0.667      | 0.944          | 0.923           |
| meds_reported:28093                  | CLONAZEPAM 0.125 MG<br>DISINTEGRATING TABLET                           | 1.090                                       |            | 0.825      | 1.041          | 0.781           |
| problem_list:362.36                  | Venous tributary (branch) occlusion                                    | 1.090                                       | -1.369     | 0.856      | 0.953          | 0.881           |
| meds_reported:17056                  | COLLAGENASE CLOSTRIDIUM<br>HISTOLYTICUM 250 UNIT/G<br>OINTMENT         | 1.088                                       |            | 0.176      | 0.093          | 0.058           |
| meds_reported:5327                   | VITAMIN A & D TOPICAL OINTMENT                                         | 1.088                                       |            | 1.203      | 1.127          | 0.703           |
| meds_reported:51053                  | HYDRALAZINE INJ                                                        | 1.086                                       |            | 0.777      | 0.606          | 0.472           |

| Variable                                             | Description                                                          | Model coefficients for each case definition |            |            |                |                 |
|------------------------------------------------------|----------------------------------------------------------------------|---------------------------------------------|------------|------------|----------------|-----------------|
|                                                      |                                                                      | by ICD-9 code                               | by EIA (+) | by PCR (+) | EIA or PCR (+) | by any of these |
| problem_list:555.2                                   | Regional enteritis of small intestine with large intestine           | 1.074                                       | 0.122      | 0.303      | 0.523          | 0.692           |
| meds_administered:12449                              | RANITIDINE IN 0.45 % SODIUM CHLORIDE 50 MG/50 ML IV PIGGY BACK       | 1.073                                       |            |            | 0.785          | 0.545           |
| meds_administered:36912                              | MESALAMINE ER 500 MG CAP                                             | 1.071                                       |            | 0.828      | 0.923          | 0.899           |
| meds_reported:2736                                   | PHYTONADIONE 10 MG/ML INJECTION SOLUTION                             | -1.067                                      |            | -0.368     | -0.807         | -0.638          |
| problem_list:288.65                                  | Basophilia                                                           | -1.066                                      |            |            |                | -0.103          |
| problem_list:292.89                                  | Other specified drug-induced mental disorders                        | 1.043                                       |            |            |                | 0.630           |
| meds_administered:2708                               | LOPERAMIDE 2 MG CAP                                                  | 1.040                                       |            | 0.831      | 0.939          | 0.723           |
| meds_administered:105813                             | MESALAMINE 400 MG CAPSULE,DELAYED RELEASE                            | 1.038                                       |            | 0.526      | 0.665          | 0.791           |
| meds_reported:28730                                  | BISMUTH TRIBROM-PETROLATUM,WH 5" X 9" BANDAGE                        | -1.004                                      |            |            | -0.613         | -0.438          |
| meds_reported:10880                                  | HYOSCYAMINE ER 0.375 MG TABLET,EXTENDED RELEASE,12 HR                | 1.001                                       |            | 0.990      | 1.220          | 0.761           |
| meds_reported:19847                                  | VANCOMYCIN 500 MG/100 ML IN DEXTROSE 5 % INTRAVENOUS PIGGYBACK       | -0.995                                      |            |            |                | -0.903          |
| problem_list:558.9                                   | Other and unspecified noninfectious gastroenteritis and colitis      | 0.989                                       |            | 0.419      | 0.429          | 0.768           |
| meds_administered:400092                             | AMPHOTERICIN B LIPOSOME IVPB                                         | 0.984                                       |            | 1.298      | 1.426          | 1.153           |
| meds_administered:400642                             | DEXTROSE 10%, W/WO SALINE/ADDITIVES                                  | 0.973                                       |            | 0.354      | 0.777          | 0.360           |
| surgery_cases:VENOUS ACCESS INS/ADULT/GS             |                                                                      | 0.944                                       |            | 1.231      | 1.499          | 1.388           |
| problem_list:621.5                                   | Intrauterine synechiae                                               | 0.943                                       |            | 0.599      | 0.833          | 0.649           |
| meds_reported:410145                                 | PANTOPRAZOLE 40 MG IN NS 100 ML (MSQ)                                | -0.927                                      |            | -0.343     | -0.725         | -0.615          |
| meds_reported:4039                                   | CEFAZOLIN 1 GRAM INTRAVENOUS SOLUTION                                | -0.925                                      |            | -0.479     | -1.051         | -0.815          |
| meds_reported:28227                                  | ACYCLOVIR 5 % TOPICAL CREAM                                          | 0.922                                       |            | 0.608      | 0.787          | 0.685           |
| problem_list:513.0                                   | Abscess of lung                                                      | 0.921                                       | 2.636      |            | 1.543          | 1.364           |
| meds_administered:9975                               | PROPRANOLOL 40 MG TABLET                                             | 0.920                                       |            | 0.338      | 0.655          | 0.499           |
| problem_list:883.0                                   | Open wound of finger(s), without mention of complication             | 0.911                                       |            |            |                | 0.517           |
| problem_list:205.00                                  | Acute myeloid leukemia, without mention of having achieved remission | 0.909                                       | 0.857      | 1.130      | 1.089          | 0.962           |
| surgery_cases:FLEXIBLE SIGMOIDOSCOPY/BIOPSY/BRUSHING |                                                                      | 0.906                                       |            | 2.389      | 1.337          | 0.785           |
| problem_list:537.0                                   | Acquired hypertrophic pyloric stenosis                               | 0.904                                       |            |            |                | 0.284           |
| surgery_cases:ILEOSTOMY/LAPAROSCOPY                  |                                                                      | 0.891                                       | 2.130      |            | 0.737          | 0.481           |
| meds_administered:400029                             | CEFTAZIDIME 1 G IVPB                                                 | 0.885                                       |            |            |                | 0.954           |
| problem_list:197.6                                   | Secondary malignant neoplasm of retroperitoneum and peritoneum       | 0.883                                       |            | 1.357      | 1.130          | 1.043           |
| problem_list:783.7                                   | Adult failure to thrive                                              | 0.872                                       |            | 0.608      | 0.678          | 0.512           |
| problem_list:555.1                                   | Regional enteritis of large intestine                                | 0.866                                       |            | 0.881      | 0.813          | 0.778           |
| meds_administered:19994                              | RANITIDINE 15 MG/ML SYRUP                                            | 0.850                                       |            | 0.290      | 0.258          | 0.150           |
| meds_reported:88450                                  | ACETAMINOPHEN 650 MG/20.3 ML ORAL SOLN                               | 0.847                                       |            | 0.892      | 1.106          | 1.021           |
| abnormal_labs:2040-OCCULT BLOOD, STOOL               |                                                                      | 0.846                                       |            | 0.346      | 0.465          | 0.263           |
| problem_list:367.0                                   | Hypermetropia                                                        | 0.842                                       |            |            |                | 0.384           |
| meds_reported:45378                                  | CLARITIN ORAL                                                        | 0.840                                       |            | 0.120      | 0.643          | 0.455           |
| meds_reported:747                                    | MESALAMINE 4 GRAM/60 ML ENEMA                                        | 0.836                                       |            | 1.405      | 1.347          | 0.953           |
| meds_administered:8022                               | BECLOMETHASONE DIPROPIONATE 80 MCG/ACTUATION AEROSOL INHALER         | 0.830                                       |            |            |                | 0.010           |
| problem_list:787.22                                  | Dysphagia, oropharyngeal phase                                       | 0.823                                       |            | 0.233      | 0.446          | 0.379           |
| problem_list:212.6                                   | Benign neoplasm of thymus                                            | 0.818                                       |            |            |                | 0.322           |
| problem_list:442.81                                  | Aneurysm of artery of neck                                           | 0.817                                       |            |            |                | 0.547           |
| meds_reported:9812                                   | FLAXSEED OIL 1,000 MG CAPSULE                                        | 0.817                                       |            | 0.384      | 0.620          | 0.476           |
| problem_list:216.8                                   | Benign neoplasm of other specified sites of skin                     | -0.810                                      |            |            |                | -0.144          |
| meds_administered:12205                              | METHYLPREDNISOLONE SODIUM                                            | 0.803                                       |            | 0.723      | 1.053          | 0.704           |

| Variable                                | Description                                                      | Model coefficients for each case definition |            |            |                |                 |
|-----------------------------------------|------------------------------------------------------------------|---------------------------------------------|------------|------------|----------------|-----------------|
|                                         |                                                                  | by ICD-9 code                               | by EIA (+) | by PCR (+) | EIA or PCR (+) | by any of these |
|                                         | SUCC 1,000 MG INTRAVENOUS SOLUTION                               |                                             |            |            |                |                 |
| meds_reported:34645                     | TRYPsin-BALSAM-CASTOR OIL 0.12 MG-87 MG/GRAM TOPICAL SPRAY       | -0.801                                      |            | -2.479     | -4.149         | -3.007          |
| meds_reported:31131                     | SACCHAROMYCES BOULARDII 250 MG CAPSULE                           | 0.786                                       | 0.773      | 0.455      | 0.824          | 0.883           |
| surgery_cases:ESOPHAGECTOMY             |                                                                  | 0.780                                       |            | 1.873      | 1.958          | 1.799           |
| meds_reported:101394                    | ENSURE CLEAR ORAL                                                | 0.776                                       |            |            |                | 0.828           |
| meds_reported:9542                      | MESALAMINE 400 MG TAB, DELAYED RELEASE                           | 0.773                                       |            | 1.003      | 1.001          | 0.824           |
| meds_administered:3298                  | MICONAZOLE NITRATE 2 % TOPICAL CREAM                             | 0.764                                       |            |            |                | 0.258           |
| meds_administered:6448                  | ALUMINUM ACETATE TOPICAL SOLN                                    | 0.755                                       |            |            |                | 0.379           |
| meds_administered:20636                 | MODAFINIL 100 MG TAB                                             | 0.752                                       | -0.098     | 0.278      | 0.077          | 0.930           |
| meds_reported:76221                     | HYDROMORPHONE (PF) 2 MG/ML INJECTION SOLUTION                    | 0.745                                       |            |            |                | 0.357           |
| meds_reported:60511                     | SINEMET ORAL                                                     | 0.742                                       |            | 0.387      | 0.595          | 0.421           |
| meds_administered:18563                 | LACTOBACILLUS RHAMNOSUS GG 10 BILLION CELL CAPSULE               | 0.731                                       |            | 0.888      | 0.953          | 0.748           |
| problem_list:V49.86                     | Do not resuscitate status                                        | 0.729                                       | 1.469      |            | 0.705          | 0.538           |
| problem_list:V13.59                     | Personal history of other musculoskeletal disorders              | 0.727                                       |            | 0.358      | 0.500          | 0.330           |
| meds_reported:4952                      | RIZATRIPTAN 10 MG TAB                                            | 0.725                                       |            | 0.196      | 0.514          | 0.316           |
| meds_administered:400740                | FOSAPREPITANT 150/DEX 12/ZOFRAN 8 COMBO                          | 0.725                                       |            | 0.096      | 0.177          | 0.352           |
| problem_list:070.1                      | Viral hepatitis A without mention of hepatic coma                | 0.719                                       |            | 0.695      | 0.329          | 0.238           |
| abnormal_labs:2616-ATYPICAL LYMPHOCYTES |                                                                  | 0.712                                       |            | 0.016      | 0.003          |                 |
| meds_reported:3545                      | BENZONATATE 200 MG CAPSULE                                       | 0.709                                       |            | 0.242      | 0.532          | 0.287           |
| meds_reported:72782                     | DARBEPOETIN ALFA 200 MCG/0.4 ML IN POLYSORBATE INJECTION SYRINGE | -0.707                                      |            |            |                | -0.695          |
| problem_list:318.2                      | Profound intellectual disabilities                               | 0.699                                       | 0.250      |            | 0.370          | 0.192           |
| problem_list:211.1                      | Benign neoplasm of stomach                                       | 0.696                                       | 1.290      |            | 0.564          | 0.328           |
| problem_list:357.9                      | Unspecified inflammatory and toxic neuropathy                    | 0.682                                       |            |            |                | 0.354           |
| problem_list:379.99                     | Other ill-defined disorders of eye                               | 0.676                                       | 1.568      |            | 0.525          | 0.287           |
| problem_list:995.7                      | Other adverse food reactions, not elsewhere classified           | 0.676                                       |            |            |                | 0.307           |
| problem_list:363.62                     | Expulsive choroidal hemorrhage                                   | -0.675                                      |            |            | -0.536         | -0.701          |
| meds_administered:88448                 | ACETAMINOPHEN 160 MG/5 ML (5 ML) ORAL SOLUTION                   | 0.674                                       |            |            |                |                 |
| meds_administered:34674                 | CINACALCET 30 MG TAB                                             | 0.674                                       |            | 0.282      | 0.298          | 0.347           |
| problem_list:556.9                      | Ulcerative colitis, unspecified                                  | 0.664                                       |            | 0.257      | 0.234          | 0.489           |
| meds_administered:91038                 | FERROUS GLUCONATE 324 MG (37.5 MG IRON) TABLET                   | 0.655                                       |            | 0.593      | 0.843          | 0.990           |
| meds_reported:783                       | CLOTRIMAZOLE 10 MG TROCHE                                        | 0.651                                       | 5.554      |            |                |                 |
| meds_administered:1199                  | DIPYRIDAMOLE-ASPIRIN ER 200 MG-25 MG MULTIPHASE 12 HR CAP        | 0.648                                       |            | 0.175      | 0.219          | 0.002           |
| surgery_cases:CYSTECTOMY+ILEALCONDUIT   |                                                                  | 0.645                                       |            | 1.135      | 0.940          | 0.795           |
| meds_reported:87514                     | SEVELAMER CARBONATE 0.8 GRAM ORAL POWDER PACKET                  | 0.643                                       |            |            | 0.287          | 0.085           |
| meds_reported:34674                     | CINACALCET 30 MG TAB                                             | 0.642                                       |            | 0.284      | 0.252          | 0.373           |
| problem_list:212.7                      | Benign neoplasm of heart                                         | 0.633                                       |            |            |                | 0.122           |
| problem_list:238.79                     | Other lymphatic and hematopoietic tissues                        | 0.627                                       |            |            |                |                 |
| meds_administered:4831                  | CEFTRIAXONE 250 MG SOLUTION FOR INJECTION                        | 0.625                                       |            | 0.056      | 0.485          | 0.246           |
| meds_administered:25759                 | HYDROMORPHONE 4 MG/ML INJECTION SYRINGE                          | 0.622                                       |            | 0.342      | 0.572          | 0.397           |
| problem_list:696.0                      | Psoriatic arthropathy                                            | 0.618                                       |            |            |                | 0.268           |
| problem_list:272.5                      | Lipoprotein deficiencies                                         | 0.618                                       |            | 0.541      | 0.517          | 0.315           |
| problem_list:357.6                      | Polyneuropathy due to drugs                                      | 0.616                                       |            |            |                | 0.366           |
| problem_list:599.7                      |                                                                  | 0.610                                       | 1.222      |            | 0.461          | 0.205           |

| Variable                                   | Description                                                                                                             | Model coefficients for each case definition |               |               |                   |                    |
|--------------------------------------------|-------------------------------------------------------------------------------------------------------------------------|---------------------------------------------|---------------|---------------|-------------------|--------------------|
|                                            |                                                                                                                         | by ICD-9<br>code                            | by EIA<br>(+) | by PCR<br>(+) | EIA or<br>PCR (+) | by any<br>of these |
| meds_reported:76695                        | PRENATAL VIT WITHOUT CALCIUM-<br>IRON GLUC-FOLIC ACID 30 MG-800<br>MCG TAB                                              | 0.608                                       | 7.580         |               | 0.536             | 0.300              |
| meds_reported:47365                        | DILANTIN ORAL                                                                                                           | 0.607                                       |               | 0.144         | 0.327             | 0.169              |
| meds_reported:58848                        | PROTONIX ORAL                                                                                                           | 0.599                                       |               |               |                   | 0.665              |
| meds_reported:13171                        | INFLIXIMAB 100 MG IV SOLUTION                                                                                           | 0.598                                       |               | 0.933         | 0.976             | 0.762              |
| meds_reported:18265                        | CARBIDOPA 25 MG-LEVODOPA 100<br>MG TABLET                                                                               | 0.597                                       |               | 0.250         | 0.240             | 0.202              |
| meds_reported:17268                        | BUDESONIDE DR & ER 3 MG<br>CAP,DELAYED & EXTENDED<br>RELEASE                                                            | 0.590                                       |               | 0.151         | 0.186             | 0.421              |
| problem_list:379.24                        | Other vitreous opacities                                                                                                | 0.578                                       |               |               |                   | 0.180              |
| problem_list:530.9                         | Unspecified disorder of esophagus                                                                                       | 0.571                                       |               |               |                   |                    |
| problem_list:719.06                        | Effusion of joint, lower leg                                                                                            | 0.563                                       | 1.161         |               | 0.363             | 0.172              |
| meds_administered:400556                   | FAMOTIDINE IVPB                                                                                                         | 0.562                                       |               | 0.271         | 0.388             | 0.228              |
| problem_list:690.18                        | Other seborrheic dermatitis                                                                                             | 0.559                                       | 1.835         |               | 0.425             | 0.204              |
| problem_list:556.5                         | Left-sided ulcerative (chronic) colitis                                                                                 | 0.552                                       |               |               |                   | 0.073              |
| problem_list:535.60                        | Duodenitis, without mention of<br>hemorrhage                                                                            | 0.551                                       |               |               |                   | 0.233              |
| meds_reported:6918                         | AZATHIOPRINE 50 MG TABLET                                                                                               | 0.550                                       |               | 0.571         | 0.687             | 0.356              |
| meds_reported:4733                         | METHYLPHENIDATE 5 MG TABLET                                                                                             | 0.550                                       |               |               |                   | 0.349              |
| meds_reported:10134                        | MINERAL OIL ENEMA                                                                                                       | 0.548                                       |               | 0.079         | 0.263             | 0.092              |
| problem_list:E980.5                        | Poisoning by unspecified drug or<br>medicinal substance, undetermined<br>whether accidentally or purposely<br>inflicted | 0.545                                       |               | 0.199         | 0.279             | 0.571              |
| problem_list:277.30                        | Amyloidosis, unspecified                                                                                                | 0.540                                       |               | 0.261         | 0.417             | 0.254              |
| meds_reported:1084                         | VALGANCICLOVIR 450 MG TABLET                                                                                            | 0.539                                       |               |               |                   |                    |
| meds_reported:42453                        | ATIVAN ORAL                                                                                                             | 0.538                                       |               |               |                   | 0.200              |
| problem_list:785.50                        | Shock, unspecified                                                                                                      | 0.537                                       |               | 1.334         | 1.142             | 1.246              |
| meds_administered:2738                     | LAMIVUDINE 100 MG TABLET                                                                                                | 0.533                                       |               | 0.113         | 0.479             | 0.166              |
| problem_list:572.0                         | Abscess of liver                                                                                                        | 0.527                                       |               |               |                   | 0.013              |
| meds_administered:10380                    | ONDANSETRON HCL 4 MG/5 ML<br>ORAL SOLN                                                                                  | 0.526                                       |               | 0.235         | 0.426             | 0.268              |
| meds_reported:13705                        | HYDROCORTISONE 100 MG/60 ML<br>ENEMA                                                                                    | 0.520                                       |               | 1.744         | 1.905             | 1.528              |
| meds_reported:3298                         | MICONAZOLE NITRATE 2 % TOPICAL<br>CREAM                                                                                 | 0.520                                       |               | 0.043         |                   |                    |
| surgery_cases:VENOUS ACCESS INS/ADULT/VASC |                                                                                                                         | 0.519                                       | 1.843         |               | 1.138             | 1.145              |
| meds_administered:4033                     | FLUCONAZOLE 400 MG/200 ML IN<br>SODIUM CHLORIDE (ISO-OSM) IV<br>PIGGY BACK                                              | 0.516                                       |               | 0.209         | 0.243             | 0.237              |
| problem_list:339.00                        | Cluster headache syndrome,<br>unspecified                                                                               | 0.515                                       | 3.481         |               | 0.411             | 0.187              |
| problem_list:238.76                        | Myelofibrosis with myeloid metaplasia                                                                                   | 0.515                                       |               |               |                   |                    |
| meds_administered:14588                    | MINOXIDIL 10 MG TABLET                                                                                                  | 0.514                                       |               | 0.181         | 0.361             | 0.158              |
| meds_administered:2119                     | PREDNISOLONE SODIUM<br>PHOSPHATE 15 MG/5 ML ORAL<br>SOLUTION                                                            | 0.502                                       |               |               |                   |                    |
| problem_list:277.39                        | Other amyloidosis                                                                                                       | 0.501                                       |               | 0.233         | 0.385             | 0.247              |
| problem_list:999.31                        | Other and unspecified infection due to<br>central venous catheter                                                       | 0.497                                       |               |               |                   | 0.102              |
| meds_administered:72783                    | DARBEPOETIN ALFA 40 MCG/0.4 ML<br>IN POLYSORBATE INJECTION<br>SYRINGE                                                   | 0.495                                       |               |               |                   |                    |
| problem_list:V77.0                         | Screening for thyroid disorders                                                                                         | 0.495                                       | 1.188         |               | 0.238             | 0.133              |
| meds_administered:709                      | FLUCONAZOLE 100 MG TABLET                                                                                               | 0.495                                       |               |               |                   |                    |
| meds_administered:17041                    | NYSTATIN 100,000 UNIT/GRAM<br>TOPICAL POWDER                                                                            | 0.486                                       |               | 0.502         | 0.511             | 0.575              |
| meds_administered:7237                     | LEVOFLOXACIN 250 MG TABLET                                                                                              | 0.481                                       |               | 0.105         | 0.141             | 0.013              |
| meds_reported:4912                         | SPIRONOLACTONE 100 MG TABLET                                                                                            | 0.467                                       |               |               |                   |                    |
| meds_administered:9542                     | MESALAMINE 400 MG TAB, DELAYED<br>RELEASE                                                                               | 0.465                                       |               | 0.426         | 0.389             | 0.343              |
| meds_administered:14235                    | NS WITH POTASSIUM CHLORIDE 20                                                                                           | 0.461                                       |               | 0.272         | 0.242             | 0.218              |

| Variable                                | Description                                                                                                 | Model coefficients for each case definition |            |            |                |                 |
|-----------------------------------------|-------------------------------------------------------------------------------------------------------------|---------------------------------------------|------------|------------|----------------|-----------------|
|                                         |                                                                                                             | by ICD-9 code                               | by EIA (+) | by PCR (+) | EIA or PCR (+) | by any of these |
|                                         | MEQ/L IV                                                                                                    |                                             |            |            |                |                 |
| meds_administered:17056                 | COLLAGENASE CLOSTRIDIUM HISTOLYTICUM 250 UNIT/G OINTMENT                                                    | 0.458                                       | 2.321      | 0.616      | 0.899          | 0.754           |
| meds_reported:1464                      | PREDNISON 10 MG TABLET                                                                                      | 0.453                                       |            | 0.144      | 0.113          | 0.471           |
| meds_reported:26068                     | VALSARTAN 40 MG TABLET                                                                                      | 0.451                                       | 2.132      | 0.373      | 1.090          | 0.936           |
| problem_list:555.0                      | Regional enteritis of small intestine                                                                       | 0.450                                       |            | 0.571      | 0.322          | 0.178           |
| meds_reported:27713                     | AZATHIOPRINE 100 MG TAB                                                                                     | 0.440                                       |            | 0.559      | 0.435          | 0.289           |
| meds_administered:97513                 | POTASSIUM PHOSPHATE IN 0.9 % SODIUM CHLORIDE 15 MMOL/250 ML IV                                              | 0.438                                       |            | 0.134      | 0.168          | 0.062           |
| meds_administered:93427                 | HYDROCORTISONE SOD SUCCINATE (PF) 100 MG/2 ML SOLUTION FOR INJECTION                                        | 0.431                                       |            | 0.353      | 0.403          | 0.500           |
| problem_list:536.3                      | Gastroparesis                                                                                               | 0.430                                       |            | 0.561      | 0.398          | 0.213           |
| meds_reported:27423                     | ADALIMUMAB 40 MG/0.8 ML SUBCUTANEOUS SYRINGE KIT                                                            | 0.426                                       |            | 0.046      | 0.083          | 0.214           |
| problem_list:211.5                      | Benign neoplasm of liver and biliary passages                                                               | 0.424                                       | 2.888      |            | 0.405          | 0.077           |
| problem_list:528.00                     | Stomatitis and mucositis, unspecified                                                                       | 0.420                                       |            | 0.065      |                |                 |
| meds_administered:14993                 | MERCAPTOPYRINE 50 MG TAB                                                                                    | 0.420                                       |            | 0.425      | 0.491          | 0.278           |
| meds_administered:8256                  | ACYCLOVIR 800 MG TABLET                                                                                     | 0.411                                       |            | 0.168      | 0.194          | 0.211           |
| meds_administered:764                   | D5W WITH POTASSIUM CHLORIDE 20 MEQ/L IV                                                                     | 0.404                                       |            | 0.020      | 0.035          | 0.015           |
| problem_list:249.80                     | Secondary diabetes mellitus with other specified manifestations, not stated as uncontrolled, or unspecified | 0.402                                       |            | 0.362      | 0.140          | 0.052           |
| problem_list:338.19                     | Other acute pain                                                                                            | 0.384                                       |            | 0.069      | 0.275          | 0.113           |
| problem_list:564.89                     | Other functional disorders of intestine                                                                     | 0.379                                       |            | 0.327      | 0.445          | 0.152           |
| meds_administered:467                   | MEDROXYPROGESTERONE 10 MG TABLET                                                                            | 0.378                                       |            |            | 0.185          |                 |
| meds_administered:31131                 | SACCHAROMYCES BOULARDII 250 MG CAPSULE                                                                      | 0.376                                       |            | 0.704      | 0.486          | 0.787           |
| meds_administered:5093                  | CIPROFLOXACIN 400 MG/200 ML IN DEXTROSE 5 % INTRAVENOUS PIGGYBACK                                           | 0.376                                       |            | 0.156      | 0.156          | 0.187           |
| abnormal_labs:1401-IRON, SERUM          |                                                                                                             | 0.373                                       | 0.079      | 0.180      | 0.215          | 0.291           |
| abnormal_labs:2622-BLASTS               |                                                                                                             | 0.371                                       | 1.043      | 0.058      | 0.655          | 0.483           |
| meds_administered:400328                | SODIUM BICARBONATE INFUSION                                                                                 | 0.370                                       |            | 0.644      | 0.746          | 0.612           |
| meds_administered:27449                 | METHYLPREDNISOLONE SODIUM SUCC 40 MG/ML SOLUTION FOR INJECTION                                              | 0.369                                       |            |            |                | 0.244           |
| problem_list:446.6                      | Thrombotic microangiopathy                                                                                  | 0.368                                       |            |            |                |                 |
| problem_list:425.9                      | Secondary cardiomyopathy, unspecified                                                                       | 0.368                                       |            |            | 0.004          |                 |
| meds_administered:7810                  | TRAMADOL 50 MG TABLET                                                                                       | 0.362                                       |            |            | 0.003          | 0.174           |
| problem_list:368.13                     | Visual discomfort                                                                                           | 0.362                                       |            |            | 0.018          |                 |
| problem_list:294.9                      | Unspecified persistent mental disorders due to conditions classified elsewhere                              | 0.359                                       |            |            |                | 0.003           |
| abnormal_labs:210-ERYTHROCYTE SED. RATE |                                                                                                             | 0.355                                       | 0.184      | 0.092      | 0.160          | 0.224           |
| meds_reported:74491                     | MESALAMINE 1.2 G TABLET, DELAYED RELEASE                                                                    | 0.349                                       |            | 0.177      | 0.238          | 0.236           |
| meds_administered:5575                  | METOCLOPRAMIDE 5 MG/5 ML ORAL SOLN                                                                          | 0.343                                       |            |            | 0.015          |                 |
| meds_reported:56313                     | ONDANSETRON HCL ORAL                                                                                        | -0.340                                      |            | -0.061     | -0.861         | -0.530          |
| abnormal_labs:724-CORTISOL, SERUM       |                                                                                                             | 0.339                                       |            | 0.137      |                |                 |
| meds_reported:37780                     | MESALAMINE 1,000 MG RECTAL SUPPOSITORY                                                                      | 0.338                                       |            | 0.383      | 0.282          | 0.319           |
| meds_reported:38701                     | CALCIUM CARBONATE-VITAMIN D3 600 MG CALCIUM-200 UNIT CAPSULE                                                | 0.333                                       |            |            | 0.172          | 0.055           |
| meds_reported:10393                     | LORAZEPAM 0.5 MG TABLET                                                                                     | 0.328                                       |            |            |                | 0.024           |
| meds_reported:73128                     | ZINC SULFATE 220 MG (50 MG) CAP                                                                             | 0.326                                       |            | 0.382      | 0.522          | 0.403           |
| problem_list:293.0                      | Delirium due to conditions classified elsewhere                                                             | 0.325                                       |            | 0.161      | 0.291          | 0.174           |
| meds_reported:80973                     | FENOFIBRATE 120 MG TABLET                                                                                   | 0.324                                       |            | 0.896      | 1.332          | 1.155           |

| Variable                                | Description                                                            | Model coefficients for each case definition |            |            |                |                 |
|-----------------------------------------|------------------------------------------------------------------------|---------------------------------------------|------------|------------|----------------|-----------------|
|                                         |                                                                        | by ICD-9 code                               | by EIA (+) | by PCR (+) | EIA or PCR (+) | by any of these |
| meds_reported:58300                     | PREDNISONE ORAL                                                        | -0.323                                      |            |            | -0.080         | -0.253          |
| meds_reported:7901                      | MORPHINE (PF) 1 MG/ML INJECTION                                        | 0.321                                       |            | 1.166      | 0.604          | 0.095           |
| meds_administered:3641                  | DIATRIZOATE MEGLUMINE & SODIUM 66 %-10 % ORAL SOLN                     | 0.321                                       |            | 0.298      | 0.325          | 0.269           |
| meds_administered:7614                  | FELBAMATE 600 MG TABLET                                                | -0.320                                      |            |            |                |                 |
| meds_administered:3474                  | NYSTATIN 100,000 UNIT/G OINTMENT                                       | 0.317                                       |            | 0.417      | 0.400          | 0.351           |
| meds_administered:13192                 | FERROUS SULFATE 300 MG (60 MG IRON)/5 ML ORAL LIQUID                   | 0.310                                       |            | 0.195      | 0.115          | 0.337           |
| meds_administered:27485                 | BUPRENORPHINE 2 MG SUBLINGUAL TABLET                                   | 0.306                                       |            | 0.135      | 0.231          | 0.145           |
| meds_reported:31282                     | HYDROCORTISONE ACETATE 10 % (80 MG) RECTAL FOAM                        | -0.304                                      |            | -0.003     | -0.357         | -0.268          |
| meds_administered:17805                 | SCOPOLAMINE 1.5 MG 72 HR TRANSDERM PATCH                               | 0.303                                       |            |            |                |                 |
| meds_administered:9394                  | NEOMYCIN-BACITRACIN-POLYMYXN 3.5 MG-400 UNIT-10,000 UNIT/GRAM EYE OINT | -0.302                                      |            |            |                |                 |
| meds_administered:38797                 | SILDENAFIL 20 MG TABLET                                                | 0.300                                       |            |            |                |                 |
| meds_reported:77810                     | INSULIN LISPRO SUBQ                                                    | 0.298                                       |            | 0.132      | 0.063          | 0.019           |
| abnormal_labs:2618-BAND CELL            |                                                                        | 0.297                                       | 0.483      | 0.206      | 0.335          | 0.331           |
| meds_reported:13962                     | FUROSEMIDE 40 MG/5 ML ORAL SOLUTION                                    | 0.297                                       |            | 0.946      | 0.481          | 0.294           |
| problem_list:V42.81                     | Bone marrow replaced by transplant                                     | 0.294                                       |            |            |                | 0.137           |
| meds_administered:14894                 | BETAMETHASONE DIPROPIONATE 0.05 % TOPICAL CREAM                        | 0.294                                       |            |            | 0.124          |                 |
| meds_reported:10466                     | HYDROCORTISONE 100 MG SOLUTION FOR INJECTION                           | 0.290                                       |            |            |                |                 |
| meds_reported:79867                     | FOLIC ACID (BULK) MISC                                                 | -0.287                                      |            |            |                | -0.079          |
| abnormal_labs:1146-LACTATE, BLOOD       |                                                                        | 0.286                                       | -0.003     |            |                |                 |
| problem_list:278.1                      | Localized adiposity                                                    | 0.285                                       |            | 0.603      | 0.152          |                 |
| meds_administered:17145                 | BACITRACIN-POLYMYXIN B 500 UNIT-10,000 UNIT/G OINTMENT                 | 0.285                                       |            | 0.418      | 0.415          | 0.364           |
| meds_administered:10930                 | GENTAMICIN 0.3 % EYE DROPS                                             | 0.284                                       |            |            |                |                 |
| meds_reported:17829                     | METHYLPREDNISOLONE 4 MG TABLETS IN A DOSE PACK                         | 0.282                                       |            |            |                | 1.039           |
| meds_administered:7531                  | ENALAPRILAT 1.25 MG/ML IV                                              | 0.280                                       |            |            |                |                 |
| problem_list:428.1                      | Left heart failure                                                     | 0.278                                       |            | 0.008      | 0.036          |                 |
| problem_list:555.9                      | Regional enteritis of unspecified site                                 | 0.278                                       |            | 0.225      | 0.239          | 0.196           |
| meds_administered:12146                 | DEXTROSE 5 %-0.9 % SODIUM CHLORIDE IV                                  | 0.275                                       | 0.313      | 0.202      | 0.316          | 0.246           |
| meds_reported:1312                      | NYSTATIN 100,000 UNIT/ML ORAL SUSP                                     | 0.269                                       | -0.133     | 0.375      | 0.396          | 0.632           |
| meds_administered:76038                 | PEG 3350-ELECTROLYTES 240 G-22.72 G-6.72 G-5.84 G ORAL SOLUTION        | 0.269                                       |            | 0.009      |                | 0.180           |
| abnormal_labs:2662-TOTAL NUCLEATED CELL |                                                                        | 0.268                                       | -0.007     | 0.342      | 0.307          | 0.328           |
| meds_administered:400036                | FERRIC GLUCONATE IVPB                                                  | 0.262                                       | -0.314     |            |                | 0.004           |
| problem_list:789.00                     | Abdominal pain, unspecified site                                       | 0.259                                       |            | 0.224      | 0.278          | 0.237           |
| meds_administered:12214                 | ERYTHROMYCIN 5 MG/GRAM (0.5 %) EYE OINTMENT                            | 0.256                                       |            |            | 0.072          |                 |
| meds_administered:6918                  | AZATHIOPRINE 50 MG TABLET                                              | 0.251                                       |            |            |                | 0.017           |
| meds_administered:10113                 | POTASSIUM CHLORIDE 10 MEQ/100 ML IV PIGGY BACK                         | 0.249                                       |            | 0.299      | 0.333          | 0.310           |
| meds_reported:14993                     | MERCAPTOPYRINE 50 MG TAB                                               | 0.245                                       |            | 0.233      | 0.246          | 0.223           |
| meds_reported:111338                    | CLONIDINE HCL (BULK) MISC                                              | -0.240                                      |            |            |                |                 |
| meds_reported:8251                      | GLYCERIN (CHILD) RECTAL SUPPOSITORY                                    | -0.238                                      |            |            |                |                 |
| abnormal_labs:2693-MONOCYTE             |                                                                        | 0.238                                       | 0.369      | 0.150      | 0.318          | 0.344           |
| meds_reported:20636                     | MODAFINIL 100 MG TAB                                                   | 0.236                                       |            |            |                | 0.359           |
| meds_administered:31282                 | HYDROCORTISONE ACETATE 10 % (80 MG) RECTAL FOAM                        | 0.235                                       |            |            |                | 0.034           |
| meds_reported:9438                      | ALENDRONATE 35 MG TAB                                                  | 0.232                                       |            |            | 0.138          | 0.009           |
| problem_list:788.62                     | Slowing of urinary stream                                              | 0.230                                       |            |            | 0.005          |                 |

| Variable                                   | Description                                                          | Model coefficients for each case definition |            |            |                |                 |
|--------------------------------------------|----------------------------------------------------------------------|---------------------------------------------|------------|------------|----------------|-----------------|
|                                            |                                                                      | by ICD-9 code                               | by EIA (+) | by PCR (+) | EIA or PCR (+) | by any of these |
| problem_list:788.63                        | Urgency of urination                                                 | 0.221                                       | 0.188      |            | 0.245          | 0.050           |
| meds_administered:18681                    | ONDANSETRON 4 MG DISINTEGRATING TABLET                               | 0.217                                       | 0.175      | 0.127      | 0.288          | 0.236           |
| meds_administered:13236                    | WARFARIN 2 MG TABLET                                                 | 0.216                                       |            | 0.195      | 0.345          | 0.152           |
| problem_list:438.89                        | Other late effects of cerebrovascular disease                        | 0.215                                       |            |            |                |                 |
| problem_list:599.60                        | Urinary obstruction, unspecified                                     | 0.214                                       |            | 0.929      | 1.189          | 0.984           |
| meds_reported:36912                        | MESALAMINE ER 500 MG CAP                                             | 0.209                                       |            | 0.319      | 0.328          | 0.081           |
| meds_reported:38613                        | FENTANYL 12 MCG/HR TRANSDERM PATCH                                   | 0.209                                       |            | 0.424      | 0.318          | 0.240           |
| meds_administered:400532                   | METHYLPREDNISOLONE IV BURETROL SYRINGE 62.5 MG/ML STERILE DIL        | 0.204                                       |            |            | 0.076          |                 |
| meds_administered:20478                    | TACROLIMUS 0.5 MG CAP                                                | 0.198                                       |            | 0.201      | 0.330          | 0.568           |
| problem_list:781.94                        | Facial weakness                                                      | 0.196                                       |            |            |                |                 |
| meds_administered:13309                    | CARBAMAZEPINE 100 MG CHEWABLE TAB                                    | 0.194                                       |            |            |                |                 |
| problem_list:434.01                        | Cerebral thrombosis with cerebral infarction                         | 0.193                                       |            | 1.000      | 1.270          | 1.096           |
| meds_administered:9940                     | POTASSIUM CHLORIDE 20 MEQ ORAL PACKET                                | 0.191                                       |            | 0.226      | 0.276          | 0.224           |
| meds_reported:93023                        | LEVOTHYROXINE 125 MCG CAP                                            | 0.191                                       |            |            | 0.033          |                 |
| abnormal_labs:1140-PROTEIN TOTAL           |                                                                      | 0.190                                       | 0.113      | 0.133      | 0.150          | 0.201           |
| problem_list:472.0                         | Chronic rhinitis                                                     | 0.190                                       | 0.464      |            |                |                 |
| meds_reported:18681                        | ONDANSETRON 4 MG DISINTEGRATING TABLET                               | 0.189                                       |            |            |                |                 |
| problem_list:333.90                        | Unspecified extrapyramidal disease and abnormal movement disorder    | 0.188                                       | 0.417      |            | 0.127          |                 |
| problem_list:238.4                         | Polycythemia vera                                                    | 0.187                                       |            | 0.561      | 0.378          | 0.280           |
| meds_reported:8022                         | BECLOMETHASONE DIPROPIONATE 80 MCG/ACTUATION AEROSOL INHALER         | 0.186                                       |            |            | 0.278          | 1.343           |
| meds_reported:18508                        | PHENOBARB-HYOSCYAMN-ATROPINE-SCOP 16.2 MG-0.1037 MG-0.0194 MG TABLET | 0.186                                       |            |            |                |                 |
| abnormal_labs:2104-HGB A2                  |                                                                      | -0.185                                      |            |            | -0.159         | -0.358          |
| meds_reported:12204                        | PANTOPRAZOLE 40 MG TAB, DELAYED RELEASE                              | 0.185                                       |            | 0.272      | 0.289          | 0.250           |
| meds_reported:9120                         | DRONABINOL 2.5 MG CAP                                                | 0.184                                       |            |            |                |                 |
| problem_list:173.31                        | Basal cell carcinoma of skin of other and unspecified parts of face  | 0.181                                       |            |            |                |                 |
| meds_administered:5292                     | PREDNISONE 5 MG TABLET                                               | 0.180                                       |            | 0.060      | 0.048          | 0.012           |
| problem_list:V49.76                        | Above knee amputation status                                         | 0.179                                       |            |            |                |                 |
| meds_administered:400183                   | MELPHALAN CHEMO INFUSION                                             | 0.178                                       |            | 0.047      |                |                 |
| meds_administered:747                      | MESALAMINE 4 GRAM/60 ML ENEMA                                        | -0.174                                      |            |            |                |                 |
| meds_reported:13235                        | PREDNISONE 50 MG TABLET                                              | 0.171                                       |            |            | 0.123          |                 |
| problem_list:477.8                         | Allergic rhinitis due to other allergen                              | 0.171                                       |            |            |                |                 |
| problem_list:332.0                         | Paralysis agitans                                                    | 0.168                                       | 0.206      |            | 0.120          | 0.102           |
| meds_administered:22475                    | B-COMPLEX WITH VITAMIN C CAP                                         | 0.166                                       |            | 0.355      | 0.504          | 0.379           |
| problem_list:596.51                        | Hypertonicity of bladder                                             | 0.165                                       | 0.106      | 0.432      | 0.845          | 0.700           |
| meds_reported:13236                        | WARFARIN 2 MG TABLET                                                 | 0.165                                       |            | 0.027      |                |                 |
| meds_reported:19388                        | DICYCLOMINE 10 MG CAP                                                | 0.164                                       |            | 0.055      | 0.201          | 0.004           |
| meds_administered:400284                   | SODIUM CHLORIDE 0.9 % IV BOLUS                                       | 0.163                                       | -0.113     | 0.183      | 0.146          | 0.138           |
| abnormal_labs:2805-KETONE                  |                                                                      | 0.162                                       | 0.081      | 0.132      | 0.165          | 0.129           |
| abnormal_labs:1403-TIBC                    |                                                                      | 0.162                                       |            | 0.028      | 0.057          | 0.130           |
| meds_reported:9554                         | OXYCODONE-ACETAMINOPHEN 5 MG-325 MG TABLET                           | 0.162                                       |            | 0.106      | 0.157          | 0.133           |
| abnormal_labs:2620-MYELOCYTE               |                                                                      | 0.162                                       |            |            |                | 0.019           |
| meds_administered:9742                     | AMILORIDE 5 MG TAB                                                   | 0.160                                       |            |            |                |                 |
| meds_administered:18265                    | CARBIDOPA 25 MG-LEVODOPA 100 MG TABLET                               | 0.157                                       |            |            |                |                 |
| abnormal_labs:2619-METAMYELOCYTE           |                                                                      | 0.155                                       | 0.100      | 0.096      | 0.106          | 0.125           |
| problem_list:799.3                         | Debility, unspecified                                                | 0.154                                       | 0.515      |            |                |                 |
| admission_sources:Non Health Care Facility |                                                                      | -0.149                                      | -0.144     | -0.113     | -0.163         | -0.184          |

| Variable                                   | Description                                                                  | Model coefficients for each case definition |               |               |                   |                    |
|--------------------------------------------|------------------------------------------------------------------------------|---------------------------------------------|---------------|---------------|-------------------|--------------------|
|                                            |                                                                              | by ICD-9<br>code                            | by EIA<br>(+) | by PCR<br>(+) | EIA or<br>PCR (+) | by any<br>of these |
| meds_administered:35104                    | MIRTAZAPINE 7.5 MG TABLET                                                    | 0.145                                       |               |               |                   |                    |
| meds_administered:15788                    | BUMETANIDE 1 MG TABLET                                                       | 0.144                                       |               |               |                   |                    |
| admission_sources:Transfer from a Hospital |                                                                              | 0.144                                       | 0.229         | 0.189         | 0.260             | 0.329              |
| meds_reported:16390                        | PRAVASTATIN 20 MG TABLET                                                     | 0.143                                       |               |               |                   |                    |
| meds_administered:20623                    | ESOMEPRAZOLE MAGNESIUM 20<br>MG CAP, DELAYED RELEASE                         | 0.142                                       |               |               | 0.056             | 0.163              |
| meds_reported:45341                        | CITRACAL + D ORAL                                                            | 0.141                                       |               |               | 0.013             |                    |
| meds_reported:11960                        | DEXAMETHASONE 2 MG TABLET                                                    | 0.140                                       |               |               |                   |                    |
| meds_administered:12287                    | MIRTAZAPINE 30 MG TABLET                                                     | 0.139                                       |               |               |                   |                    |
| meds_administered:400160                   | HYDROMORPHONE IVPB<br>(RESTRICTED DOSING)                                    | 0.137                                       |               |               |                   | 0.169              |
| abnormal_labs:4277-HEPATITIS C VIRUS AB    |                                                                              | 0.136                                       |               |               |                   |                    |
| abnormal_labs:1105-ALBUMIN                 |                                                                              | 0.134                                       | 0.272         | 0.170         | 0.235             | 0.209              |
| meds_administered:6958                     | HETASTARCH 6 % IN 0.9 % SODIUM<br>CHLORIDE IV                                | 0.134                                       |               |               |                   |                    |
| meds_administered:1879                     | METOCLOPRAMIDE 5 MG/ML<br>INJECTION                                          | 0.133                                       | 0.108         |               | 0.038             | 0.026              |
| meds_reported:108285                       | PHENYLEPHRINE 0.25 %-MINERAL<br>OIL 14 %-PETROLATM 74.9 %<br>RECTAL OINTMENT | 0.131                                       |               |               |                   |                    |
| meds_reported:12421                        | FERROUS SULFATE 325 MG (65 MG<br>IRON) TAB                                   | 0.131                                       |               | 0.273         | 0.269             | 0.193              |
| meds_reported:27464                        | GLUCOSAMINE-CHONDROIT-VIT C-<br>MN 500 MG-400 MG CAPSULE                     | 0.130                                       |               |               |                   |                    |
| meds_reported:11681                        | CARBAMAZEPINE ER 200 MG 12 HR<br>TAB                                         | 0.128                                       |               |               | 0.090             |                    |
| problem_list:006.9                         | Amebiasis, unspecified                                                       | 0.123                                       |               |               | 0.234             | 0.069              |
| meds_administered:83364                    | CEFEPIME 2 GRAM/100 ML IN<br>DEXTROSE (ISO-OSMOTIC)<br>INTRAVENOUS PIGGYBACK | 0.123                                       |               | 0.408         | 0.374             | 0.270              |
| meds_reported:6941                         | PHENYTOIN SODIUM EXTENDED 100<br>MG CAPSULE                                  | 0.122                                       |               |               | 0.299             | 0.484              |
| meds_reported:55965                        | NOVOLOG MIX 70-30 SUBQ                                                       | 0.121                                       |               |               |                   |                    |
| problem_list:294.21                        | Dementia, unspecified, with behavioral<br>disturbance                        | 0.120                                       | 1.462         |               |                   |                    |
| abnormal_labs:1783-LIPASE                  |                                                                              | 0.119                                       | 0.157         |               | 0.030             | 0.051              |
| meds_administered:4702                     | FAMOTIDINE 40 MG TABLET                                                      | 0.119                                       |               | 0.193         | 0.342             | 0.190              |
| meds_reported:49280                        | FLAGYL ORAL                                                                  | 0.119                                       |               |               |                   |                    |
| problem_list:787.20                        | Dysphagia, unspecified                                                       | 0.118                                       | -0.096        | 0.264         | 0.151             | 0.294              |
| admission_sources:Emergency<br>Room        |                                                                              | 0.118                                       | 0.078         | 0.037         | 0.081             | 0.080              |
| meds_reported:29117                        | ASCORBIC ACID 500 MG/5 ML SYRUP                                              | 0.118                                       |               |               |                   |                    |
| meds_administered:1077                     | TUBERCULIN PPD 5 TUB. UNIT/0.1<br>ML INTRADERMAL INJECTION<br>SOLUTION       | 0.117                                       |               |               |                   |                    |
| meds_reported:54203                        | METOPROLOL SUCCINATE ORAL                                                    | 0.116                                       |               | 0.241         | 0.226             | 0.115              |
| meds_administered:10685                    | LEVOTHYROXINE 200 MCG<br>INTRAVENOUS SOLUTION                                | 0.116                                       |               |               |                   |                    |
| meds_reported:19453                        | CALCITRIOL 0.25 MCG CAPSULE                                                  | 0.114                                       |               | 0.543         | 0.529             | 0.548              |
| problem_list:780.61                        | Fever presenting with conditions<br>classified elsewhere                     | 0.112                                       |               | 0.177         | 0.194             | 0.074              |
| meds_administered:400165                   | IMIPENEM-CILASTATIN 250 MG IVPB                                              | 0.111                                       |               | 0.088         | 0.178             | 0.003              |
| meds_reported:21104                        | WHITE PETROLATUM-MINERAL OIL<br>TOPICAL CREAM                                | -0.110                                      |               |               | -0.027            |                    |
| meds_reported:24788                        | HEPARIN (PORCINE) 5,000 UNIT/0.5<br>ML SYRINGE                               | 0.109                                       |               | 0.110         | 0.080             | 0.122              |
| abnormal_labs:20243-LYMPHOCYTE             |                                                                              | 0.108                                       |               |               |                   |                    |
| meds_reported:855                          | FENTANYL 50 MCG/HR TRANSDERM<br>PATCH                                        | 0.107                                       |               |               | 0.236             | 0.058              |
| meds_administered:14016                    | NPH INSULIN HUMAN RECOMB 100<br>UNIT/ML SUSP, SUB-Q INJ                      | 0.106                                       |               |               |                   |                    |
| meds_reported:44104                        | CALCITRIOL ORAL                                                              | 0.106                                       |               |               |                   |                    |
| meds_administered:24201                    | VORICONAZOLE 200 MG TABLET                                                   | 0.106                                       |               | 0.178         |                   | 0.193              |
| meds_reported:57784                        | PIRACETAM (BULK) MISC                                                        | -0.102                                      |               |               | -0.456            | -0.075             |
| meds_administered:4432                     | FLUCONAZOLE 200 MG TABLET                                                    | 0.099                                       |               | 0.412         | 0.375             | 0.286              |



| Variable                               | Description                                                                                                        | Model coefficients for each case definition |            |            |                |                 |
|----------------------------------------|--------------------------------------------------------------------------------------------------------------------|---------------------------------------------|------------|------------|----------------|-----------------|
|                                        |                                                                                                                    | by ICD-9 code                               | by EIA (+) | by PCR (+) | EIA or PCR (+) | by any of these |
| problem_list:E933.1                    | Antineoplastic and immunosuppressive drugs causing adverse effects in therapeutic use                              | -0.098                                      |            | -0.012     | -0.210         | -0.308          |
| problem_list:793.6                     | Nonspecific (abnormal) findings on radiological and other examination of abdominal area, including retroperitoneum | 0.096                                       |            | 0.139      |                |                 |
| meds_reported:6524                     | CODEINE 15 MG TABLET                                                                                               | -0.096                                      |            |            |                | -0.183          |
| meds_administered:16822                | SODIUM CHLORIDE 0.9 % INTRAVENOUS SOLUTION                                                                         | 0.090                                       |            | 0.077      | 0.054          | 0.063           |
| meds_reported:12221                    | VENLAFAXINE 37.5 MG TABLET                                                                                         | 0.088                                       |            |            |                |                 |
| meds_administered:14951                | DOCUSATE SODIUM 100 MG CAPSULE                                                                                     | -0.086                                      | -0.044     | -0.059     | -0.090         | -0.108          |
| problem_list:281.9                     | Unspecified deficiency anemia                                                                                      | 0.084                                       |            |            |                |                 |
| problem_list:V58.65                    | Long-term (current) use of steroids                                                                                | 0.084                                       |            |            |                |                 |
| meds_reported:12097                    | BISACODYL 10 MG RECTAL SUPPOSITORY                                                                                 | -0.082                                      |            |            |                |                 |
| meds_administered:19073                | HEPARIN (PORCINE) 5,000 UNIT/ML INJECTION                                                                          | 0.082                                       |            | 0.064      | 0.044          | 0.058           |
| abnormal_labs:2608-RED DISTRIB. WIDTH  |                                                                                                                    | 0.082                                       | 0.162      | 0.075      | 0.133          | 0.137           |
| meds_reported:12069                    | FERROUS GLUCONATE 325 MG (37 MG IRON) TABLET                                                                       | 0.080                                       |            | 0.140      | 0.238          | 0.094           |
| problem_list:726.32                    | Lateral epicondylitis                                                                                              | 0.079                                       | 1.400      |            |                |                 |
| meds_administered:400656               | TPN ADULT                                                                                                          | 0.079                                       |            | 1.017      | 1.031          | 1.026           |
| meds_administered:300040               | GRADE 0 MOUTHWASH                                                                                                  | 0.077                                       |            | 0.304      | 0.245          | 0.216           |
| abnormal_labs:5808-TROPONIN-I          |                                                                                                                    | -0.075                                      |            |            | -0.055         | -0.092          |
| abnormal_labs:2612-LYMPHOCYTE          |                                                                                                                    | 0.074                                       | 0.067      | 0.064      | 0.100          | 0.174           |
| problem_list:745.2                     | Tetralogy of fallot                                                                                                | 0.073                                       | 0.153      |            |                |                 |
| problem_list:V49.75                    | Below knee amputation status                                                                                       | 0.072                                       |            |            | 0.106          | 0.012           |
| meds_administered:94225                | LACTULOSE 20 GRAM/30 ML ORAL SOLN                                                                                  | 0.070                                       |            | 0.128      | 0.187          | 0.134           |
| problem_list:719.54                    | Stiffness of joint, not elsewhere classified, hand                                                                 | 0.070                                       |            | 0.251      |                |                 |
| meds_administered:5819                 | LACTATED RINGERS IV                                                                                                | -0.069                                      |            | -0.064     | -0.087         | -0.102          |
| meds_administered:26050                | ESCITALOPRAM 10 MG TAB                                                                                             | 0.069                                       |            |            |                |                 |
| abnormal_labs:113-WB POTASSIUM - VEN   |                                                                                                                    | 0.068                                       |            | 0.009      |                |                 |
| meds_administered:14455                | FENTANYL (PF) 50 MCG/ML INJECTION                                                                                  | -0.067                                      |            | -0.016     | -0.031         | -0.050          |
| abnormal_labs:2661-RBC                 |                                                                                                                    | 0.067                                       |            | 0.126      | 0.133          | 0.169           |
| abnormal_labs:2610-MEAN PLT VOLUME     |                                                                                                                    | 0.066                                       |            | 0.005      |                | 0.033           |
| problem_list:710.8                     | Other specified diffuse diseases of connective tissue                                                              | 0.065                                       |            |            |                |                 |
| abnormal_labs:1150-UREA NITROGEN       |                                                                                                                    | 0.065                                       | 0.088      | 0.074      | 0.104          | 0.122           |
| meds_administered:37694                | OXYTOCIN 20 UNIT/1000 ML IN 0.9 % SODIUM CHLORIDE IV                                                               | -0.064                                      |            | -0.063     | -0.082         | -0.091          |
| meds_reported:17957                    | ZINC SULFATE 220 MG CAPSULE                                                                                        | 0.063                                       |            |            |                |                 |
| surgery_cases:CHOLECYSTECTOMY          |                                                                                                                    | 0.063                                       |            |            |                |                 |
| problem_list:205.02                    | Acute myeloid leukemia, in relapse                                                                                 | 0.063                                       |            | 0.659      | 0.833          | 0.567           |
| meds_reported:12392                    | TELMISARTAN 40 MG TABLET                                                                                           | 0.061                                       |            |            | 0.083          |                 |
| abnormal_labs:2652-LYMPHOCYTE %        |                                                                                                                    | 0.060                                       | 0.113      | 0.024      | 0.099          | 0.124           |
| meds_administered:17305                | HYDROXYCHLOROQUINE 200 MG TABLET                                                                                   | 0.059                                       |            |            |                |                 |
| abnormal_labs:2621-PROMYELOCYTE        |                                                                                                                    | 0.058                                       | 1.021      |            |                |                 |
| meds_administered:689                  | FUROSEMIDE 10 MG/ML INJECTION                                                                                      | -0.058                                      |            |            |                |                 |
| meds_reported:42825                    | BACTRIM DS ORAL                                                                                                    | -0.055                                      |            |            | -0.062         |                 |
| meds_reported:12524                    | CONJUGATED ESTROGENS 0.625 MG/GRAM VAGINAL CREAM                                                                   | 0.055                                       |            |            | 0.103          |                 |
| meds_administered:1933                 | ROPINIROLE 1 MG TABLET                                                                                             | 0.051                                       |            |            |                |                 |
| meds_reported:97819                    | GEL BASE NO.41 (BULK)                                                                                              | 0.047                                       |            | 0.045      |                |                 |
| abnormal_labs:3369-WB CA++ - ART(POCT) |                                                                                                                    | -0.047                                      |            |            |                |                 |
| meds_administered:1464                 | PREDNISONE 10 MG TABLET                                                                                            | 0.045                                       |            | 0.074      | 0.102          |                 |
| meds_administered:8113                 | KETOROLAC 30 MG/ML (1 ML) INJECTION                                                                                | -0.045                                      |            | -0.063     | -0.085         | -0.092          |
| problem_list:V44.1                     | Gastrostomy status                                                                                                 | 0.044                                       |            | 0.002      |                | 0.152           |

| Variable                                        | Description                                                    | Model coefficients for each case definition |            |            |                |                 |
|-------------------------------------------------|----------------------------------------------------------------|---------------------------------------------|------------|------------|----------------|-----------------|
|                                                 |                                                                | by ICD-9 code                               | by EIA (+) | by PCR (+) | EIA or PCR (+) | by any of these |
| meds_administered:10518                         | CEFAZOLIN IN DEXTROSE (ISO-OSMOTIC) 1 GRAM/50 ML IV PIGGY BACK | -0.043                                      |            | -0.009     | -0.019         | -0.037          |
| meds_reported:10262                             | PRIMIDONE 250 MG TABLET                                        | 0.039                                       |            |            |                |                 |
| meds_reported:26086                             | SODIUM OXYBATE 500 MG/ML ORAL SOLUTION                         | -0.039                                      |            |            | -0.306         | -0.032          |
| meds_administered:19767                         | ELECTROLYTE-A IV                                               | -0.038                                      |            | -0.003     | -0.020         | -0.037          |
| meds_administered:1311                          | SENNOSIDES 8.6 MG TABLET                                       | -0.036                                      |            |            | -0.027         | -0.059          |
| meds_reported:53194                             | LOMOTIL ORAL                                                   | 0.036                                       |            |            |                |                 |
| meds_administered:300121                        | METOPROLOL TARTRATE 12.5 MG HALF TABLET                        | 0.036                                       |            |            |                |                 |
| abnormal_labs:20852-LYMPHOCYTE                  |                                                                | 0.035                                       |            |            |                |                 |
| problem_list:276.8                              | Hypopotassemia                                                 | 0.035                                       |            |            |                | 0.096           |
| problem_list:786.50                             | Chest pain, unspecified                                        | -0.035                                      | -0.013     |            | -0.034         | -0.046          |
| meds_administered:400304                        | CUSTOM IV FLUID                                                | 0.034                                       |            | 0.109      | 0.079          | 0.080           |
| meds_reported:2417                              | CLINDAMYCIN 300 MG CAPSULE                                     | 0.034                                       |            |            |                |                 |
| problem_list:283.9                              | Acquired hemolytic anemia, unspecified                         | -0.034                                      |            |            |                |                 |
| meds_administered:5511                          | SODIUM CHLORIDE 0.45 % INTRAVENOUS SOLUTION                    | -0.033                                      |            | -0.049     | -0.090         | -0.099          |
| abnormal_labs:1116-CALCIUM                      |                                                                | 0.033                                       | 0.075      | 0.004      | 0.010          | 0.014           |
| abnormal_labs:6006-HEMOGLOBIN A1C               |                                                                | -0.033                                      | -0.027     |            | -0.056         | -0.069          |
| meds_reported:14588                             | MINOXIDIL 10 MG TABLET                                         | 0.032                                       |            |            |                |                 |
| meds_administered:19453                         | CALCITRIOL 0.25 MCG CAPSULE                                    | 0.031                                       |            | 0.098      | 0.103          | 0.018           |
| abnormal_labs:1127-GLUCOSE                      |                                                                | -0.029                                      |            |            | -0.013         | -0.034          |
| problem_list:713.5                              | Arthropathy associated with neurological disorders             | 0.029                                       |            |            | 0.025          |                 |
| meds_administered:400106                        | LORAZEPAM IVPB                                                 | 0.028                                       |            | 0.325      | 0.682          | 0.798           |
| problem_list:625.8                              | Other specified symptoms associated with female genital organs | 0.027                                       | 0.872      | 0.220      | 0.724          | 0.573           |
| abnormal_labs:250-PRO TIME                      |                                                                | 0.027                                       | 0.053      | 0.168      | 0.168          | 0.169           |
| abnormal_labs:1409-TRANSFERRIN SAT              |                                                                | 0.027                                       |            |            | 0.020          |                 |
| abnormal_labs:2692-LYMPHOCYTE                   |                                                                | 0.025                                       | 0.070      | 0.039      | 0.095          | 0.115           |
| abnormal_labs:6691-BRAIN NATRIURETIC PEPTIDE    |                                                                | -0.025                                      | 0.090      |            |                |                 |
| meds_administered:7611                          | SULFAMETHOXAZOLE 800 MG-TRIMETHOPRIM 160 MG TABLET             | 0.024                                       |            |            |                |                 |
| meds_reported:4464                              | DONEPEZIL 10 MG TABLET                                         | 0.023                                       |            | 0.039      | 0.061          |                 |
| meds_reported:84721                             | APRISO ORAL                                                    | -0.022                                      |            |            |                |                 |
| abnormal_labs:3363-WB K - ART (POCT)            |                                                                | -0.021                                      |            |            |                |                 |
| meds_reported:6258                              | BACITRACIN 500 UNIT/GRAM TOPICAL OINTMENT                      | 0.020                                       |            | 0.336      | 0.466          | 0.349           |
| abnormal_labs:3364-HEMATOCRIT-ART(POCT)         |                                                                | -0.020                                      |            |            |                |                 |
| problem_list:742.51                             | Diastematomyelia                                               | -0.020                                      |            |            |                |                 |
| problem_list:401.9                              | Unspecified essential hypertension                             | -0.020                                      | -0.159     |            | -0.020         | -0.034          |
| problem_list:584.9                              | Acute kidney failure, unspecified                              | 0.018                                       |            | 0.090      | 0.033          | 0.078           |
| problem_list:288.66                             | Bandemia                                                       | -0.018                                      |            |            |                |                 |
| age_over89:Y                                    |                                                                | 0.017                                       | 0.124      |            |                | 0.020           |
| age_over89:N                                    |                                                                | -0.017                                      | -0.124     |            |                | -0.020          |
| meds_administered:15419                         | ASPIRIN 81 MG CHEWABLE TABLET                                  | -0.017                                      | -0.150     |            | -0.038         | -0.046          |
| abnormal_labs:2691-NEUTROPHIL                   |                                                                | 0.017                                       | 0.139      |            | 0.094          | 0.100           |
| meds_administered:9554                          | OXYCODONE-ACETAMINOPHEN 5 MG-325 MG TABLET                     | -0.017                                      | -0.012     | -0.022     | -0.045         | -0.049          |
| abnormal_labs:3279-WB GLUCOSE-VEN (GEM - MPOCT) |                                                                | -0.017                                      |            |            | -0.079         | -0.106          |
| admission_sources:Physician Referral            |                                                                | -0.015                                      | -0.104     |            | -0.054         | -0.060          |
| admission_sources:Clinic                        |                                                                | -0.015                                      | -0.104     |            | -0.054         | -0.060          |
| problem_list:786.05                             | Shortness of breath                                            | -0.015                                      |            |            |                |                 |
| abnormal_labs:2655-BASOPHIL %                   |                                                                | 0.014                                       | 0.004      |            |                |                 |
| problem_list:724.8                              | Other symptoms referable to back                               | 0.014                                       |            |            |                |                 |
| problem_list:V22.1                              | Supervision of other normal pregnancy                          | -0.014                                      |            |            | -0.032         | -0.047          |
| problem_list:733.01                             | Senile osteoporosis                                            | 0.013                                       |            |            |                |                 |
| problem_list:372.53                             | Conjunctival xerosis                                           | 0.013                                       | 0.459      |            |                |                 |
| problem_list:278.00                             | Obesity, unspecified                                           | -0.013                                      | -0.074     | -0.001     | -0.121         | -0.131          |
| problem_list:428.22                             | Chronic systolic heart failure                                 | 0.013                                       |            |            | 0.014          | 0.093           |
| problem_list:272.4                              | Other and unspecified hyperlipidemia                           | -0.012                                      | -0.125     |            | -0.041         | -0.052          |
| meds_reported:11398                             | CIPROFLOXACIN 0.3 % EYE DROPS                                  | 0.011                                       |            |            |                |                 |

| Variable                                       | Description                                                                   | Model coefficients for each case definition |            |            |                |                 |
|------------------------------------------------|-------------------------------------------------------------------------------|---------------------------------------------|------------|------------|----------------|-----------------|
|                                                |                                                                               | by ICD-9 code                               | by EIA (+) | by PCR (+) | EIA or PCR (+) | by any of these |
| problem_list:V22.0                             | Supervision of normal first pregnancy                                         | -0.010                                      |            | -0.005     | -0.041         | -0.055          |
| abnormal_labs:3277-WB GLUCOSE-ART (POCT)       |                                                                               | -0.010                                      |            |            |                |                 |
| abnormal_labs:1074-CK-MB MASS                  |                                                                               | -0.010                                      |            |            | -0.006         | -0.033          |
| problem_list:414.00                            | Coronary atherosclerosis of unspecified type of vessel, native or graft       | -0.010                                      | -0.098     |            | -0.055         | -0.074          |
| problem_list:202.80                            | Other malignant lymphomas, unspecified site, extranodal and solid organ sites | 0.009                                       | 0.643      |            | 0.129          | 0.164           |
| abnormal_labs:1131-MAGNESIUM                   |                                                                               | 0.009                                       | 0.028      |            |                |                 |
| abnormal_labs:106-WB UREA NITROGEN-VEN         |                                                                               | 0.007                                       |            |            |                |                 |
| meds_administered:1475                         | VENLAFAXINE ER 75 MG CAPSULE,EXTENDED RELEASE 24 HR                           | 0.006                                       | 1.174      |            |                |                 |
| problem_list:097.9                             | Syphilis, unspecified                                                         | 0.006                                       |            |            |                |                 |
| meds_administered:73300                        | PEG 3350-ELECTROLYTES-VITAMIN C 100 G-7.5 G-2.691 G-4.7 G POWDER PACK         | 0.004                                       |            |            |                | 0.003           |
| abnormal_labs:3279-WB GLUCOSE-VEN (POCT)       |                                                                               | -0.004                                      |            | -0.018     |                |                 |
| abnormal_labs:105-WB CO2 - VEN                 |                                                                               | 0.004                                       |            |            |                |                 |
| problem_list:782.3                             | Edema                                                                         | 0.003                                       |            | 0.081      | 0.009          |                 |
| abnormal_labs:3317-O2 SATURATION - VEN         |                                                                               | 0.002                                       | -0.038     | 0.077      |                |                 |
| abnormal_labs:1138-POTASSIUM                   |                                                                               | 0.002                                       | 0.015      |            |                |                 |
| age                                            |                                                                               | 0.00019                                     | 0.0035     | 0.00054    | 0.0025         | 0.0021          |
| meds_reported:49448                            | FLUCONAZOLE ORAL                                                              |                                             | 7.315      |            | 1.720          | 1.518           |
| problem_list:269.1                             | Deficiency of other vitamins                                                  |                                             | 7.154      |            | 6.986          | 6.658           |
| meds_reported:2499                             | CIPROFLOXACIN 750 MG TABLET                                                   |                                             | 6.756      |            | 0.369          | 0.113           |
| problem_list:458.8                             | Other specified hypotension                                                   |                                             | 5.645      |            | 2.726          | 2.532           |
| surgery_cases:NEPHRECTOMY/TRANSPLANT           |                                                                               |                                             | 5.207      |            | 4.465          | 4.206           |
| meds_reported:28525                            | MORPHINE (PF) 10 MG/ML INJECTION                                              |                                             | 5.080      |            | 3.532          | 3.390           |
| meds_reported:72925                            | IRON (FERROUS SULFATE) ORAL                                                   |                                             | 4.908      |            | 0.275          |                 |
| problem_list:997.61                            | Neuroma of amputation stump                                                   |                                             | 4.888      |            | 5.283          | 5.041           |
| meds_reported:63727                            | VELCADE IV                                                                    |                                             | 4.788      |            | 2.026          | 1.737           |
| surgery_cases:ESOPHAGEAL DIVERTICULECTOMY OPEN |                                                                               |                                             | 4.576      |            | 4.451          | 4.230           |
| meds_administered:450                          | HALOPERIDOL 0.5 MG TAB                                                        |                                             | 4.481      |            |                |                 |
| problem_list:V70.8                             | Other specified general medical examinations                                  |                                             | 4.414      | 0.443      | 2.412          | 2.159           |
| surgery_cases:VESSEL REPAIR/UPPER EXTREMITY    |                                                                               |                                             | 4.220      |            | 3.719          | 3.421           |
| problem_list:786.00                            | Respiratory abnormality, unspecified                                          |                                             | 4.004      |            | 2.644          | 2.381           |
| problem_list:151.0                             | Malignant neoplasm of cardia                                                  |                                             | 3.683      |            | 1.105          | 0.903           |
| meds_reported:20712                            | DILTIAZEM 90 MG TAB                                                           |                                             | 3.590      | 0.413      | 1.320          | 1.130           |
| meds_reported:391                              | AMOXICILLIN 500 MG CAP                                                        |                                             | 3.445      |            |                |                 |
| meds_reported:62668                            | TRAVATAN OPHT                                                                 |                                             | 3.428      |            |                |                 |
| meds_reported:79819                            | BRIMONIDINE-TIMOLOL OPHT                                                      |                                             | 3.385      |            | 5.725          | 6.046           |
| surgery_cases:FEMORAL ARTERY ANEURYSM REPAIR   |                                                                               |                                             | 3.383      |            | 2.513          | 2.261           |
| problem_list:958.3                             | Posttraumatic wound infection not elsewhere classified                        |                                             | 3.150      |            | 0.789          | 0.595           |
| abnormal_labs:1255-U-CREATININE (RANDOM)       |                                                                               |                                             | 2.988      |            | 3.188          | 2.929           |
| meds_reported:31171                            | TADALAFIL 20 MG TABLET                                                        |                                             | 2.953      |            |                |                 |
| meds_reported:17771                            | LETROZOLE 2.5 MG TABLET                                                       |                                             | 2.907      |            |                |                 |
| abnormal_labs:20282-D-DIMER                    |                                                                               |                                             | 2.864      |            | 0.469          | 0.242           |
| surgery_cases:CRANIOTOMY AVM                   |                                                                               |                                             | 2.858      |            | 1.148          | 0.874           |
| meds_reported:12916                            | DIPHENHYDRAMINE 25 MG TABLET                                                  |                                             | 2.771      |            | 0.179          | 0.025           |
| problem_list:780.94                            | Early satiety                                                                 |                                             | 2.494      |            | 0.508          | 0.305           |
| meds_reported:5575                             | METOCLOPRAMIDE 5 MG/5 ML ORAL SOLN                                            |                                             | 2.443      |            | 0.194          | 0.176           |
| surgery_cases:THORACOTOMY/ADULT                |                                                                               |                                             | 2.430      |            | 0.392          | 0.243           |
| problem_list:820.21                            | Closed fracture of intertrochanteric section of neck of femur                 |                                             | 2.414      |            |                |                 |
| meds_administered:5277                         | DOCUSATE SODIUM 283 MG ENEMA                                                  |                                             | 2.382      |            | 0.850          | 0.706           |
| meds_administered:2736                         | PHYTONADIONE 10 MG/ML INJECTION SOLUTION                                      |                                             | 2.377      |            | 0.197          | 0.109           |
| meds_reported:29664                            | OMEPRAZOLE MAGNESIUM 20 MG TAB, DELAYED RELEASE                               |                                             | 2.365      |            | 0.361          | 0.050           |

| Variable                                                     | Description                                                                             | Model coefficients for each case definition |               |               |                   |                    |
|--------------------------------------------------------------|-----------------------------------------------------------------------------------------|---------------------------------------------|---------------|---------------|-------------------|--------------------|
|                                                              |                                                                                         | by ICD-9<br>code                            | by EIA<br>(+) | by PCR<br>(+) | EIA or<br>PCR (+) | by any<br>of these |
| meds_reported:7905                                           | RISPERIDONE 3 MG TABLET                                                                 |                                             | 2.310         |               |                   |                    |
| abnormal_labs:8420-ABS T CYTO/SUPP                           |                                                                                         |                                             | 2.281         |               | 2.057             | 1.917              |
| meds_reported:1942                                           | VENLAFAXINE 75 MG TABLET                                                                |                                             | 2.262         |               | 0.205             | 0.116              |
| abnormal_labs:8450-% T HELPER                                |                                                                                         |                                             | 2.223         |               | 1.981             | 1.825              |
| meds_reported:62831                                          | TRICOR ORAL                                                                             |                                             | 1.947         |               | 0.729             | 0.531              |
| problem_list:117.3                                           | Aspergillosis                                                                           |                                             | 1.742         |               | 1.482             | 1.269              |
| problem_list:275.2                                           | Disorders of magnesium metabolism                                                       |                                             | 1.660         |               | 0.158             |                    |
| problem_list:789.34                                          | Abdominal or pelvic swelling, mass, or lump, left lower quadrant                        |                                             | -1.552        |               |                   |                    |
| surgery_cases:ANEURYSM /AORTO/THORACO ABDOMINAL REPAIR       |                                                                                         |                                             | 1.527         | 1.186         | 1.624             | 1.452              |
| meds_reported:12886                                          | HYDROCODONE-ACETAMINOPHEN 7.5 MG-750 MG TABLET                                          |                                             | 1.493         |               |                   |                    |
| surgery_cases:NEPHRECTOMY PARTIAL ROBOTIC                    |                                                                                         |                                             | 1.432         |               |                   |                    |
| problem_list:053.10                                          | Herpes zoster with unspecified nervous system complication                              |                                             | -1.405        |               |                   |                    |
| abnormal_labs:8416-ABS TOTAL T CELLS                         |                                                                                         |                                             | -1.387        |               | -0.044            | -0.141             |
| abnormal_labs:1164-PHENOBARBITAL                             |                                                                                         |                                             | 1.375         |               |                   |                    |
| meds_reported:54206                                          | METOPROLOL TARTRATE ORAL                                                                |                                             | 1.370         |               |                   |                    |
| problem_list:201.90                                          | Hodgkin's disease, unspecified type, unspecified site, extranodal and solid organ sites |                                             | 1.357         |               |                   |                    |
| problem_list:972.1                                           | Poisoning by cardiotoxic glycosides and drugs of similar action                         |                                             | -1.335        |               |                   |                    |
| problem_list:440.9                                           | Generalized and unspecified atherosclerosis                                             |                                             | 1.321         |               |                   |                    |
| meds_reported:7896                                           | TRIAMTERENE-HYDROCHLOROTHIAZIDE 37.5 MG-25 MG CAP                                       |                                             | 1.278         |               |                   |                    |
| problem_list:154.0                                           | Malignant neoplasm of rectosigmoid junction                                             |                                             | 1.255         |               |                   |                    |
| meds_reported:37109                                          | MVI, ADULT NO.1 WITH VIT K 1 MG-5 MCG-10 MG-200MG-150MCG IV                             |                                             | -1.176        |               |                   |                    |
| problem_list:357.0                                           | Acute infective polyneuritis                                                            |                                             | 1.137         |               |                   |                    |
| problem_list:V46.11                                          | Dependence on respirator, status                                                        |                                             | -1.096        | 0.661         | 0.569             | 0.516              |
| problem_list:780.99                                          | Other general symptoms                                                                  |                                             | 1.096         |               | 0.201             | 0.071              |
| problem_list:V44.3                                           | Colostomy status                                                                        |                                             | 1.096         |               | 0.664             | 0.495              |
| problem_list:V44.0                                           | Tracheostomy status                                                                     |                                             | 1.079         |               | 0.318             | 0.027              |
| meds_reported:8523                                           | GLIMEPIRIDE 1 MG TABLET                                                                 |                                             | 1.056         |               |                   |                    |
| meds_reported:12784                                          | NYSTATIN 100,000 UNIT/G TOPICAL CREAM                                                   |                                             | 1.047         |               |                   |                    |
| abnormal_labs:2553-INR                                       |                                                                                         |                                             | 1.044         |               |                   |                    |
| problem_list:322.9                                           | Meningitis, unspecified                                                                 |                                             | 1.043         |               |                   |                    |
| abnormal_labs:8423-HELPER/SUPPRESSOR                         |                                                                                         |                                             | -1.036        |               | -1.325            | -0.977             |
| abnormal_labs:8458-ABS T HELPER                              |                                                                                         |                                             | -1.031        |               | -0.555            | -0.492             |
| admission_sources:Transfer from Another Health Care Facility |                                                                                         |                                             | 0.998         |               | 0.379             | 0.232              |
| surgery_cases:EXPLORATORY LAP/GS                             |                                                                                         |                                             | 0.997         |               | 0.658             | 0.488              |
| problem_list:747.60                                          | Anomaly of the peripheral vascular system, unspecified site                             |                                             | 0.955         |               |                   |                    |
| meds_administered:400588                                     | ENALAPRILAT IVPB                                                                        |                                             | 0.955         |               |                   |                    |
| meds_reported:11170                                          | VALPROIC ACID (AS SODIUM SALT) 250 MG/5 ML SYRUP                                        |                                             | 0.954         |               |                   | 0.442              |
| meds_reported:80981                                          | CALCIUM CARBONATE-VITAMIN D3 200 MG (500 MG)-400 UNIT TABLET                            |                                             | -0.946        |               |                   |                    |
| abnormal_labs:4271-HEPATITIS BS AG                           |                                                                                         |                                             | 0.946         |               |                   |                    |
| meds_administered:287                                        | CYCLOBENZAPRINE 10 MG TABLET                                                            |                                             | 0.927         |               |                   |                    |
| meds_reported:75453                                          | SITAGLIPTIN-METFORMIN 50 MG-500 MG TAB                                                  |                                             | 0.906         |               |                   |                    |
| surgery_cases:COLONOSCOPY                                    |                                                                                         |                                             | 0.904         | 0.180         | 1.251             | 1.086              |
| problem_list:792.1                                           | Nonspecific abnormal findings in stool contents                                         |                                             | 0.868         |               | 0.167             | 0.061              |
| surgery_cases:VULVECTOMY/PARTIAL                             |                                                                                         |                                             | 0.859         | 0.204         | 0.981             | 0.764              |
| surgery_cases:LARYNGOSCOPY W/BIOPSY                          |                                                                                         |                                             | 0.834         |               |                   |                    |
| meds_reported:46190                                          | COUMADIN ORAL                                                                           |                                             | 0.834         |               |                   |                    |

| Variable                                                     | Description                                                                           | Model coefficients for each case definition |            |            |                |                 |
|--------------------------------------------------------------|---------------------------------------------------------------------------------------|---------------------------------------------|------------|------------|----------------|-----------------|
|                                                              |                                                                                       | by ICD-9 code                               | by EIA (+) | by PCR (+) | EIA or PCR (+) | by any of these |
| surgery_cases:LARYNGOSCOPY/MICRO                             |                                                                                       |                                             | 0.827      |            | 0.165          | 0.025           |
| meds_administered:29686                                      | POTASSIUM CHLORIDE ER 10 MEQ TAB, PARTICLES/CRYSTALS                                  |                                             | 0.802      |            |                |                 |
| abnormal_labs:817-IG A QUANT                                 |                                                                                       |                                             | 0.785      |            |                |                 |
| problem_list:781.3                                           | Lack of coordination                                                                  |                                             | 0.766      |            |                |                 |
| abnormal_labs:2813-CASTS                                     |                                                                                       |                                             | 0.761      |            | 0.333          | 0.283           |
| problem_list:275.09                                          | Other disorders of iron metabolism                                                    |                                             | 0.759      |            |                |                 |
| problem_list:V46.2                                           | Other dependence on machines, supplemental oxygen                                     |                                             | 0.722      | 0.152      | 0.923          | 0.761           |
| meds_administered:400187                                     | MIDAZOLAM INFUSION ADULT                                                              |                                             | 0.719      |            |                |                 |
| meds_administered:3596                                       | SULFAMETHOXAZOLE 400 MG-TRIMETHOPRIM 80 MG TABLET                                     |                                             | 0.683      |            |                |                 |
| surgery_cases:SIGMOID RESECTION/GS                           |                                                                                       |                                             | 0.673      | 0.326      | 0.861          | 0.686           |
| problem_list:228.00                                          | Hemangioma of unspecified site                                                        |                                             | 0.667      |            |                |                 |
| meds_administered:39154                                      | PREGABALIN 75 MG CAP                                                                  |                                             | 0.662      |            |                |                 |
| surgery_cases:UPPER ENDOSCOPY/DOUBLE BALLOON ENTEROSCOPY     |                                                                                       |                                             | 0.657      | 1.574      | 1.144          | 0.858           |
| meds_administered:13402                                      | URSODIOL 300 MG CAP                                                                   |                                             | 0.652      | 0.166      | 0.202          | 0.219           |
| problem_list:252.01                                          | Primary hyperparathyroidism                                                           |                                             | 0.620      |            | 0.105          |                 |
| abnormal_labs:5067-VITAMIN B12, SERUM                        |                                                                                       |                                             | 0.609      |            |                |                 |
| problem_list:588.89                                          | Other specified disorders resulting from impaired renal function                      |                                             | -0.609     |            |                |                 |
| problem_list:511.81                                          | Malignant pleural effusion                                                            |                                             | 0.580      |            | 1.037          | 0.877           |
| surgery_cases:HYPERTHERMIC PERITONEAL PERFUSION CHEMOTHERAPY |                                                                                       |                                             | 0.547      | 0.640      | 0.868          | 0.724           |
| problem_list:358.00                                          | Myasthenia gravis without (acute) exacerbation                                        |                                             | 0.540      |            |                |                 |
| problem_list:209.60                                          | Benign carcinoid tumor of unknown primary site                                        |                                             | 0.533      |            |                |                 |
| problem_list:150.9                                           | Malignant neoplasm of esophagus, unspecified site                                     |                                             | 0.532      |            | 0.029          |                 |
| surgery_cases:LEG AMPUTATION/BKA                             |                                                                                       |                                             | -0.503     |            | -0.142         | -0.091          |
| problem_list:305.00                                          | Alcohol abuse, unspecified                                                            |                                             | 0.501      |            |                |                 |
| meds_administered:36397                                      | CALCIUM ACETATE 667 MG CAP                                                            |                                             | -0.478     |            |                |                 |
| abnormal_labs:1254-U-UREA (RANDOM)                           |                                                                                       |                                             | -0.475     |            |                |                 |
| meds_administered:4067                                       | WARFARIN 7.5 MG TABLET                                                                |                                             | 0.459      |            |                |                 |
| surgery_cases:HIP FRACTURE/ORIF                              |                                                                                       |                                             | 0.457      |            |                |                 |
| problem_list:182.0                                           | Malignant neoplasm of corpus uteri, except isthmus                                    |                                             | 0.454      |            | 0.188          | 0.105           |
| problem_list:794.31                                          | Nonspecific abnormal electrocardiogram [ECG] [EKG]                                    |                                             | 0.453      |            |                |                 |
| meds_reported:42786                                          | BACID ORAL                                                                            |                                             | 0.449      | 1.859      | 2.455          | 2.216           |
| abnormal_labs:1730-PREALBUMIN                                |                                                                                       |                                             | 0.432      | 0.221      | 0.431          | 0.415           |
| problem_list:530.10                                          | Esophagitis, unspecified                                                              |                                             | 0.427      |            |                |                 |
| problem_list:805.8                                           | Closed fracture of unspecified vertebral column without mention of spinal cord injury |                                             | 0.424      |            |                |                 |
| problem_list:564.81                                          | Neurogenic bowel                                                                      |                                             | 0.403      |            | 0.063          |                 |
| surgery_cases:LIVER RESECTION PARTIAL/LAPA/RMTI              |                                                                                       |                                             | 0.398      |            |                |                 |
| meds_reported:36651                                          | GABAPENTIN 100 MG TAB                                                                 |                                             | 0.388      |            |                |                 |
| meds_reported:56741                                          | OXYCODONE ORAL                                                                        |                                             | 0.380      |            |                |                 |
| meds_reported:5544                                           | CLONAZEPAM 1 MG TABLET                                                                |                                             | 0.374      |            |                |                 |
| abnormal_labs:1135-PHOSPHORUS                                |                                                                                       |                                             | 0.374      |            | 0.143          | 0.115           |
| meds_administered:7474                                       | DIVALPROEX 500 MG TAB, DELAYED RELEASE                                                |                                             | 0.361      |            |                |                 |
| problem_list:521.00                                          | Dental caries, unspecified                                                            |                                             | 0.340      |            |                |                 |
| meds_reported:10091                                          | CITALOPRAM 20 MG TABLET                                                               |                                             | 0.336      |            |                |                 |
| problem_list:272.2                                           | Mixed hyperlipidemia                                                                  |                                             | 0.322      |            | 0.078          | 0.176           |
| surgery_cases:GASTRECTOMY/SUBTOTAL                           |                                                                                       |                                             | 0.321      |            |                |                 |
| problem_list:515                                             | Postinflammatory pulmonary fibrosis                                                   |                                             | 0.281      |            | 0.065          |                 |
| abnormal_labs:8069-HAPTOGLOBIN                               |                                                                                       |                                             | -0.276     |            |                | -0.046          |
| abnormal_labs:2872-WBC                                       |                                                                                       |                                             | 0.274      |            |                |                 |
| meds_administered:16711                                      | ZIPRASIDONE 40 MG CAPSULE                                                             |                                             | 0.267      |            | 0.068          |                 |
| surgery_cases:COLECTOMY/HEMI/RIGHT/LAPAROSCOPY               |                                                                                       |                                             | 0.263      |            |                |                 |

| Variable                                                 | Description                                                                                 | Model coefficients for each case definition |            |            |                |                 |
|----------------------------------------------------------|---------------------------------------------------------------------------------------------|---------------------------------------------|------------|------------|----------------|-----------------|
|                                                          |                                                                                             | by ICD-9 code                               | by EIA (+) | by PCR (+) | EIA or PCR (+) | by any of these |
| meds_administered:6580                                   | HALOPERIDOL 1 MG TABLET                                                                     |                                             | -0.260     |            |                |                 |
| abnormal_labs:1274-FERRITIN                              |                                                                                             |                                             | 0.253      |            |                | 0.023           |
| abnormal_labs:7903-TESTOSTERONE                          |                                                                                             |                                             | -0.250     |            |                |                 |
|                                                          | OMEGA-3 ACID ETHYL ESTERS 1                                                                 |                                             |            |            |                |                 |
| meds_administered:39228                                  | GRAM CAPSULE                                                                                |                                             | -0.245     |            |                |                 |
| abnormal_labs:1301-OSMOLALITY SERUM                      |                                                                                             |                                             | 0.244      |            | 0.058          |                 |
| problem_list:799.89                                      | Other ill-defined conditions                                                                |                                             | 0.243      |            |                |                 |
| surgery_cases:SMALL BOWEL RESECTION/GS                   |                                                                                             |                                             | 0.240      |            |                |                 |
| surgery_cases:NASAL RECONSTRUCTION/PLAS                  |                                                                                             |                                             | -0.237     |            |                |                 |
| meds_administered:39153                                  | PREGABALIN 50 MG CAPSULE                                                                    |                                             | 0.236      |            |                |                 |
| problem_list:611.71                                      | Mastodynia                                                                                  |                                             | 0.230      |            |                |                 |
|                                                          | Diabetes with renal manifestations, type II or unspecified type, not stated as uncontrolled |                                             |            |            |                |                 |
| problem_list:250.40                                      |                                                                                             |                                             | 0.223      | 0.116      | 0.364          | 0.272           |
|                                                          | NORETHINDRONE (CONTRACEPTIVE) 0.35 MG TABLET                                                |                                             | -0.221     |            |                |                 |
| meds_reported:18197                                      |                                                                                             |                                             | -0.221     |            |                |                 |
| abnormal_labs:3315-HCO3 - VEN                            |                                                                                             |                                             | 0.213      |            |                |                 |
| problem_list:790.92                                      | Abnormal coagulation profile                                                                |                                             | -0.210     |            |                |                 |
| abnormal_labs:306-WB UREA NITROGEN-ART                   |                                                                                             |                                             | 0.209      |            |                |                 |
| meds_reported:16711                                      | ZIPRASIDONE 40 MG CAPSULE                                                                   |                                             | 0.205      |            | 1.172          | 0.899           |
| problem_list:250.4                                       |                                                                                             |                                             | -0.198     |            | -0.228         | -0.031          |
| problem_list:808.8                                       | Closed unspecified fracture of pelvis                                                       |                                             | -0.195     |            |                |                 |
|                                                          | DARBEPOETIN ALFA 150 MCG/0.3 ML IN POLYSORBATE SYRINGE                                      |                                             | -0.188     |            |                |                 |
| meds_reported:73061                                      |                                                                                             |                                             | -0.188     |            |                |                 |
| problem_list:799.02                                      | Hypoxemia                                                                                   |                                             | 0.186      |            |                |                 |
| abnormal_labs:4369-WB CA++ - VEN(POCT)                   |                                                                                             |                                             | 0.185      |            | 0.101          | 0.104           |
| surgery_cases:CRANIOTOMY/SUBDURAL HEMATOMA               |                                                                                             |                                             | 0.185      |            |                |                 |
| problem_list:518.81                                      | Acute respiratory failure                                                                   |                                             | -0.181     | 0.177      | 0.042          |                 |
| problem_list:621.9                                       | Unspecified disorder of uterus                                                              |                                             | -0.178     |            |                |                 |
| problem_list:282.69                                      | Other sickle-cell disease with crisis                                                       |                                             | -0.175     |            |                |                 |
| abnormal_labs:8800-PROTEIN TOTAL                         |                                                                                             |                                             | -0.172     |            |                | -0.060          |
|                                                          | FENTANYL 12 MCG/HR TRANSDERM PATCH                                                          |                                             | -0.164     |            |                |                 |
| meds_administered:38613                                  |                                                                                             |                                             | -0.164     |            |                |                 |
| abnormal_labs:2816-BACTERIA                              |                                                                                             |                                             | 0.163      |            | 0.048          | 0.041           |
| abnormal_labs:798-PTH, INTACT                            |                                                                                             |                                             | 0.162      |            |                |                 |
| problem_list:183.0                                       | Malignant neoplasm of ovary                                                                 |                                             | 0.158      |            | 0.117          | 0.023           |
| abnormal_labs:1121-CREATININE                            |                                                                                             |                                             | 0.153      | 0.018      | 0.072          | 0.066           |
| abnormal_labs:2617-SEGMENTED CELLS                       |                                                                                             |                                             | 0.146      | 0.149      | 0.227          | 0.156           |
| meds_administered:17971                                  | DILTIAZEM 30 MG TAB                                                                         |                                             | 0.145      |            |                |                 |
| problem_list:276.51                                      | Dehydration                                                                                 |                                             | -0.145     |            |                |                 |
| abnormal_labs:824-BASIC T CELL                           |                                                                                             |                                             | -0.143     |            |                |                 |
| abnormal_labs:1130-LD(LDH)                               |                                                                                             |                                             | 0.140      |            | 0.042          | 0.053           |
|                                                          | PHENOBARBITAL 20 MG/5 ML ORAL ELIXIR                                                        |                                             | -0.138     |            |                |                 |
| meds_reported:3051                                       |                                                                                             |                                             | -0.138     |            |                |                 |
| abnormal_labs:3281-WB LACTATE-ART (POCT)                 |                                                                                             |                                             | 0.137      | 0.032      | 0.123          | 0.085           |
|                                                          | Obstructive sleep apnea (adult)(pediatric)                                                  |                                             | 0.136      |            |                |                 |
| problem_list:327.23                                      |                                                                                             |                                             | 0.136      |            |                |                 |
| admission_sources:Transfer from MS Acute Unit to Hospice |                                                                                             |                                             | 0.133      |            |                |                 |
| meds_administered:19195                                  | TACROLIMUS 1 MG CAPSULE                                                                     |                                             | 0.127      | 0.093      | 0.264          | 0.230           |
|                                                          | Malignant neoplasm of stomach, unspecified site                                             |                                             |            |            |                |                 |
| problem_list:151.9                                       |                                                                                             |                                             | 0.124      |            | 0.084          | 0.014           |
| abnormal_labs:1137-GAMMA G T                             |                                                                                             |                                             | 0.124      | 0.013      | 0.116          | 0.103           |
| problem_list:276.1                                       | Hyposmolality and/or hyponatremia                                                           |                                             | -0.122     |            |                |                 |
| abnormal_labs:2838-LEUKOCYTE ESTERASE                    |                                                                                             |                                             | 0.120      |            | 0.035          | 0.071           |
|                                                          | FLUTICASONE-SALMETEROL 500 MCG-50 MCG/DOSE DISK DEVICE FOR INHALATION                       |                                             | 0.119      |            |                |                 |
| meds_administered:13644                                  |                                                                                             |                                             | 0.119      |            |                |                 |
| problem_list:585.6                                       | End stage renal disease                                                                     |                                             | -0.119     | 0.234      | 0.144          | 0.158           |
| problem_list:744.4                                       |                                                                                             |                                             | -0.117     |            |                |                 |
| abnormal_labs:309-WB IONIZED CA - ART                    |                                                                                             |                                             | 0.116      |            | 0.047          | 0.028           |
| surgery_cases:LIVER TRANSPLANT/ADULT                     |                                                                                             |                                             | 0.113      | 0.347      | 0.519          | 0.394           |
| abnormal_labs:4374-BASE EX - VEN(POCT)                   |                                                                                             |                                             | 0.111      |            |                |                 |
| abnormal_labs:4362-WB NA - VEN (POCT)                    |                                                                                             |                                             | 0.108      |            |                |                 |
| problem_list:571.8                                       | Other chronic nonalcoholic liver disease                                                    |                                             | 0.107      |            |                |                 |

| Variable                                 | Description                                                                                                | Model coefficients for each case definition |            |            |                |                 |
|------------------------------------------|------------------------------------------------------------------------------------------------------------|---------------------------------------------|------------|------------|----------------|-----------------|
|                                          |                                                                                                            | by ICD-9 code                               | by EIA (+) | by PCR (+) | EIA or PCR (+) | by any of these |
| surgery_cases:HYSTERECTOMY/SUPRACERVICAL |                                                                                                            |                                             | 0.104      |            |                |                 |
| meds_reported:847                        | MULTIVITAMIN ORAL LIQUID                                                                                   |                                             | 0.103      |            |                |                 |
| problem_list:415.19                      | Other pulmonary embolism and infarction                                                                    |                                             | 0.103      |            |                |                 |
| meds_reported:8439                       | PHENYTOIN 125 MG/5 ML ORAL SUSPENSION                                                                      |                                             | -0.101     |            |                |                 |
| problem_list:733                         |                                                                                                            |                                             | 0.099      |            |                |                 |
| meds_reported:24201                      | VORICONAZOLE 200 MG TABLET                                                                                 |                                             | -0.097     |            |                |                 |
| problem_list:695.89                      | Other specified erythematous conditions                                                                    |                                             | 0.096      |            |                |                 |
| problem_list:434.91                      | Cerebral artery occlusion, unspecified with cerebral infarction                                            |                                             | -0.095     | 0.020      |                |                 |
| meds_administered:4401                   | LORAZEPAM 2 MG/ML INJECTION                                                                                |                                             | -0.094     | 0.042      | 0.008          |                 |
| problem_list:564.00                      | Constipation, unspecified                                                                                  |                                             | -0.093     |            | -0.029         | -0.035          |
| abnormal_labs:1134-ALK.PHOSPHATASE       |                                                                                                            |                                             | 0.093      | 0.012      | 0.064          | 0.053           |
| problem_list:530.81                      | Esophageal reflux                                                                                          |                                             | -0.092     |            |                |                 |
| meds_administered:76032                  | ZINC OXIDE-ALOE VERA-VITAMIN E ACETATE 11.3% TOPICAL CREAM                                                 |                                             | -0.090     |            |                |                 |
| abnormal_labs:5520-NUCLEATE RBC%         |                                                                                                            |                                             | 0.090      |            | 0.181          | 0.058           |
| problem_list:V42.0                       | Kidney replaced by transplant                                                                              |                                             | -0.085     |            | -0.062         |                 |
| abnormal_labs:357-PROTHROMBIN TIME - SL  |                                                                                                            |                                             | 0.085      |            | 0.178          | 0.206           |
| problem_list:710.0                       | Systemic lupus erythematosus                                                                               |                                             | -0.083     |            |                |                 |
| abnormal_labs:3313-pO2 - VEN             |                                                                                                            |                                             | -0.080     | 0.053      |                |                 |
| abnormal_labs:818-IG G QUANT             |                                                                                                            |                                             | -0.080     |            |                |                 |
| problem_list:284.1                       |                                                                                                            |                                             | -0.079     |            |                |                 |
| abnormal_labs:3311-pH - VEN              |                                                                                                            |                                             | -0.078     |            |                |                 |
| problem_list:305.1                       | Tobacco use disorder                                                                                       |                                             | -0.076     |            |                |                 |
| meds_administered:21305                  | FAMOTIDINE (PF) 20 MG/50 ML IN 0.9 % NACL (ISO) INTRAVENOUS PIGGYBACK                                      |                                             | -0.076     |            |                |                 |
| problem_list:789.01                      | Abdominal pain, right upper quadrant                                                                       |                                             | 0.076      |            |                |                 |
| abnormal_labs:20915-ABS NEUTROPHIL COUNT |                                                                                                            |                                             | -0.076     |            | -0.016         |                 |
| surgery_cases:LIVER SEGMENT LOBECT/RMTI  |                                                                                                            |                                             | -0.070     |            |                |                 |
| abnormal_labs:301-WB GLUCOSE - ART       |                                                                                                            |                                             | 0.070      |            |                |                 |
| problem_list:562.11                      | Diverticulitis of colon (without mention of hemorrhage)                                                    |                                             | 0.063      |            |                |                 |
| abnormal_labs:1194-DIGOXIN               |                                                                                                            |                                             | -0.063     |            | -0.012         |                 |
| problem_list:285.9                       | Anemia, unspecified                                                                                        |                                             | -0.060     |            |                |                 |
| meds_administered:1451                   | ACETAMINOPHEN 325 MG TABLET                                                                                |                                             | -0.058     |            |                |                 |
| problem_list:682.7                       | Cellulitis and abscess of foot, except toes                                                                |                                             | -0.056     |            |                |                 |
| problem_list:453.40                      | Acute venous embolism and thrombosis of unspecified deep vessels of lower extremity                        |                                             | 0.055      |            |                |                 |
| meds_reported:59417                      | RENAGEL ORAL                                                                                               |                                             | -0.054     |            |                |                 |
| problem_list:250.00                      | Diabetes mellitus without mention of complication, type II or unspecified type, not stated as uncontrolled |                                             | -0.053     |            |                | -0.004          |
| meds_administered:19136                  | DEXTROSE 5 % AND 0.45 % SODIUM CHLORIDE IV                                                                 |                                             | -0.049     |            |                |                 |
| problem_list:389.9                       | Unspecified hearing loss                                                                                   |                                             | -0.047     |            |                |                 |
| problem_list:496                         | Chronic airway obstruction, not elsewhere classified                                                       |                                             | 0.047      |            |                |                 |
| problem_list:268.9                       | Unspecified vitamin D deficiency                                                                           |                                             | -0.046     |            |                | -0.009          |
| meds_administered:77                     | MULTIVITAMIN TABLET                                                                                        |                                             | -0.046     |            | -0.068         | -0.082          |
| meds_reported:35995                      | ALBUTEROL SULFATE 2.5 MG/0.5 ML SOLUTION FOR NEBULIZATION                                                  |                                             | 0.046      |            |                |                 |
| abnormal_labs:104-WB CHLORIDE - VEN      |                                                                                                            |                                             | 0.044      |            |                |                 |
| meds_reported:51604                      | INSULIN GLARGINE SUBQ                                                                                      |                                             | -0.044     |            |                |                 |
| abnormal_labs:2528-D-DIMER               |                                                                                                            |                                             | -0.044     |            |                |                 |
| problem_list:070.70                      | Unspecified viral hepatitis C without hepatic coma                                                         |                                             | -0.043     | 0.126      |                | 0.005           |
| abnormal_labs:304-WB CHLORIDE - ART      |                                                                                                            |                                             | 0.043      |            |                | 0.212           |
| abnormal_labs:2606-MEAN CORP. HGB        |                                                                                                            |                                             | -0.042     |            | -0.015         | -0.020          |
| meds_administered:1131                   | HYDROXYUREA 500 MG CAPSULE                                                                                 |                                             | -0.041     |            |                |                 |

| Variable                                    | Description                                        | Model coefficients for each case definition |            |            |                |                 |
|---------------------------------------------|----------------------------------------------------|---------------------------------------------|------------|------------|----------------|-----------------|
|                                             |                                                    | by ICD-9 code                               | by EIA (+) | by PCR (+) | EIA or PCR (+) | by any of these |
| problem_list:239.0                          | Neoplasm of unspecified nature of digestive system |                                             | 0.041      | 0.078      | 0.396          | 0.262           |
| abnormal_labs:2807-BLOOD                    |                                                    |                                             | 0.040      |            | 0.003          |                 |
| problem_list:300.00                         | Anxiety state, unspecified                         |                                             | -0.039     |            |                |                 |
| abnormal_labs:4373-pO2 - VEN (POCT)         |                                                    |                                             | 0.037      |            |                |                 |
| problem_list:424.1                          | Aortic valve disorders                             |                                             | -0.036     |            |                |                 |
| problem_list:011.90                         | Pulmonary tuberculosis, unspecified, unspecified   |                                             | 0.036      |            | 0.125          |                 |
| problem_list:784.0                          | Headache                                           |                                             | -0.034     |            |                |                 |
| problem_list:428.0                          | Congestive heart failure, unspecified              |                                             | -0.032     | 0.079      | 0.005          |                 |
| abnormal_labs:2651-NEUTROPHIL %             |                                                    |                                             | 0.032      |            | 0.000          | 0.008           |
| problem_list:724.5                          | Backache, unspecified                              |                                             | -0.031     |            |                |                 |
| problem_list:733.00                         | Osteoporosis, unspecified                          |                                             | -0.029     |            |                | -0.003          |
| meds_administered:18722                     | SODIUM CHLORIDE 0.9 % FOR NEBULIZATION             |                                             | 0.029      |            |                |                 |
| problem_list:791.0                          | Proteinuria                                        |                                             | -0.028     |            |                |                 |
| abnormal_labs:251-APTT                      |                                                    |                                             | 0.026      | 0.049      | 0.039          | 0.002           |
| meds_administered:400001                    | ZZ IMS TEMPLATE                                    |                                             | -0.025     |            |                |                 |
| problem_list:585.4                          | Chronic kidney disease, Stage IV (severe)          |                                             | -0.020     |            |                |                 |
| abnormal_labs:3376-TOT CO2-ART (POCT)       |                                                    |                                             | 0.017      |            |                |                 |
| problem_list:493.90                         | Asthma, unspecified type, unspecified              |                                             | -0.016     |            | -0.014         |                 |
| meds_reported:13658                         | CALCIUM CARBONATE 400 MG CHEWABLE TAB              |                                             | -0.016     |            |                |                 |
| meds_administered:23929                     | ENOXAPARIN 30 MG/0.3 ML SUB-Q SYRINGE              |                                             | 0.016      |            |                |                 |
| abnormal_labs:2874-LYMPH                    |                                                    |                                             | 0.015      |            |                |                 |
| abnormal_labs:3316-TOTAL CO2 - VEN          |                                                    |                                             | -0.015     |            |                |                 |
| abnormal_labs:3301-pH - ART                 |                                                    |                                             | 0.015      |            |                |                 |
| problem_list:V53.8                          | Fitting and adjustment of wheelchair               |                                             | -0.014     |            |                |                 |
| problem_list:416.8                          | Other chronic pulmonary heart diseases             |                                             | 0.014      |            | 0.009          |                 |
| problem_list:V59.6                          | Liver donors                                       |                                             | -0.014     |            |                |                 |
| problem_list:054.10                         | Genital herpes, unspecified                        |                                             | 0.014      |            |                |                 |
| abnormal_labs:4279-HEPATITIS A VIRUS TOTAL  |                                                    |                                             | -0.013     |            |                |                 |
| problem_list:311                            | Depressive disorder, not elsewhere classified      |                                             | -0.012     |            |                |                 |
| meds_reported:15914                         | FOLIC ACID 1 MG TABLET                             |                                             | -0.011     |            |                |                 |
| admission_sources:Information Not Available |                                                    |                                             | 0.010      |            | 0.006          |                 |
| abnormal_labs:2815-CLUMPS                   |                                                    |                                             | 0.010      |            |                |                 |
| meds_administered:4000                      | MYCOPHENOLATE MOFETIL 250 MG CAPSULE               |                                             | 0.009      |            |                |                 |
| meds_administered:7372                      | ALBUMIN, HUMAN 5 % IV                              |                                             | 0.007      | 0.141      | 0.222          | 0.186           |
| gender:Male                                 |                                                    |                                             | 0.005      |            |                |                 |
| gender:Female                               |                                                    |                                             | -0.005     |            |                |                 |
| problem_list:780.52                         | Insomnia, unspecified                              |                                             | -0.004     |            | -0.010         |                 |
| abnormal_labs:1144-SODIUM                   |                                                    |                                             | 0.004      | 0.025      | 0.022          |                 |
| problem_list:280.9                          | Iron deficiency anemia, unspecified                |                                             | 0.002      |            |                |                 |
| meds_reported:100591                        | LUTEIN 20 MG TABLET                                |                                             |            | 6.629      | 7.157          | 6.914           |
| meds_reported:600609                        | GCO                                                |                                             |            | 6.553      | 7.122          | 6.831           |
| problem_list:197.1                          | Secondary malignant neoplasm of mediastinum        |                                             |            | 6.085      | 3.036          | 2.954           |
| meds_reported:2536                          | ACETAMINOPHEN 160 MG/5 ML ORAL LIQUID              |                                             |            | 5.597      | 5.111          | 5.243           |
| meds_reported:400919                        | ACETAMINOPHEN 650 MG IN STERILE DILUENT 65 ML IVPB |                                             |            | 5.580      | 6.407          | 6.170           |
| problem_list:077.1                          | Epidemic keratoconjunctivitis                      |                                             |            | 5.547      | 6.267          | 6.103           |
| meds_reported:43905                         | BUMEX ORAL                                         |                                             |            | 5.447      | 5.858          | 5.751           |
| meds_reported:400941                        | CEFAZOLIN IN 150 ML D5W IVPB                       |                                             |            | 5.099      | 5.731          | 5.585           |
| meds_reported:1997                          | INDINAVIR 400 MG CAP                               |                                             |            | 5.050      | 3.261          | 3.229           |
| meds_reported:3925                          | DANAZOL 50 MG CAP                                  |                                             |            | 4.996      | 5.153          | 4.786           |
| problem_list:256.39                         | Other ovarian failure                              |                                             |            | 4.993      | 4.496          | 4.260           |
| meds_reported:10793                         | LODOXAMIDE TROMETHAMINE 0.1 % EYE DROPS            |                                             |            | 4.987      | 5.432          | 5.184           |
| meds_reported:9013                          | FERROUS GLUCONATE 300 MG/5 ML                      |                                             |            | 4.956      | 5.011          | 4.365           |



| Variable                           | Description                                                                                                          | Model coefficients for each case definition |               |               |                   |                    |
|------------------------------------|----------------------------------------------------------------------------------------------------------------------|---------------------------------------------|---------------|---------------|-------------------|--------------------|
|                                    |                                                                                                                      | by ICD-9<br>code                            | by EIA<br>(+) | by PCR<br>(+) | EIA or<br>PCR (+) | by any<br>of these |
|                                    | (33.7 MG IRON) ELIXIR                                                                                                |                                             |               |               |                   |                    |
| problem_list:403.00                | Hypertensive chronic kidney disease, malignant, with chronic kidney disease stage I through stage IV, or unspecified |                                             |               | 4.668         | 4.458             | 4.236              |
| surgery_cases:GASTRIC BYPASS       |                                                                                                                      |                                             |               | 4.579         | 4.375             | 4.149              |
| problem_list:156.9                 | Malignant neoplasm of biliary tract, part unspecified site                                                           |                                             |               | 4.524         | 4.736             | 4.495              |
| meds_administered:8994             | AMOXICILLIN 400 MG-POTASSIUM CLAVULANATE 57 MG/5 ML ORAL SUSPENSION                                                  |                                             |               | 4.498         | 4.404             | 4.122              |
| problem_list:512.84                | Other air leak                                                                                                       |                                             |               | 4.465         | 3.395             | 3.265              |
| meds_reported:400699               | TIGECYCLINE 50 MG/50 ML NS IVPB                                                                                      |                                             |               | 4.355         | 4.634             | 4.307              |
| meds_reported:96686                | ATELVIA ORAL                                                                                                         |                                             |               | 4.123         | 4.515             | 4.353              |
| meds_reported:31250                | MENTHOL 1.4 % ADHESIVE PATCH                                                                                         |                                             |               | 4.042         | 4.244             | 4.224              |
| meds_reported:18521                | AMPHOTERICIN B LIPOSOME 50 MG INTRAVENOUS SUSPENSION                                                                 |                                             |               | 3.951         | 2.876             | 2.899              |
| meds_reported:83394                | RENO CAPS 1 MG CAPSULE                                                                                               |                                             |               | 3.907         | 4.199             | 4.031              |
| meds_reported:4860                 | PE-SHARK LIVER OIL-COCOA BUTTR 0.25 %-3 % RECTAL SUPPOSITORY                                                         |                                             |               | 3.716         | 3.994             | 3.903              |
| problem_list:286.7                 | Acquired coagulation factor deficiency                                                                               |                                             |               | 3.711         | 4.303             | 4.228              |
| problem_list:864.05                | Injury to liver without mention of open wound into cavity laceration, unspecified                                    |                                             |               | 3.619         | 4.047             | 3.763              |
| meds_reported:92784                | COLLAGENASE CLOSTRIDIUM HIST. TOP                                                                                    |                                             |               | 3.461         | 3.584             | 3.383              |
| meds_reported:6355                 | PARICALCITOL 5 MCG/ML IV SOLUTION                                                                                    |                                             |               | 3.457         | 3.670             | 3.632              |
| meds_reported:2644                 | OXYCODONE-ACETAMINOPHEN 5 MG-500 MG TAB                                                                              |                                             |               | 3.444         | 3.816             | 3.435              |
| surgery_cases:VAD PROCEDURE        |                                                                                                                      |                                             |               | 3.416         | 1.921             | 1.813              |
| meds_reported:5737                 | GALANTAMINE 4 MG TAB                                                                                                 |                                             |               | 3.320         | 3.982             | 3.836              |
| problem_list:595.2                 | Other chronic cystitis                                                                                               |                                             |               | 3.285         | 3.388             | 3.164              |
| problem_list:746.5                 | Congenital mitral stenosis                                                                                           |                                             |               | 3.265         | 3.539             | 2.947              |
| meds_reported:79686                | PROTEIN SUPPLEMENT ORAL LIQUID                                                                                       |                                             |               | 3.229         | 3.494             | 3.481              |
| meds_reported:60225                | SENNA-S ORAL                                                                                                         |                                             |               | 3.195         | 3.418             | 3.395              |
| meds_administered:9956             | POTASSIUM IODIDE 1 GRAM/ML ORAL SOLN                                                                                 |                                             |               | 3.130         | 3.366             | 3.106              |
| surgery_cases:HEART TRANSPLANT/ADT |                                                                                                                      |                                             |               | 3.130         | 2.168             | 2.052              |
| surgery_cases:OMENECTOMY           |                                                                                                                      |                                             |               | 3.120         | 3.483             | 3.328              |
| problem_list:357.4                 | Polynuropathy in other diseases classified elsewhere                                                                 |                                             |               | 3.102         | 2.417             | 2.312              |
| problem_list:327.01                | Insomnia due to medical condition classified elsewhere                                                               |                                             |               | 3.077         |                   |                    |
| meds_reported:14510                | MISOPROSTOL 100 MCG TABLET                                                                                           |                                             |               | 3.068         | 3.099             | 2.943              |
| meds_reported:14626                | CEFIXIME 400 MG TABLET                                                                                               |                                             |               | 3.014         | 3.239             | 2.883              |
| problem_list:275.5                 | Hungry bone syndrome                                                                                                 |                                             |               | 3.000         | 3.401             | 3.396              |
| meds_administered:31009            | ARTIFICIAL SALIVA (YERBA SANTA & LYLES) SPRAY                                                                        |                                             |               | 2.980         | 2.800             | 2.710              |
| meds_reported:12359                | OSELTAMIVIR 75 MG CAPSULE                                                                                            |                                             |               | 2.888         | 3.198             | 3.072              |
| meds_administered:8923             | CEFOTAXIME 1 GRAM SOLUTION FOR INJECTION                                                                             |                                             |               | 2.831         | 2.850             | 2.525              |
| meds_reported:76236                | QUETIAPINE ER 200 MG TABLET,EXTENDED RELEASE 24 HR                                                                   |                                             |               | 2.748         | 3.029             | 2.864              |
| problem_list:569.61                | Infection of colostomy or enterostomy                                                                                |                                             |               | 2.704         | 2.944             | 2.861              |
| problem_list:E930.8                | Other specified antibiotics causing adverse effects in therapeutic use                                               |                                             |               | 2.684         | 2.884             | 2.779              |
| meds_reported:98850                | ABIRATERONE 250 MG TABLET                                                                                            |                                             |               | 2.633         | 2.655             | 2.412              |
| problem_list:482.84                | Pneumonia due to Legionnaires' disease                                                                               |                                             |               | 2.595         | 3.163             | 2.757              |
| meds_reported:100352               | MORPHINE (PF) 2 MG/2 ML (1 MG/ML) IN 0.9% SODIUM CHLORIDE INJ SYRINGE                                                |                                             |               | 2.566         | 2.502             | 2.572              |
| meds_administered:496              | AMINOCAPROIC ACID 500 MG TAB                                                                                         |                                             |               | 2.564         | 2.887             | 2.553              |
| meds_reported:15848                | SIMETHICONE 125 MG CHEWABLE                                                                                          |                                             |               | 2.559         | 2.447             | 2.263              |

| Variable                           | Description                                                                  | Model coefficients for each case definition |            |            |                |                 |
|------------------------------------|------------------------------------------------------------------------------|---------------------------------------------|------------|------------|----------------|-----------------|
|                                    |                                                                              | by ICD-9 code                               | by EIA (+) | by PCR (+) | EIA or PCR (+) | by any of these |
|                                    | TAB                                                                          |                                             |            |            |                |                 |
| problem_list:730.26                | Unspecified osteomyelitis, lower leg                                         |                                             |            | 2.552      | 2.126          | 2.134           |
| meds_administered:400035           | FENTANYL INFUSION PEDS                                                       |                                             |            | 2.543      | 2.901          | 2.707           |
| problem_list:V66.2                 | Convalescence following chemotherapy                                         |                                             |            | 2.536      | 2.725          | 2.529           |
| meds_administered:7261             | VITAMIN E 50 UNIT/ML ORAL DROPS                                              |                                             |            | 2.526      | 2.825          | 2.553           |
| meds_reported:26129                | CELECOXIB 400 MG CAP                                                         |                                             |            | 2.517      | 2.785          | 2.662           |
| meds_reported:43904                | BUMETANIDE ORAL                                                              |                                             |            | 2.488      | 2.676          | 2.633           |
| problem_list:530.13                | Eosinophilic esophagitis                                                     |                                             |            | 2.429      | 3.011          | 2.707           |
| problem_list:410.31                | Acute myocardial infarction of inferoposterior wall, initial episode of care |                                             |            | 2.373      | 2.755          | 2.524           |
| problem_list:195.2                 | Malignant neoplasm of abdomen                                                |                                             |            | 2.335      | 2.213          | 2.028           |
| meds_administered:9111             | LOPERAMIDE 1 MG/5 ML ORAL LIQUID                                             |                                             |            | 2.335      | 2.665          | 2.519           |
| meds_reported:400494               | FUROSEMIDE IV BURITROL SYRINGE 10 MG/ML STERILE DIL                          |                                             |            | 2.314      | 2.368          | 2.188           |
| meds_reported:52861                | LEVORA-28 ORAL                                                               |                                             |            | 2.304      | 2.669          | 2.509           |
| meds_reported:37202                | MORPHINE 1 MG/ML IN 0.9 % SODIUM CHLORIDE INJECTABLE PUMP RESERVOIR          |                                             |            | 2.300      | 2.517          | 2.524           |
| meds_reported:52859                | LEVOPHED IV                                                                  |                                             |            | 2.288      | 2.409          | 2.500           |
| meds_reported:84060                | ESTROVEN ENERGY ORAL                                                         |                                             |            | 2.278      | 2.503          | 2.524           |
| meds_reported:45575                | CLOXACILLIN ORAL                                                             |                                             |            | 2.255      | 2.388          | 2.496           |
| meds_reported:10271                | CYCLOPHOSPHAMIDE 25 MG TAB                                                   |                                             |            | 2.213      | 2.188          | 1.986           |
| meds_administered:72791            | DARBEOETIN ALFA 60 MCG/0.3 ML IN POLYSORBATE SYRINGE                         |                                             |            | 2.154      | 1.646          | 1.423           |
| meds_reported:5676                 | SIMETHICONE 125 MG CAP                                                       |                                             |            | 2.075      | 2.527          | 2.216           |
| problem_list:628.8                 | Infertility, female, of other specified origin                               |                                             |            | 2.003      | 2.747          | 2.547           |
| problem_list:922.2                 | Contusion of abdominal wall                                                  |                                             |            | 1.952      | 2.576          | 2.424           |
| meds_administered:9407             | HYDROXYZINE HCL 10 MG/5 ML SYRUP                                             |                                             |            | 1.946      | 1.585          | 1.392           |
| meds_reported:20558                | CLINDAMYCIN 600 MG/50 ML IN DEXTROSE 5% INTRAVENOUS PIGGYBACK                |                                             |            | 1.846      | 1.938          | 1.831           |
| meds_reported:170                  | TOLTERODINE ER 2 MG 24 HR CAP                                                |                                             |            | 1.789      | 2.048          | 1.844           |
| meds_reported:8083                 | AMOXICILLIN-POTASSIUM CLAVULANATE 200 MG-28.5 MG/5 ML ORAL SUSP              |                                             |            | 1.786      | 2.124          | 1.838           |
| meds_reported:19994                | RANITIDINE 15 MG/ML SYRUP                                                    |                                             |            | 1.767      | 1.847          | 1.701           |
| abnormal_labs:1851-PHENYTOIN FREE  |                                                                              |                                             |            | 1.739      | 0.637          | 1.088           |
| problem_list:250.13                | Diabetes with ketoacidosis, type I [juvenile type], uncontrolled             |                                             |            | 1.681      | 2.092          | 1.941           |
| problem_list:952.05                | C5-C7 level with unspecified spinal cord injury                              |                                             |            | 1.670      | 1.914          | 1.793           |
| surgery_cases:EXPLORATORY LAP/RMTI |                                                                              |                                             |            | 1.639      | 0.248          | 0.122           |
| meds_reported:54501                | MIRTAZAPINE ORAL                                                             |                                             |            | 1.605      | 1.665          | 1.446           |
| problem_list:835.00                | Closed dislocation of hip, unspecified site                                  |                                             |            | 1.603      | 1.507          | 1.328           |
| meds_reported:200                  | KETOROLAC 15 MG/ML INJECTION SOLUTION                                        |                                             |            | 1.598      | 1.744          | 1.452           |
| problem_list:288.8                 | Other specified disease of white blood cells                                 |                                             |            | 1.572      | 1.350          | 1.378           |
| problem_list:289.9                 | Unspecified diseases of blood and blood-forming organs                       |                                             |            | 1.566      | 0.946          | 0.683           |
| meds_reported:45639                | CODEINE SULFATE ORAL                                                         |                                             |            | 1.484      | 1.481          | 1.179           |
| problem_list:530.20                | Ulcer of esophagus without bleeding                                          |                                             |            | 1.471      | 0.857          | 0.563           |
| meds_reported:12715                | BUMETANIDE 0.5 MG TABLET                                                     |                                             |            | 1.468      | 1.618          | 1.185           |
| meds_reported:3474                 | NYSTATIN 100,000 UNIT/G OINTMENT                                             |                                             |            | 1.458      | 1.649          | 1.525           |
| problem_list:424.2                 | Tricuspid valve disorders, specified as nonrheumatic                         |                                             |            | 1.450      | 1.621          | 1.364           |
| problem_list:V42.89                | Other specified organ or tissue replaced by transplant                       |                                             |            | 1.444      | 1.703          | 1.464           |

| Variable                     | Description                                                               | Model coefficients for each case definition |               |               |                   |                    |
|------------------------------|---------------------------------------------------------------------------|---------------------------------------------|---------------|---------------|-------------------|--------------------|
|                              |                                                                           | by ICD-9<br>code                            | by EIA<br>(+) | by PCR<br>(+) | EIA or<br>PCR (+) | by any<br>of these |
| meds_administered:400741     | FOSAPREPITANT COMBO 2                                                     |                                             |               | 1.437         | 1.967             | 2.010              |
| meds_administered:24763      | CALCIUM CHLORIDE 100 MG/ML (10<br>%) IV SYRINGE                           |                                             |               | 1.409         | 1.655             | 1.387              |
| meds_reported:98848          | ROFLUMILAST 500 MCG TABLET                                                |                                             |               | 1.394         | 1.770             | 1.581              |
| problem_list:599.1           | Urethral fistula                                                          |                                             |               | 1.379         | 0.994             | 0.984              |
| meds_administered:400403     | RASBURICASE INFUSION                                                      |                                             |               | 1.374         | 1.315             | 1.227              |
| problem_list:198.2           | Secondary malignant neoplasm of skin                                      |                                             |               | 1.372         | 0.946             | 0.872              |
| meds_reported:92591          | VANCOMYCIN 1.25 GRAM/150 ML IN<br>0.9 % SODIUM CHLORIDE<br>INTRAVENOUS    |                                             |               | 1.360         | 1.680             | 1.493              |
| problem_list:607.9           | Unspecified disorder of penis                                             |                                             |               | 1.357         | 0.961             | 0.879              |
| problem_list:444.22          | Arterial embolism and thrombosis of<br>lower extremity                    |                                             |               | 1.338         | 1.071             | 0.939              |
| meds_administered:401026     | LACOSAMIDE IVPB                                                           |                                             |               | 1.296         | 1.626             | 1.509              |
| problem_list:519.02          | Mechanical complication of<br>tracheostomy                                |                                             |               | 1.292         | 1.339             | 1.318              |
| meds_administered:10672      | PROPRANOLOL 20 MG/5 ML ORAL<br>SOLN                                       |                                             |               | 1.285         | 1.293             | 0.952              |
| meds_reported:1796           | CEFUROXIME AXETIL 250 MG<br>TABLET                                        |                                             |               | 1.283         | 1.314             | 0.978              |
| meds_administered:3727       | DRONABINOL 5 MG CAP                                                       |                                             |               | 1.229         | 1.268             | 1.176              |
| surgery_cases:LUNG LOBECTOMY |                                                                           |                                             |               | 1.207         | 1.776             | 1.565              |
| meds_reported:3392           | AMITRIPTYLINE 75 MG TABLET                                                |                                             |               | 1.182         | 1.818             | 1.606              |
| problem_list:097.1           | Latent syphilis, unspecified                                              |                                             |               | 1.176         | 0.805             | 0.608              |
| meds_reported:4432           | FLUCONAZOLE 200 MG TABLET                                                 |                                             |               | 1.172         | 0.914             | 0.817              |
| meds_reported:42645          | AZOPT OPHT                                                                |                                             |               | 1.172         | 1.011             | 0.845              |
| problem_list:730.10          | Chronic osteomyelitis, site unspecified                                   |                                             |               | 1.165         | 1.063             | 1.176              |
| meds_administered:92493      | FLUCONAZOLE IN SODIUM<br>CHLORIDE (ISO-OSM) 100 MG/50 ML<br>IV PIGGY BACK |                                             |               | 1.151         | 1.323             | 1.113              |
| meds_reported:20494          | METOPROLOL 5 MG/5 ML IV                                                   |                                             |               | 1.096         | 1.033             | 1.011              |
| meds_reported:2804           | PROPYLTHIOURACIL 50 MG TAB                                                |                                             |               | 1.091         | 1.068             | 0.997              |
| problem_list:615.9           | Unspecified inflammatory disease of<br>uterus                             |                                             |               | 1.089         | 1.423             | 1.193              |
| meds_administered:400120     | CISATRACURIUM INFUSION ADULT                                              |                                             |               | 1.080         | 1.426             | 1.355              |
| meds_administered:803        | DIPHENHYDRAMINE 12.5 MG/5 ML<br>ORAL LIQUID                               |                                             |               | 1.073         | 1.225             | 1.101              |
| problem_list:382.3           | Unspecified chronic suppurative otitis<br>media                           |                                             |               | 1.072         | 1.150             | 1.108              |
| meds_reported:15954          | EPOETIN ALFA 3,000 UNIT/ML<br>INJECTION SOLUTION                          |                                             |               | 1.056         | 1.482             | 1.236              |
| meds_administered:400174     | LABETALOL INFUSION ADULT                                                  |                                             |               | 1.050         | 1.235             | 1.072              |
| meds_reported:86560          | VANCOMYCIN 750 MG IV SOLUTION                                             |                                             |               | 1.038         | 1.332             | 1.169              |
| problem_list:707.07          | Pressure ulcer, heel                                                      |                                             |               | 1.035         | 1.062             | 0.855              |
| meds_reported:30119          | WHITE PETROLATUM 41 % TOPICAL<br>OINTMENT                                 |                                             |               | 1.033         | 1.267             | 0.824              |
| problem_list:571.1           | Acute alcoholic hepatitis                                                 |                                             |               | 1.027         | 1.118             | 0.969              |
| meds_reported:519            | GANCICLOVIR 500 MG IV SOLUTION                                            |                                             |               | 0.994         | 0.966             | 0.950              |
| meds_reported:44709          | CELLCEPT INTRAVENOUS IV                                                   |                                             |               | 0.993         | 0.968             | 0.947              |
| meds_reported:9998           | METHENAMINE HIPPURATE 1 GRAM<br>TABLET                                    |                                             |               | 0.987         | 1.233             | 1.118              |
| meds_reported:58663          | PROGRAF IV                                                                |                                             |               | 0.983         | 0.959             | 0.925              |
| meds_reported:400155         | GANCICLOVIR IVPB                                                          |                                             |               | 0.972         | 0.944             | 0.905              |
| meds_administered:400192     | MYCOPHENOLATE IVPB 1 G IN 170<br>ML D5W                                   |                                             |               | 0.970         | 1.052             | 0.905              |
| meds_administered:20175      | SODIUM CHLORIDE 3 %<br>INTRAVENOUS INJECTION<br>SOLUTION                  |                                             |               | 0.954         | 0.948             | 0.871              |
| problem_list:481             | Pneumococcal pneumonia<br>[Streptococcus pneumoniae pneumonia]            |                                             |               | 0.946         | 1.259             | 1.178              |
| problem_list:255.8           | Other specified disorders of adrenal<br>glands                            |                                             |               | 0.939         | 1.200             | 0.919              |
| meds_administered:14840      | SULFAMETHOXAZOLE-<br>TRIMETHOPRIM 200 MG-40 MG/5 ML                       |                                             |               | 0.936         | 1.058             | 1.003              |

| Variable                              | Description                                                          | Model coefficients for each case definition |            |            |                |                 |
|---------------------------------------|----------------------------------------------------------------------|---------------------------------------------|------------|------------|----------------|-----------------|
|                                       |                                                                      | by ICD-9 code                               | by EIA (+) | by PCR (+) | EIA or PCR (+) | by any of these |
|                                       | ORAL SUSP                                                            |                                             |            |            |                |                 |
| meds_reported:11695                   | PROCHLORPERAZINE 25 MG RECTAL SUPPOSITORY                            |                                             |            | 0.916      | 1.006          | 0.777           |
| meds_reported:7331                    | PROCHLORPERAZINE MALEATE 10 MG TABLET                                |                                             |            | 0.911      | 0.917          | 1.251           |
| meds_administered:2499                | CIPROFLOXACIN 750 MG TABLET                                          |                                             |            | 0.865      | 1.100          | 0.878           |
| meds_reported:4774                    | DEXTROAMPHETAMINE-AMPHETAMINE 10 MG TABLET                           |                                             |            | 0.863      | 1.092          | 0.860           |
| abnormal_labs:4622-CMV IGG            | AB DETECTION                                                         |                                             |            | 0.859      | 0.489          | 0.299           |
| meds_administered:2226                | CLONIDINE 0.1 MG/24 HR WEEKLY TRANSDERMAL PATCH                      |                                             |            | 0.853      | 0.942          | 0.906           |
| meds_administered:17464               | BROMOCRIPTINE 5 MG CAP                                               |                                             |            | 0.850      | 1.004          | 0.780           |
| problem_list:186.9                    | Malignant neoplasm of other and unspecified testis                   |                                             |            | 0.836      | 0.888          | 0.691           |
| meds_reported:20550                   | HALOPERIDOL 2 MG/ML ORAL CONCENTRATE                                 |                                             |            | 0.833      | 1.064          | 0.876           |
| problem_list:145.0                    | Malignant neoplasm of cheek mucosa                                   |                                             |            | 0.830      | 1.300          | 1.058           |
| meds_administered:700037              | ALBUMIN, HUMAN 5 % IV (APHERESIS) (7372)                             |                                             |            | 0.825      | 1.225          | 1.147           |
| problem_list:536.42                   | Mechanical complication of gastrostomy                               |                                             |            | 0.823      | 1.350          | 0.989           |
| meds_reported:63204                   | TYLENOL-CODEINE                                                      |                                             |            | 0.819      | 1.344          | 1.210           |
| meds_administered:83234               | SALIVA STIMULANT AGENTS COMBINATION NO.3 MUCOSAL SPRAY               |                                             |            | 0.811      | 1.227          | 1.000           |
| problem_list:571.3                    | Alcoholic liver damage, unspecified                                  |                                             |            | 0.797      | 0.498          | 0.349           |
| meds_administered:13705               | HYDROCORTISONE 100 MG/60 ML ENEMA                                    |                                             |            | 0.795      | 0.909          | 0.738           |
| problem_list:952.10                   | T1-T6 level with unspecified spinal cord injury                      |                                             |            | 0.778      | 0.421          | 0.320           |
| meds_reported:54911                   | MULTIVITAMINS W/C ORAL                                               |                                             |            | 0.772      | 0.046          |                 |
| problem_list:427.41                   | Ventricular fibrillation                                             |                                             |            | 0.768      | 0.829          | 0.703           |
| problem_list:369.60                   | Profound impairment, one eye, impairment level not further specified |                                             |            | 0.762      | 0.688          | 0.517           |
| meds_reported:16963                   | LOTEPREDNOL ETABONATE 0.5 % EYE DROPS,SUSPENSION                     |                                             |            | 0.762      | 0.816          | 0.697           |
| problem_list:279.00                   | Hypogammaglobulinemia, unspecified                                   |                                             |            | 0.748      | 0.739          | 0.616           |
| problem_list:380.14                   | Malignant otitis externa                                             |                                             |            | 0.745      | 0.868          | 0.473           |
| surgery_cases:PULMONARY               | THROMBOARTERECTOMY                                                   |                                             |            | 0.743      | 0.657          | 0.451           |
| meds_reported:72791                   | DARBEOETIN ALFA 60 MCG/0.3 ML IN POLYSORBATE SYRINGE                 |                                             |            | 0.732      | 0.837          | 0.726           |
| problem_list:728.2                    | Muscular wasting and disuse atrophy, not elsewhere classified        |                                             |            | 0.718      | 0.267          | 0.064           |
| meds_administered:400554              | METHYLENE BLUE IV INFUSION                                           |                                             |            | 0.709      | 1.483          | 1.386           |
| problem_list:726.4                    | Enthesopathy of wrist and carpus                                     |                                             |            | 0.707      | 0.384          | 0.305           |
| problem_list:E849.0                   | Home accidents                                                       |                                             |            | 0.701      | 1.009          | 0.833           |
| meds_administered:2804                | PROPYLTHIOURACIL 50 MG TAB                                           |                                             |            | 0.690      | 0.636          | 0.558           |
| meds_administered:6521                | GABAPENTIN 250 MG/5 ML ORAL SOLUTION                                 |                                             |            | 0.683      | 0.653          | 0.408           |
| abnormal_labs:307-WB CREATININE - ART |                                                                      |                                             |            | 0.675      | 0.204          | 0.086           |
| problem_list:V10.43                   | Personal history of malignant neoplasm of ovary                      |                                             |            | 0.675      | 1.104          | 0.871           |
| problem_list:790.1                    | Elevated sedimentation rate                                          |                                             |            | 0.672      | 0.573          | 0.327           |
| problem_list:V58.2                    | Blood transfusion, without reported diagnosis                        |                                             |            | 0.666      | 0.650          | 0.519           |
| meds_administered:400408              | SODIUM CHLORIDE 2% WITHOUT ADDITIVES                                 |                                             |            | 0.662      | 0.748          | 0.659           |
| meds_reported:55664                   | NIFEDIPINE ORAL                                                      |                                             |            | 0.658      | 0.814          | 0.687           |
| problem_list:V45.09                   | Other specified cardiac device in situ                               |                                             |            | 0.648      | 1.759          | 1.721           |
| meds_administered:4397                | BRINZOLAMIDE 1 % EYE DROPS, SUSP                                     |                                             |            | 0.648      | 0.828          | 0.691           |
| meds_reported:4633                    | POLYVINYL ALCOHOL 1.4 % EYE DROPS                                    |                                             |            | 0.639      | 0.736          | 0.577           |
| meds_administered:20134               | DOBUTAMINE 1,000 MG/250 ML(4,000 MCG/ML) IN 5 % DEXTROSE IV          |                                             |            | 0.633      | 1.083          | 0.866           |

| Variable                          | Description                                                                                                    | Model coefficients for each case definition |            |            |                |                 |
|-----------------------------------|----------------------------------------------------------------------------------------------------------------|---------------------------------------------|------------|------------|----------------|-----------------|
|                                   |                                                                                                                | by ICD-9 code                               | by EIA (+) | by PCR (+) | EIA or PCR (+) | by any of these |
| problem_list:438.21               | Late effects of cerebrovascular disease, hemiplegia affecting dominant side                                    |                                             |            | 0.625      | 0.517          | 0.240           |
| meds_reported:13223               | DIPHENHYDRAMINE 12.5 MG/5 ML ELIXIR                                                                            |                                             |            | 0.615      | 0.827          | 0.513           |
| meds_reported:16045               | MEXILETINE 200 MG CAPSULE                                                                                      |                                             |            | 0.606      | 0.865          | 0.734           |
| problem_list:204.10               | Chronic lymphoid leukemia, without mention of having achieved remission                                        |                                             |            | 0.594      | 0.561          | 0.421           |
| problem_list:V49.70               | Unspecified level lower limb amputation status                                                                 |                                             |            | 0.574      | 0.037          |                 |
| problem_list:571.6                | Biliary cirrhosis                                                                                              |                                             |            | 0.573      | 0.537          | 0.381           |
| problem_list:924.10               | Contusion of lower leg                                                                                         |                                             |            | 0.569      | 0.243          | 0.217           |
| meds_administered:66106           | LIDOCAINE (PF) 4 MG/ML (0.4 %) IN 5 % DEXTROSE IV                                                              |                                             |            | 0.566      | 0.573          | 0.461           |
| meds_administered:400271          | AMPICILLIN-SULBACTAM IV SYRINGE 30 MG/ML NS                                                                    |                                             |            | -0.564     | -0.799         | -0.738          |
| problem_list:852.21               | Subdural hemorrhage following injury without mention of open intracranial wound, with no loss of consciousness |                                             |            | -0.563     | -1.777         | -1.716          |
| meds_administered:400325          | PAMIDRONATE INFUSION                                                                                           |                                             |            | 0.560      | 0.533          | 0.379           |
| problem_list:785.4                | Gangrene                                                                                                       |                                             |            | 0.547      | 0.630          | 0.497           |
| meds_reported:15976               | PSEUDOEPHEDRINE 30 MG TABLET                                                                                   |                                             |            | 0.545      | 0.976          | 0.755           |
| problem_list:995.91               | Sepsis                                                                                                         |                                             |            | 0.541      | 0.609          | 0.546           |
| meds_administered:28449           | LEVOFLOXACIN 250 MG/50 ML IN 5 % DEXTROSE INTRAVENOUS PIGGYBACK                                                |                                             |            | 0.528      | 0.609          | 0.499           |
| meds_administered:17395           | MANNITOL 20 % INTRAVENOUS SOLUTION                                                                             |                                             |            | 0.506      | 0.661          | 0.614           |
| meds_administered:400013          | CEFOTAXIME IVPB                                                                                                |                                             |            | 0.504      | 0.389          | 0.182           |
| meds_administered:16045           | MEXILETINE 200 MG CAPSULE                                                                                      |                                             |            | 0.501      | 0.892          | 0.649           |
| meds_reported:79962               | POTASSIUM & SODIUM PHOSPHATES 280 MG-160 MG-250 MG ORAL POWDER PACKET                                          |                                             |            | -0.484     | -1.459         | -1.291          |
| meds_administered:400367          | CISATRACURIUM INFUSION PEDS                                                                                    |                                             |            | -0.472     | -0.776         | -0.642          |
| meds_administered:345             | OCTREOTIDE ACETATE 100 MCG/ML INJECTION SOLUTION                                                               |                                             |            | 0.471      | 0.535          | 0.379           |
| meds_reported:83234               | SALIVA STIMULANT AGENTS COMBINATION NO.3 MUCOSAL SPRAY                                                         |                                             |            | 0.466      | 0.467          | 0.460           |
| meds_administered:400366          | AMIODARONE IV INFUSION PEDS                                                                                    |                                             |            | -0.455     | -0.692         | -0.549          |
| problem_list:733.13               | Pathologic fracture of vertebrae                                                                               |                                             |            | 0.454      | 0.581          | 0.299           |
| meds_reported:12589               | LEUPROLIDE (3 MONTH) 22.5 MG IM SYRINGE KIT                                                                    |                                             |            | 0.452      | 0.697          | 0.424           |
| meds_administered:400191          | MULTIVITAMIN IVPB                                                                                              |                                             |            | 0.445      | 0.622          | 0.472           |
| meds_administered:400629          | CEFEPIME 2 G IVPB                                                                                              |                                             |            | 0.430      | 0.381          | 0.394           |
| meds_administered:6258            | BACITRACIN 500 UNIT/GRAM TOPICAL OINTMENT                                                                      |                                             |            | 0.425      | 0.804          | 0.600           |
| problem_list:446.4                | Wegener's granulomatosis                                                                                       |                                             |            | 0.421      | 0.229          |                 |
| meds_reported:20601               | SIMETHICONE 80 MG CHEWABLE TABLET                                                                              |                                             |            | 0.405      | 0.318          | 0.302           |
| meds_administered:83363           | CEFEPIME 1 GRAM/50 ML IN DEXTROSE (ISO-OSMOTIC) INTRAVENOUS PIGGYBACK                                          |                                             |            | 0.395      | 0.399          | 0.374           |
| meds_administered:400587          | DIGOXIN IVPB                                                                                                   |                                             |            | 0.390      | 0.402          | 0.265           |
| surgery_cases:EXPLORATORY LAP/GYN |                                                                                                                |                                             |            | 0.387      |                |                 |
| meds_reported:1162                | BICALUTAMIDE 50 MG TABLET                                                                                      |                                             |            | 0.385      | 0.624          | 0.463           |
| problem_list:146.9                | Malignant neoplasm of oropharynx, unspecified site                                                             |                                             |            | 0.384      | 0.566          | 0.433           |
| meds_reported:400299              | CEFAZOLIN IN D5W 100 ML IVPB                                                                                   |                                             |            | 0.379      | 0.026          |                 |
| meds_reported:17762               | GENTAMICIN 40 MG/ML INJECTION SOLUTION                                                                         |                                             |            | -0.366     |                |                 |
| meds_administered:400577          | LEVETIRACETAM IV BURITROL SYRINGE 50 MG/ML NS                                                                  |                                             |            | -0.365     | -0.548         | -0.400          |
| meds_administered:400111          | CEFEPIME 1 G IVPB                                                                                              |                                             |            | 0.363      | 0.395          | 0.384           |
| meds_reported:8256                | ACYCLOVIR 800 MG TABLET                                                                                        |                                             |            | 0.362      | 0.617          | 0.561           |
| meds_reported:14971               | PRAMIPEXOLE 0.25 MG TABLET                                                                                     |                                             |            | 0.359      | 0.457          | 0.216           |

| Variable                                | Description                                                                                                  | Model coefficients for each case definition |            |            |                |                 |
|-----------------------------------------|--------------------------------------------------------------------------------------------------------------|---------------------------------------------|------------|------------|----------------|-----------------|
|                                         |                                                                                                              | by ICD-9 code                               | by EIA (+) | by PCR (+) | EIA or PCR (+) | by any of these |
| problem_list:583.9                      | Nephritis and nephropathy, not specified as acute or chronic, with unspecified pathological lesion in kidney |                                             |            | 0.352      | 0.324          | 0.184           |
| surgery_cases:TOE AMPUTATION/VASC       |                                                                                                              |                                             |            | 0.346      | 0.380          | 0.202           |
| meds_administered:400711                | CASPOFUNGIN IVPB 250 ML NS                                                                                   |                                             |            | 0.344      | 0.200          | 0.108           |
| meds_reported:47                        | AMANTADINE 50 MG/5 ML SYRUP                                                                                  |                                             |            | 0.335      | 0.434          | 0.323           |
| problem_list:V55.3                      | Attention to colostomy                                                                                       |                                             |            | 0.333      |                | 0.026           |
| meds_reported:11670                     | ASCORBIC ACID 250 MG TABLET                                                                                  |                                             |            | 0.315      | 0.596          | 0.214           |
| meds_administered:20832                 | CIPROFLOXACIN IN D5W 200 MG/100 ML IV PIGGY BACK                                                             |                                             |            | 0.315      | 0.451          | 0.332           |
| problem_list:V17.49                     | Family history of other cardiovascular diseases                                                              |                                             |            | 0.311      | 0.532          | 0.418           |
| meds_reported:15395                     | OXYCODONE ER 10 MG TABLET,EXTENDED RELEASE,12 HR                                                             |                                             |            | 0.311      | 0.357          | 0.278           |
| meds_reported:53224                     | LORAZEPAM ORAL                                                                                               |                                             |            | 0.311      | 0.367          | 0.215           |
| meds_administered:37780                 | MESALAMINE 1,000 MG RECTAL SUPPOSITORY                                                                       |                                             |            | 0.300      | 0.328          |                 |
| problem_list:730.27                     | Unspecified osteomyelitis, ankle and foot                                                                    |                                             |            | 0.298      | 0.251          | 0.005           |
| problem_list:698.9                      | Unspecified pruritic disorder                                                                                |                                             |            | 0.294      | 0.335          | 0.229           |
| problem_list:707.03                     | Pressure ulcer, lower back                                                                                   |                                             |            | 0.294      | 0.015          | 0.047           |
| meds_reported:19377                     | DOXYCYCLINE HYCLATE 100 MG TABLET                                                                            |                                             |            | 0.294      | 0.806          | 0.427           |
| meds_reported:17767                     | LEVOFLOXACIN 750 MG TABLET                                                                                   |                                             |            | 0.285      | 0.481          | 0.362           |
| meds_administered:11625                 | PHENYTOIN SODIUM 50 MG/ML IV                                                                                 |                                             |            | 0.284      | 0.277          | 0.188           |
| problem_list:576.1                      | Cholangitis                                                                                                  |                                             |            | 0.283      | 0.128          |                 |
| problem_list:153.3                      | Malignant neoplasm of sigmoid colon                                                                          |                                             |            | 0.279      | 0.158          | 0.087           |
| meds_reported:7262                      | SENNOSIDES 8.8 MG/5 ML SYRUP                                                                                 |                                             |            | -0.277     | -0.710         | -0.693          |
| problem_list:719.96                     | Unspecified disorder of joint, lower leg                                                                     |                                             |            | 0.276      | 0.431          | 0.250           |
| abnormal_labs:877-C REACTIVE PROTEIN HS |                                                                                                              |                                             |            | 0.276      | 0.036          | 0.022           |
| meds_administered:400078                | ACYCLOVIR IVPB                                                                                               |                                             |            | 0.275      | 0.248          | 0.106           |
| problem_list:342.90                     | Hemiplegia, unspecified, affecting unspecified side                                                          |                                             |            | 0.273      | 0.152          | 0.017           |
| meds_administered:400216                | THIAMINE IVPB                                                                                                |                                             |            | 0.272      | 0.330          | 0.239           |
| abnormal_labs:2695-BASOPHIL             |                                                                                                              |                                             |            | 0.270      | 0.059          |                 |
| problem_list:996.66                     | Infection and inflammatory reaction due to internal joint prosthesis                                         |                                             |            | 0.268      | 0.460          | 0.385           |
| meds_administered:14510                 | MISOPROSTOL 100 MCG TABLET                                                                                   |                                             |            | 0.262      | 0.613          | 0.594           |
| meds_reported:17971                     | DILTIAZEM 30 MG TAB                                                                                          |                                             |            | 0.260      | 0.372          | 0.262           |
| meds_administered:39589                 | CHLORHEXIDINE GLUCONATE 0.12 % MOUTHWASH                                                                     |                                             |            | 0.255      | 0.329          | 0.303           |
| meds_administered:571                   | DOCUSATE SODIUM 50 MG/5 ML ORAL LIQUID                                                                       |                                             |            | 0.248      | 0.204          | 0.216           |
| problem_list:783.41                     | Failure to thrive                                                                                            |                                             |            | 0.246      | 0.290          | 0.172           |
| problem_list:868.01                     | Injury to other intra-abdominal organs without mention of open wound into cavity, adrenal gland              |                                             |            | -0.241     | -0.981         | -1.122          |
| meds_reported:15829                     | SODIUM DI- AND MONOPHOSPHATE-K PHOSPHATE MONO 250 MG TABLET                                                  |                                             |            | 0.232      | 0.249          | 0.230           |
| meds_administered:25445                 | DEXTROSE 10% IN WATER (D10W) IV SOLN                                                                         |                                             |            | 0.231      | 0.100          |                 |
| meds_administered:400054                | NITROPRUSSIDE INFUSION ADULT                                                                                 |                                             |            | 0.230      | 0.262          | 0.152           |
| meds_reported:45678                     | COLACE ORAL                                                                                                  |                                             |            | 0.226      | 0.218          | 0.147           |
| meds_administered:400929                | PANTOPRAZOLE 80MG IV IN NS 100 ML IV INFUSION                                                                |                                             |            | 0.219      | 0.246          | 0.258           |
| problem_list:593.4                      | Other ureteric obstruction                                                                                   |                                             |            | 0.210      | 0.552          | 0.339           |
| abnormal_labs:1199-VANCOMYCIN TROUGH    |                                                                                                              |                                             |            | 0.201      | 0.328          | 0.268           |
| meds_administered:400302                | CYTARABINE INFUSION                                                                                          |                                             |            | 0.197      | 0.346          | 0.098           |
| meds_reported:35104                     | MIRTAZAPINE 7.5 MG TABLET                                                                                    |                                             |            | 0.193      | 0.289          | 0.208           |
| problem_list:786.02                     | Orthopnea                                                                                                    |                                             |            | 0.187      |                |                 |
| meds_reported:16193                     | B COMPLEX-VITAMIN C-FOLIC ACID 0.8 MG TABLET                                                                 |                                             |            | 0.181      | 0.252          | 0.242           |
| meds_reported:38291                     | IBANDRONATE 150 MG TABLET                                                                                    |                                             |            | 0.176      | 0.199          | 0.090           |

| Variable                                      | Description                                                                                                  | Model coefficients for each case definition |               |               |                   |                    |
|-----------------------------------------------|--------------------------------------------------------------------------------------------------------------|---------------------------------------------|---------------|---------------|-------------------|--------------------|
|                                               |                                                                                                              | by ICD-9<br>code                            | by EIA<br>(+) | by PCR<br>(+) | EIA or<br>PCR (+) | by any<br>of these |
| problem_list:607.89                           | Other specified disorders of penis                                                                           |                                             |               | 0.172         | 0.117             |                    |
| problem_list:198.5                            | Secondary malignant neoplasm of bone and bone marrow                                                         |                                             |               | 0.172         | 0.183             | 0.056              |
| surgery_cases:NEPHRECTOMY/RADICAL             |                                                                                                              |                                             |               | 0.170         | 0.221             | 0.020              |
| meds_reported:1093                            | MESALAMINE ER 250 MG CAPSULE,EXTENDED RELEASE                                                                |                                             |               | 0.169         | 0.114             | 0.020              |
| abnormal_labs:1111-BILIRUBIN DIRECT           |                                                                                                              |                                             |               | 0.163         | 0.079             | 0.058              |
| meds_administered:37547                       | PALIFERMIN 6.25 MG INTRAVENOUS SOLUTION                                                                      |                                             |               | -0.159        | -0.603            |                    |
| surgery_cases:RETRO-PERITONEAL RESECTION      |                                                                                                              |                                             |               | 0.158         |                   |                    |
| meds_administered:400136                      | DESMOPRESSIN IVPB                                                                                            |                                             |               | 0.157         | 0.132             | 0.101              |
| meds_administered:5737                        | GALANTAMINE 4 MG TAB                                                                                         |                                             |               | 0.157         |                   |                    |
| meds_reported:7310                            | BACITRACIN ZINC 500 UNIT/GRAM OINTMENT                                                                       |                                             |               | 0.153         |                   |                    |
| meds_reported:6311                            | DIPHENOXYLATE-ATROPINE 2.5 MG-0.025 MG TABLET                                                                |                                             |               | 0.152         | 0.154             | 0.307              |
| meds_administered:400585                      | PROPOFOL INFUSION                                                                                            |                                             |               | 0.147         | 0.146             | 0.114              |
| meds_administered:5344                        | METHYLDOPA 250 MG TABLET                                                                                     |                                             |               | 0.145         | 0.556             | 0.389              |
| surgery_cases:PROSTATECTOMY/RADICAL           |                                                                                                              |                                             |               | 0.144         | 0.016             |                    |
| meds_administered:97831                       | VANCOMYCIN 750 MG/150 ML IV IN DEXTROSE (ISO-OS) INTRAVENOUS PIGGYBACK                                       |                                             |               | 0.142         | 0.160             | 0.046              |
| meds_reported:15670                           | DICLOFENAC 75 MG TAB, DELAYED RELEASE                                                                        |                                             |               | 0.141         | 0.367             | 0.219              |
| meds_administered:13962                       | FUROSEMIDE 40 MG/5 ML ORAL SOLUTION                                                                          |                                             |               | 0.141         |                   |                    |
| meds_administered:19020                       | CLOTRIMAZOLE 1 % TOPICAL CREAM                                                                               |                                             |               | 0.136         | 0.208             | 0.032              |
| problem_list:583.81                           | Nephritis and nephropathy, not specified as acute or chronic, in diseases classified elsewhere               |                                             |               | 0.132         | 0.052             |                    |
| meds_administered:2209                        | CEFEPIME 1 GRAM SOLUTION FOR INJECTION                                                                       |                                             |               | 0.125         | 0.200             | 0.112              |
| abnormal_labs:2803-PROTEIN                    |                                                                                                              |                                             |               | 0.124         | 0.098             | 0.071              |
| meds_reported:38726                           | PARICALCITOL 1 MCG CAPSULE                                                                                   |                                             |               | 0.122         | 0.230             | 0.048              |
| meds_administered:7262                        | SENNOSIDES 8.8 MG/5 ML SYRUP                                                                                 |                                             |               | 0.122         | 0.073             |                    |
| meds_administered:400924                      | BORTEZOMIB INJECTION 2.5 MG/ML NS                                                                            |                                             |               | 0.121         | 0.144             | 0.228              |
| meds_administered:7424                        | ALLOPURINOL 100 MG TABLET                                                                                    |                                             |               | 0.120         | 0.094             | 0.041              |
| meds_administered:16568                       | DIGOXIN 125 MCG TAB                                                                                          |                                             |               | 0.119         | 0.141             | 0.107              |
| problem_list:405.91                           | Unspecified renovascular hypertension                                                                        |                                             |               | 0.119         | 0.370             | 0.132              |
| meds_reported:5292                            | PREDNISON 5 MG TABLET                                                                                        |                                             |               | 0.118         | 0.132             | 0.139              |
| meds_administered:6676                        | ROCURONIUM 10 MG/ML IV                                                                                       |                                             |               | -0.118        | -0.161            | -0.123             |
| meds_administered:400933                      | PANTOPRAZOLE 40 MG IN NS 50 ML                                                                               |                                             |               | 0.113         | 0.073             | 0.051              |
| abnormal_labs:2694-EOSINOPHIL                 |                                                                                                              |                                             |               | 0.113         | 0.007             |                    |
| meds_administered:15122                       | LIDOCAINE 2 % MUCOSAL SOLN                                                                                   |                                             |               | 0.112         | 0.252             | 0.146              |
| problem_list:447.8                            | Other specified disorders of arteries and arterioles                                                         |                                             |               | 0.112         | 0.299             | 0.082              |
| problem_list:294.8                            | Other persistent mental disorders due to conditions classified elsewhere                                     |                                             |               | 0.112         |                   |                    |
| meds_reported:12119                           | LACTULOSE 10 GRAM ORAL PACKET                                                                                |                                             |               | 0.111         | 0.236             | 0.165              |
| meds_reported:63194                           | TYLENOL ORAL                                                                                                 |                                             |               | 0.109         | 0.183             |                    |
| meds_administered:400039                      | HYDROMORPHONE INFUSION                                                                                       |                                             |               | -0.105        | -1.288            | -1.048             |
| meds_administered:107901                      | NIMODIPINE 60 MG/20 ML ORAL SOLUTION                                                                         |                                             |               | 0.104         | 0.143             | 0.085              |
| meds_administered:400018                      | VANCOMYCIN >500 MG D5W                                                                                       |                                             |               | 0.103         | 0.127             | 0.103              |
| problem_list:203.00                           | Multiple myeloma, without mention of having achieved remission                                               |                                             |               | 0.102         | 0.131             | 0.072              |
| meds_administered:400657                      | FOLIC ACID IVPB                                                                                              |                                             |               | 0.096         | 0.094             | 0.050              |
| surgery_cases:ILEOCOLIC RESECTION/LAPAROSCOPY |                                                                                                              |                                             |               | 0.093         |                   |                    |
| meds_administered:400177                      | LEVETIRACETAM IVPB                                                                                           |                                             |               | 0.092         | 0.090             | 0.007              |
| problem_list:795.02                           | Papanicolaou smear of cervix with atypical squamous cells cannot exclude high grade squamous intraepithelial |                                             |               | 0.089         | 0.238             | 0.088              |

| Variable                             | Description                                                                        | Model coefficients for each case definition |               |               |                   |                    |
|--------------------------------------|------------------------------------------------------------------------------------|---------------------------------------------|---------------|---------------|-------------------|--------------------|
|                                      |                                                                                    | by ICD-9<br>code                            | by EIA<br>(+) | by PCR<br>(+) | EIA or<br>PCR (+) | by any<br>of these |
|                                      | lesion (ASC-H)                                                                     |                                             |               |               |                   |                    |
| problem_list:239.5                   | Neoplasm of unspecified nature of other genitourinary organs                       |                                             |               | 0.087         | 0.131             |                    |
| meds_administered:9311               | LEVOTHYROXINE 100 MCG TABLET                                                       |                                             |               | 0.087         | 0.129             | 0.100              |
| meds_reported:17249                  | IPRATROPIUM-ALBUTEROL 18 MCG-103 MCG/ACTUATION AEROSOL INHALER                     |                                             |               | 0.087         | 0.051             |                    |
| abnormal_labs:3498-APPEARANCE        |                                                                                    |                                             |               | 0.086         | 0.049             | 0.057              |
| problem_list:456.21                  | Esophageal varices in diseases classified elsewhere, without mention of bleeding   |                                             |               | 0.080         | 0.341             | 0.203              |
| meds_reported:14090                  | METOPROLOL TARTRATE 50 MG TAB                                                      |                                             |               | 0.077         | 0.123             | 0.052              |
| abnormal_labs:2806-BILIRUBIN         |                                                                                    |                                             |               | 0.077         |                   |                    |
| meds_administered:9699               | ALBUMIN, HUMAN 25 % IV                                                             |                                             |               | 0.076         | 0.024             |                    |
| meds_reported:4812                   | CLONAZEPAM 0.5 MG TAB                                                              |                                             |               | 0.076         | 0.052             |                    |
| meds_administered:15914              | FOLIC ACID 1 MG TABLET                                                             |                                             |               | 0.073         | 0.021             | 0.015              |
| problem_list:434.11                  | Cerebral embolism with cerebral infarction                                         |                                             |               | 0.073         | 0.351             | 0.151              |
| meds_reported:58792                  | PROSTAT ORAL                                                                       |                                             |               | 0.071         |                   |                    |
| meds_administered:400048             | PANTOPRAZOLE 40MG IV IN NS                                                         |                                             |               | 0.069         | 0.059             |                    |
| meds_administered:1312               | NYSTATIN 100,000 UNIT/ML ORAL SUSP                                                 |                                             |               | 0.067         | 0.002             |                    |
| abnormal_labs:4363-WB K - VEN (POCT) |                                                                                    |                                             |               | 0.064         |                   |                    |
| meds_administered:11735              | BACLOFEN 10 MG TAB                                                                 |                                             |               | 0.064         | 0.051             | 0.081              |
| abnormal_labs:1112-BILIRUBIN TOTAL   |                                                                                    |                                             |               | 0.063         | 0.012             | 0.006              |
| meds_administered:400603             | CALCIUM CHLORIDE IV SYRINGE 20 MG/ML NS                                            |                                             |               | -0.063        | -0.034            | -0.252             |
| abnormal_labs:2615-BASOPHIL          |                                                                                    |                                             |               | 0.058         |                   |                    |
| meds_administered:39026              | CEFTRIAOXONE 1 GRAM/50 ML IN DEXTROSE (ISO-OSMOT) INTRAVENOUS PIGGYBACK            |                                             |               | 0.058         | 0.017             |                    |
| meds_administered:623                | ISOSORBIDE DINITRATE 10 MG TAB                                                     |                                             |               | 0.058         | 0.219             | 0.100              |
| meds_administered:400298             | CARMUSTINE INFUSION                                                                |                                             |               | 0.053         | 0.108             |                    |
| meds_administered:12204              | PANTOPRAZOLE 40 MG TAB, DELAYED RELEASE                                            |                                             |               | 0.052         | 0.047             | 0.028              |
| problem_list:V42.2                   | Heart valve replaced by transplant                                                 |                                             |               | 0.051         | 0.392             | 0.245              |
| abnormal_labs:1151-URIC ACID         |                                                                                    |                                             |               | 0.050         |                   |                    |
| meds_administered:8829               | SODIUM BICARBONATE 1 MEQ/ML (8.4 %) INTRAVENOUS SOLUTION                           |                                             |               | 0.050         |                   | 0.032              |
| meds_reported:400585                 | PROPOFOL INFUSION                                                                  |                                             |               | 0.049         |                   |                    |
| meds_reported:10764                  | NITROGLYCERIN 0.4 MG/HR TRANSDERM 24 HR PATCH                                      |                                             |               | 0.044         |                   |                    |
| problem_list:V44.8                   | Other artificial opening status                                                    |                                             |               | 0.041         |                   |                    |
| meds_administered:76121              | MAGNESIUM SULFATE IN 0.9 % SOD.CHLORIDE 1 GRAM/50 ML IV                            |                                             |               | 0.040         | 0.013             |                    |
| meds_administered:10027              | SODIUM POLYSTYRENE SULFONATE 15 GRAM/60 ML ORAL SUSPENSION                         |                                             |               | 0.037         | 0.007             |                    |
| meds_reported:1131                   | HYDROXYUREA 500 MG CAPSULE                                                         |                                             |               | 0.037         | 0.707             | 0.539              |
| meds_reported:19553                  | FINASTERIDE 5 MG TABLET                                                            |                                             |               | 0.036         | 0.115             | 0.022              |
| problem_list:V10.87                  | Personal history of malignant neoplasm of thyroid                                  |                                             |               | 0.035         | 0.344             | 0.123              |
| meds_reported:60670                  | SOAP-COLLOIDAL OATMEAL TOP                                                         |                                             |               | -0.033        | -0.086            | -0.029             |
| abnormal_labs:112-WB SODIUM - VEN    |                                                                                    |                                             |               | 0.032         | 0.033             | 0.000              |
| problem_list:443.9                   | Peripheral vascular disease, unspecified                                           |                                             |               | 0.032         | 0.077             | 0.044              |
| meds_administered:400072             | PHENYLEPHRINE IV INFUSION ADULT                                                    |                                             |               | 0.032         | 0.227             | 0.143              |
| problem_list:995.20                  | Unspecified adverse effect of unspecified drug, medicinal and biological substance |                                             |               | 0.028         | 0.003             |                    |
| meds_reported:19176                  | CHOLECALCIFEROL (VITAMIN D3) 400 UNIT TABLET                                       |                                             |               | 0.026         | 0.107             | 0.027              |
| meds_reported:4762                   | PREDNISONE 20 MG TABLET                                                            |                                             |               | 0.025         |                   |                    |
| problem_list:571.2                   | Alcoholic cirrhosis of liver                                                       |                                             |               | 0.025         | 0.092             | 0.162              |



| Variable                             | Description                                                                           | Model coefficients for each case definition |               |               |                   |                    |
|--------------------------------------|---------------------------------------------------------------------------------------|---------------------------------------------|---------------|---------------|-------------------|--------------------|
|                                      |                                                                                       | by ICD-9<br>code                            | by EIA<br>(+) | by PCR<br>(+) | EIA or<br>PCR (+) | by any<br>of these |
| problem_list:278.01                  | Morbid obesity                                                                        |                                             |               | -0.024        | -0.089            | -0.068             |
| meds_administered:400108             | CASPOFUNGIN IVPB                                                                      |                                             |               | -0.022        | -0.503            | -0.541             |
| meds_reported:5341                   | QUETIAPINE 200 MG TABLET                                                              |                                             |               | 0.020         |                   |                    |
| meds_reported:14037                  | BUPROPION HCL 75 MG TABLET                                                            |                                             |               | 0.016         |                   |                    |
| meds_administered:400137             | DEXMEDETOMIDINE INFUSION                                                              |                                             |               | 0.016         | 0.012             |                    |
| problem_list:995.92                  | Severe sepsis                                                                         |                                             |               | -0.016        | -0.331            | -0.050             |
| meds_reported:2209                   | CEFEPIME 1 GRAM SOLUTION FOR INJECTION                                                |                                             |               | -0.016        | -0.019            | -0.003             |
| meds_administered:13235              | PREDNISON 50 MG TABLET                                                                |                                             |               | 0.014         | 0.118             |                    |
| abnormal_labs:2638-PLATELET          |                                                                                       |                                             |               | 0.014         |                   |                    |
| meds_administered:39249              | FENTANYL (PF) 25 MCG/ML IN 0.9 % SODIUM CHLORIDE INJECTION                            |                                             |               | 0.011         | 0.023             |                    |
| meds_reported:7237                   | LEVOFLOXACIN 250 MG TABLET                                                            |                                             |               | 0.009         |                   |                    |
| meds_reported:846                    | MEGESTROL 400 MG/10 ML (40 MG/ML) ORAL SUSP                                           |                                             |               | -0.009        | -0.362            | -0.281             |
| abnormal_labs:1118-CHLORIDE          |                                                                                       |                                             |               | 0.009         |                   |                    |
| abnormal_labs:4375-HCO3 - VEN (POCT) |                                                                                       |                                             |               | -0.008        | -0.004            | -0.008             |
| meds_administered:84910              | CALCIUM GLUCONATE 1 GRAM/100 ML IN DEXTROSE 5 % IV                                    |                                             |               | -0.007        | -0.746            | -0.450             |
| problem_list:518.52                  | Other pulmonary insufficiency, not elsewhere classified, following trauma and surgery |                                             |               | 0.006         |                   |                    |
| abnormal_labs:3312-pCO2 - VEN        |                                                                                       |                                             |               | 0.006         |                   |                    |
| problem_list:213.9                   | Benign neoplasm of bone and articular cartilage, site unspecified                     |                                             |               | 0.006         | 0.117             | 0.121              |
| problem_list:427.31                  | Atrial fibrillation                                                                   |                                             |               | 0.005         |                   |                    |
| meds_administered:8267               | CARVEDILOL 3.125 MG TAB                                                               |                                             |               | 0.003         | 0.033             |                    |
| meds_administered:25755              | MORPHINE 4 MG/ML SYRINGE                                                              |                                             |               | 0.002         | 0.012             |                    |
| meds_reported:55966                  | NOVOLOG SUBQ                                                                          |                                             |               | 0.001         | 0.007             |                    |
| meds_reported:88122                  | CETIRIZINE 5 MG/5 ML ORAL SOLN                                                        |                                             |               |               | -3.037            | -2.511             |
| meds_reported:1362                   | POTASSIUM CHLORIDE ER 10 MEQ CAPSULE,EXTENDED RELEASE                                 |                                             |               |               | 2.751             | 2.523              |
| problem_list:197.2                   | Secondary malignant neoplasm of pleura                                                |                                             |               |               | 1.137             | 1.046              |
| meds_administered:10433              | ACETAMINOPHEN 120 MG RECTAL SUPPOSITORY                                               |                                             |               |               | -1.032            | -1.074             |
| problem_list:619.8                   | Other specified fistulas involving female genital tract                               |                                             |               |               | -0.874            | -0.602             |
| meds_reported:46955                  | DESMOPRESSIN NASL                                                                     |                                             |               |               | -0.869            | -0.747             |
| problem_list:238.77                  | Post-transplant lymphoproliferative disorder (PTLD)                                   |                                             |               |               | -0.831            | -0.634             |
| meds_reported:45975                  | CONJ ESTROG-MEDROXYPROGEST ACE ORAL                                                   |                                             |               |               | -0.772            | -0.295             |
| meds_administered:66099              | LIDOCAINE (PF) 100 MG/5 ML (2 %) IV SYRINGE                                           |                                             |               |               | 0.710             | 0.572              |
| meds_reported:56703                  | OXCARBAZEPINE ORAL                                                                    |                                             |               |               | -0.705            | -0.580             |
| meds_reported:14370                  | ZIDOVUDINE 300 MG TAB                                                                 |                                             |               |               | 0.703             | 0.615              |
| meds_reported:13872                  | OXACILLIN 2 GRAM IV SOLUTION                                                          |                                             |               |               | -0.667            | -0.457             |
| meds_administered:1026               | IVERMECTIN 3 MG TABLET                                                                |                                             |               |               | -0.603            | -0.595             |
| meds_administered:400107             | CALCIUM CHLORIDE IVPB                                                                 |                                             |               |               | 0.525             | 0.454              |
| meds_administered:19144              | ALTEPLASE 2 MG SOLUTION FOR INJECTION                                                 |                                             |               |               | -0.517            | -0.464             |
| meds_administered:80963              | FOSPHENYTOIN 500 MG PE/10 ML INJECTION                                                |                                             |               |               | 0.508             | 0.372              |
| meds_reported:5511                   | SODIUM CHLORIDE 0.45 % INTRAVENOUS SOLUTION                                           |                                             |               |               | -0.463            | -0.952             |
| problem_list:202.00                  | Nodular lymphoma, unspecified site, extranodal and solid organ sites                  |                                             |               |               | 0.439             |                    |
| meds_reported:11625                  | PHENYTOIN SODIUM 50 MG/ML IV                                                          |                                             |               |               | -0.415            | -0.222             |
| problem_list:295.92                  | Unspecified schizophrenia, chronic                                                    |                                             |               |               | -0.396            | -0.313             |
| meds_administered:47                 | AMANTADINE 50 MG/5 ML SYRUP                                                           |                                             |               |               | -0.366            | -0.301             |
| meds_reported:88724                  | PROPOFOL (PF) 1,000 MG/100 ML (10 MG/ML) IV                                           |                                             |               |               | -0.336            | -0.139             |
| meds_reported:2826                   | GLYCOPYRROLATE 0.2 MG/ML                                                              |                                             |               |               | -0.327            | -0.106             |

| Variable                       | Description                                                                           | Model coefficients for each case definition |               |               |                   |                    |
|--------------------------------|---------------------------------------------------------------------------------------|---------------------------------------------|---------------|---------------|-------------------|--------------------|
|                                |                                                                                       | by ICD-9<br>code                            | by EIA<br>(+) | by PCR<br>(+) | EIA or<br>PCR (+) | by any<br>of these |
|                                | INJECTION                                                                             |                                             |               |               |                   |                    |
| problem_list:171.6             | Malignant neoplasm of connective and other soft tissue of pelvis                      |                                             |               |               | 0.314             | 0.349              |
| meds_reported:41686            | AMIODARONE IV                                                                         |                                             |               |               | -0.292            | -0.028             |
| problem_list:238.73            | High grade myelodysplastic syndrome lesions                                           |                                             |               |               | -0.284            | -0.207             |
| meds_administered:20384        | SODIUM CHLORIDE 4 MEQ/ML INTRAVENOUS SOLUTION                                         |                                             |               |               | -0.257            | -0.058             |
| meds_reported:45779            | COLOCORT RECT                                                                         |                                             |               |               | -0.256            | -0.127             |
| meds_administered:25765        | FILGRASTIM 300 MCG/0.5 ML INJECTION SYRINGE                                           |                                             |               |               | -0.251            | -0.109             |
| meds_reported:7856             | DIOVAN 320 MG TABLET                                                                  |                                             |               |               | -0.246            | -0.055             |
| meds_reported:98048            | RUFINAMIDE 40 MG/ML ORAL SUSPENSION                                                   |                                             |               |               | -0.244            |                    |
| problem_list:348.5             | Cerebral edema                                                                        |                                             |               |               | 0.236             | 0.006              |
| meds_administered:36638        | ZINC OXIDE-WHITE PETROLATUM 15 %-49 % TOPICAL OINTMENT                                |                                             |               |               | -0.228            | -0.155             |
| meds_reported:41180            | ALDACTONE ORAL                                                                        |                                             |               |               | 0.208             |                    |
| meds_administered:36549        | DULOXETINE 60 MG CAPSULE, DELAYED RELEASE                                             |                                             |               |               | 0.200             | 0.110              |
| meds_reported:11704            | ETHAMBUTOL 400 MG TABLET                                                              |                                             |               |               | -0.199            | -0.108             |
| meds_reported:76543            | CALCIUM CARBONATE 250 MG (625 MG) TABLET                                              |                                             |               |               | 0.185             | 0.230              |
| meds_administered:8342         | LIDOCAINE-PRILOCAINE 2.5 %-2.5 % TOPICAL CREAM                                        |                                             |               |               | 0.177             |                    |
| problem_list:578.1             | Blood in stool                                                                        |                                             |               |               | 0.176             | 0.005              |
| meds_reported:6521             | GABAPENTIN 250 MG/5 ML ORAL SOLUTION                                                  |                                             |               |               | -0.175            |                    |
| meds_reported:12511            | CHLORPROMAZINE 25 MG TAB                                                              |                                             |               |               | -0.170            |                    |
| meds_reported:43409            | BIDIL ORAL                                                                            |                                             |               |               | -0.166            |                    |
| meds_reported:103204           | XTANDI 40 MG CAPSULE                                                                  |                                             |               |               | -0.162            | -0.008             |
| meds_administered:36547        | DULOXETINE 20 MG CAP, DELAYED RELEASE                                                 |                                             |               |               | 0.149             | 0.073              |
| problem_list:277.01            | Cystic fibrosis with meconium ileus                                                   |                                             |               |               | -0.143            | -0.102             |
| meds_reported:13402            | URSODIOL 300 MG CAP                                                                   |                                             |               |               | -0.143            | -0.153             |
| meds_reported:46270            | CRITIC-AID CLEAR TOP                                                                  |                                             |               |               | -0.137            |                    |
| abnormal_labs:819-IG M QUANT   |                                                                                       |                                             |               |               | -0.134            | -0.217             |
| meds_administered:73290        | POSACONAZOLE 200 MG/5 ML (40 MG/ML) ORAL SUSP                                         |                                             |               |               | -0.130            |                    |
| meds_administered:12044        | DORNASE ALFA 1 MG/ML SOLN FOR INHALATION                                              |                                             |               |               | -0.129            | -0.147             |
| problem_list:V42.82            | Peripheral stem cells replaced by transplant                                          |                                             |               |               | -0.125            | -0.146             |
| meds_administered:17268        | BUDESONIDE DR & ER 3 MG CAP, DELAYED & EXTENDED RELEASE                               |                                             |               |               | -0.125            |                    |
| abnormal_labs:20246-EOSINOPHIL |                                                                                       |                                             |               |               | -0.120            | -0.031             |
| problem_list:188.9             | Malignant neoplasm of bladder, part unspecified                                       |                                             |               |               | 0.119             | 0.049              |
| meds_reported:7576             | FOLIC ACID 400 MCG TABLET                                                             |                                             |               |               | 0.118             |                    |
| meds_administered:400567       | TOBRAMYCIN IV BURITROL SYRINGE 40 MG/ML STERILE DIL                                   |                                             |               |               | -0.113            | -0.057             |
| meds_administered:400076       | ACETYLCYSTEINE (THIRD DOSE) IV INFUSION                                               |                                             |               |               | -0.113            | -0.079             |
| problem_list:531.50            | Chronic or unspecified gastric ulcer with perforation, without mention of obstruction |                                             |               |               | -0.111            |                    |
| meds_reported:5245             | SIMVASTATIN 10 MG TABLET                                                              |                                             |               |               | 0.109             | 0.086              |
| meds_reported:73290            | POSACONAZOLE 200 MG/5 ML (40 MG/ML) ORAL SUSP                                         |                                             |               |               | -0.103            | -0.141             |
| problem_list:428.43            | Acute on chronic combined systolic and diastolic heart failure                        |                                             |               |               | 0.100             |                    |
| meds_reported:496              | AMINOCAPROIC ACID 500 MG TAB                                                          |                                             |               |               | -0.098            |                    |
| meds_administered:78303        | FERROUS GLUCONATE 325 MG (37.5 MG IRON) TAB                                           |                                             |               |               | 0.095             |                    |

| Variable                               | Description                                                                                            | Model coefficients for each case definition |               |               |                   |                    |
|----------------------------------------|--------------------------------------------------------------------------------------------------------|---------------------------------------------|---------------|---------------|-------------------|--------------------|
|                                        |                                                                                                        | by ICD-9<br>code                            | by EIA<br>(+) | by PCR<br>(+) | EIA or<br>PCR (+) | by any<br>of these |
| meds_reported:62237                    | THERAGRAN-M ORAL                                                                                       |                                             |               |               | -0.085            | -0.083             |
| meds_reported:36256                    | RIFAXIMIN 200 MG TAB                                                                                   |                                             |               |               | -0.083            | -0.149             |
| surgery_cases:LIVER RESECTION/PARTIAL  |                                                                                                        |                                             |               |               | 0.081             | 0.096              |
| meds_reported:19195                    | TACROLIMUS 1 MG CAPSULE                                                                                |                                             |               |               | -0.080            |                    |
| meds_reported:20058                    | SPIRONOLACTONE 50 MG TAB                                                                               |                                             |               |               | -0.076            | -0.098             |
| abnormal_labs:2871-RBC                 |                                                                                                        |                                             |               |               | -0.075            |                    |
| meds_reported:26598                    | AVODART 0.5 MG CAPSULE                                                                                 |                                             |               |               | -0.074            | -0.001             |
| problem_list:568.89                    | Other specified disorders of peritoneum                                                                |                                             |               |               | 0.072             |                    |
| meds_reported:689                      | FUROSEMIDE 10 MG/ML INJECTION                                                                          |                                             |               |               | -0.070            | -0.056             |
| problem_list:719.41                    | Pain in joint, shoulder region                                                                         |                                             |               |               | -0.069            | -0.075             |
| problem_list:299.00                    | Autistic disorder, current or active state                                                             |                                             |               |               | 0.067             |                    |
| abnormal_labs:8802-ALPHA 1 GLOB        |                                                                                                        |                                             |               |               | -0.066            | -0.021             |
| meds_reported:7424                     | ALLOPURINOL 100 MG TABLET                                                                              |                                             |               |               | 0.063             |                    |
| meds_reported:13303                    | LIDOCAINE 5 % (700 MG/PATCH)<br>ADHESIVE PATCH                                                         |                                             |               |               | -0.061            | -0.083             |
| meds_administered:5831                 | TRETINOIN (CHEMOTHERAPY) 10<br>MG CAP                                                                  |                                             |               |               | -0.056            | -0.013             |
| abnormal_labs:3769-UROBILINOGEN - DSTK |                                                                                                        |                                             |               |               | -0.054            | -0.083             |
| problem_list:787.03                    | Vomiting alone                                                                                         |                                             |               |               | -0.052            | -0.049             |
| meds_reported:17263                    | WARFARIN 1 MG TAB                                                                                      |                                             |               |               | -0.050            | -0.006             |
| meds_administered:400044               | METHYLPREDNISOLONE IVPB                                                                                |                                             |               |               | -0.050            |                    |
| meds_reported:135                      | QUETIAPINE 25 MG TABLET                                                                                |                                             |               |               | -0.048            | -0.025             |
| problem_list:V43.65                    | Knee joint replacement                                                                                 |                                             |               |               | -0.047            | -0.053             |
| problem_list:780.60                    | Fever, unspecified                                                                                     |                                             |               |               | 0.047             | 0.028              |
| meds_administered:2424                 | ALBUTEROL SULFATE 2.5 MG/3 ML<br>(0.083 %) SOLUTION FOR<br>NEBULIZATION                                |                                             |               |               | -0.046            | -0.045             |
| meds_administered:17793                | ZOLPIDEM 10 MG TAB                                                                                     |                                             |               |               | -0.046            |                    |
| meds_administered:23930                | ENOXAPARIN 60 MG/0.6 ML SUB-Q<br>SYRINGE                                                               |                                             |               |               | -0.044            | -0.060             |
| problem_list:782.4                     | Jaundice, unspecified, not of newborn                                                                  |                                             |               |               | -0.044            | -0.081             |
| meds_administered:16254                | KETAMINE 50 MG/ML INJECTION<br>SOLUTION                                                                |                                             |               |               | -0.043            | -0.059             |
| problem_list:V43.3                     | Heart valve replaced by other means                                                                    |                                             |               |               | -0.042            | -0.045             |
| meds_reported:42580                    | AVAPRO ORAL                                                                                            |                                             |               |               | 0.040             |                    |
| meds_administered:113616               | OXYCODONE ER 10 MG<br>TABLET,CRUSH<br>RESISTANT,EXTENDED RELEASE 12<br>HR                              |                                             |               |               | 0.039             |                    |
| meds_administered:3931                 | CHLORPROMAZINE 100 MG TABLET                                                                           |                                             |               |               | 0.038             |                    |
| meds_reported:1217                     | ATORVASTATIN 80 MG TABLET                                                                              |                                             |               |               | -0.038            | -0.056             |
| problem_list:275.42                    | Hypercalcemia                                                                                          |                                             |               |               | 0.038             |                    |
| meds_administered:17108                | DEXAMETHASONE 4 MG/ML<br>INJECTION SOLUTION                                                            |                                             |               |               | -0.036            | -0.060             |
| problem_list:577.0                     | Acute pancreatitis                                                                                     |                                             |               |               | 0.036             | 0.053              |
| meds_reported:18790                    | LOSARTAN 100 MG TABLET                                                                                 |                                             |               |               | -0.034            | -0.051             |
| meds_administered:2863                 | CETIRIZINE 10 MG TABLET                                                                                |                                             |               |               | 0.032             |                    |
| abnormal_labs:4371-pH - VEN (POCT)     |                                                                                                        |                                             |               |               | 0.032             | 0.056              |
| meds_administered:15738                | CEFOTAXIME 2 GRAM/50 ML IN<br>DEXTROSE 5 % INTRAVENOUS<br>PIGGYBACK                                    |                                             |               |               | 0.029             |                    |
| meds_administered:16526                | HYDROCHLOROTHIAZIDE 25 MG<br>TABLET                                                                    |                                             |               |               | -0.029            | -0.052             |
| meds_reported:2042                     | LACTULOSE 10 GRAM/15 ML SYRUP                                                                          |                                             |               |               | -0.028            | -0.026             |
| meds_reported:103346                   | MORPHINE 2 MG/ML INTRAVENOUS<br>CARTRIDGE                                                              |                                             |               |               | -0.026            |                    |
| problem_list:428.33                    | Acute on chronic diastolic heart failure                                                               |                                             |               |               | 0.023             |                    |
| problem_list:250.50                    | Diabetes with ophthalmic<br>manifestations, type II or unspecified<br>type, not stated as uncontrolled |                                             |               |               | -0.022            |                    |
| problem_list:413.9                     | Other and unspecified angina pectoris                                                                  |                                             |               |               | 0.020             |                    |
| meds_reported:55912                    | NORVASC ORAL                                                                                           |                                             |               |               | -0.020            |                    |
| abnormal_labs:1233-U-COCAINE           |                                                                                                        |                                             |               |               | -0.020            | -0.041             |
| meds_administered:15395                | OXYCODONE ER 10 MG                                                                                     |                                             |               |               | -0.020            | -0.035             |

| Variable                                        | Description                                                                                                     | Model coefficients for each case definition |               |               |                   |                    |
|-------------------------------------------------|-----------------------------------------------------------------------------------------------------------------|---------------------------------------------|---------------|---------------|-------------------|--------------------|
|                                                 |                                                                                                                 | by ICD-9<br>code                            | by EIA<br>(+) | by PCR<br>(+) | EIA or<br>PCR (+) | by any<br>of these |
|                                                 | TABLET,EXTENDED RELEASE,12 HR                                                                                   |                                             |               |               |                   |                    |
| meds_administered:12359                         | OSELTAMIVIR 75 MG CAPSULE                                                                                       |                                             |               |               | -0.019            |                    |
| meds_administered:83375                         | CLEVIDIPINE 25 MG/50 ML<br>INTRAVENOUS EMULSION                                                                 |                                             |               |               | 0.018             |                    |
| abnormal_labs:309-IONIZED CA - ART WB           |                                                                                                                 |                                             |               |               | -0.018            |                    |
| meds_administered:9721                          | LEVOTHYROXINE 88 MCG TABLET                                                                                     |                                             |               |               | -0.018            |                    |
| problem_list:458.9                              | Hypotension, unspecified                                                                                        |                                             |               |               | -0.018            | -0.032             |
| meds_administered:25448                         | LINEZOLID 600 MG/300 ML IV                                                                                      |                                             |               |               | -0.017            | -0.107             |
| problem_list:338.3                              | Neoplasm related pain (acute) (chronic)                                                                         |                                             |               |               | -0.017            | -0.020             |
| meds_administered:400582                        | CUSTOM MIXTURE                                                                                                  |                                             |               |               | 0.016             |                    |
| meds_administered:300054                        | NIMODIPINE 30 MG/ML ORAL<br>SYRINGE                                                                             |                                             |               |               | -0.016            |                    |
| abnormal_labs:300-GLUCOSE (MPOCT) BY METER      |                                                                                                                 |                                             |               |               | -0.015            | -0.033             |
| meds_reported:52316                             | KEPPRA ORAL                                                                                                     |                                             |               |               | 0.014             |                    |
| problem_list:780.93                             | Memory loss                                                                                                     |                                             |               |               | -0.013            |                    |
| meds_reported:2226                              | CLONIDINE 0.1 MG/24 HR WEEKLY<br>TRANSDERMAL PATCH                                                              |                                             |               |               | -0.013            | -0.092             |
| meds_administered:98011                         | LEVETIRACETAM 1,000 MG/100 ML IN<br>SOD.CHLORIDE (ISO-OSM) IV<br>PIGGYBACK                                      |                                             |               |               | 0.013             |                    |
| abnormal_labs:4364-HEMATOCRIT-VEN (GEM - MPOCT) |                                                                                                                 |                                             |               |               | -0.013            |                    |
| meds_administered:27635                         | FILGRASTIM 480 MCG/1.6 ML<br>INJECTION                                                                          |                                             |               |               | -0.012            |                    |
| meds_administered:400073                        | OCTREOTIDE IV INFUSION ADULT                                                                                    |                                             |               |               | 0.012             |                    |
| meds_administered:5312                          | OCTREOTIDE ACETATE 50 MCG/ML<br>INJECTION                                                                       |                                             |               |               | 0.012             |                    |
| meds_reported:4791                              | ISOSORBIDE MONONITRATE ER 30<br>MG TABLET,EXTENDED RELEASE 24<br>HR                                             |                                             |               |               | -0.010            | -0.022             |
| meds_administered:27973                         | APREPITANT 125 MG CAP                                                                                           |                                             |               |               | -0.010            |                    |
| meds_administered:5499                          | NIMODIPINE 30 MG CAP                                                                                            |                                             |               |               | -0.009            | -0.014             |
| problem_list:600.90                             | Hyperplasia of prostate, unspecified,<br>without urinary obstruction and other<br>lower urinary symptoms (LUTS) |                                             |               |               | -0.008            | -0.024             |
| abnormal_labs:2111-HGB S                        |                                                                                                                 |                                             |               |               | -0.008            | -0.141             |
| problem_list:250.10                             | Diabetes with ketoacidosis, type II or<br>unspecified type, not stated as<br>uncontrolled                       |                                             |               |               | -0.008            |                    |
| meds_administered:73128                         | ZINC SULFATE 220 MG (50 MG) CAP                                                                                 |                                             |               |               | -0.007            | -0.011             |
| meds_administered:896                           | HYDRALAZINE 10 MG TABLET                                                                                        |                                             |               |               | 0.007             |                    |
| meds_administered:18020                         | DEXAMETHASONE 0.5 MG TAB                                                                                        |                                             |               |               | 0.006             | 0.058              |
| abnormal_labs:3763-GLUCOSE - DIPSTICK (MPOCT)   |                                                                                                                 |                                             |               |               | -0.006            |                    |
| abnormal_labs:4499-C REACTIVE PROTEIN           |                                                                                                                 |                                             |               |               | -0.006            |                    |
| problem_list:431                                | Intracerebral hemorrhage                                                                                        |                                             |               |               | 0.004             | 0.065              |
| problem_list:432.9                              | Unspecified intracranial hemorrhage                                                                             |                                             |               |               | -0.004            |                    |
| problem_list:348.30                             | Encephalopathy, unspecified                                                                                     |                                             |               |               | -0.003            |                    |
| meds_administered:17641                         | LEVOFLOXACIN 500 MG TAB                                                                                         |                                             |               |               | -0.003            |                    |
| meds_administered:3623                          | LIOthyRONINE 25 MCG TABLET                                                                                      |                                             |               |               | 0.003             |                    |
| meds_reported:25172                             | PRENATAL MULTIVIT-CA-MIN-FE-FA<br>TABLET                                                                        |                                             |               |               | -0.003            | -0.012             |
| problem_list:794.39                             | Other nonspecific abnormal results of<br>function study of cardiovascular system                                |                                             |               |               | -0.002            | -0.001             |
| meds_administered:4480                          | SUCRALFATE 1 GRAM TABLET                                                                                        |                                             |               |               | 0.002             |                    |
| problem_list:295.90                             | Unspecified schizophrenia, unspecified                                                                          |                                             |               |               | -0.001            | -0.023             |
| problem_list:891.0                              | Open wound of knee, leg [except thigh],<br>and ankle, without mention of<br>complication                        |                                             |               |               |                   | 0.821              |
| meds_administered:19248                         | SODIUM FLUORIDE 1.1 % DENTAL<br>GEL                                                                             |                                             |               |               |                   | -0.444             |
| problem_list:284.11                             | Antineoplastic chemotherapy induced<br>pancytopenia                                                             |                                             |               |               |                   | -0.363             |
| problem_list:E819.7                             | Motor vehicle traffic accident of<br>unspecified nature injuring pedestrian                                     |                                             |               |               |                   | -0.348             |
| problem_list:453.3                              | Other venous embolism and thrombosis                                                                            |                                             |               |               |                   | -0.345             |

| Variable                                                     | Description                                                          | Model coefficients for each case definition |               |               |                   |                    |
|--------------------------------------------------------------|----------------------------------------------------------------------|---------------------------------------------|---------------|---------------|-------------------|--------------------|
|                                                              |                                                                      | by ICD-9<br>code                            | by EIA<br>(+) | by PCR<br>(+) | EIA or<br>PCR (+) | by any<br>of these |
|                                                              | of renal vein                                                        |                                             |               |               |                   |                    |
| problem_list:459.9                                           | Unspecified circulatory system disorder                              |                                             |               |               |                   | 0.292              |
| problem_list:038.40                                          | Septicemia due to gram-negative organism, unspecified                |                                             |               |               |                   | -0.269             |
| surgery_cases:COLECTOMY/SUBTOTAL                             |                                                                      |                                             |               |               |                   | 0.259              |
| meds_reported:79246                                          | RAMIPRIL 10 MG TAB                                                   |                                             |               |               |                   | 0.254              |
| meds_reported:93893                                          | SIMETHICONE 80 MG TABLET                                             |                                             |               |               |                   | 0.190              |
| meds_reported:63649                                          | VANCOMYCIN (BULK) MISC                                               |                                             |               |               |                   | -0.139             |
| meds_administered:74499                                      | LIALDA 1.2 G TABLET,DELAYED RELEASE                                  |                                             |               |               |                   | -0.129             |
| problem_list:156.0                                           | Malignant neoplasm of gallbladder                                    |                                             |               |               |                   | 0.113              |
| meds_administered:38323                                      | ENTECAVIR 0.5 MG TABLET                                              |                                             |               |               |                   | -0.112             |
| meds_reported:85032                                          | LEVETIRACETAM 500 MG/5 ML (5 ML) ORAL SOLN                           |                                             |               |               |                   | -0.099             |
| meds_administered:9194                                       | FLUCONAZOLE IN SODIUM CHLORIDE (ISO-OSM) 200 MG/100 ML IV PIGGY BACK |                                             |               |               |                   | -0.092             |
| problem_list:263.9                                           | Unspecified protein-calorie malnutrition                             |                                             |               |               |                   | -0.073             |
| meds_reported:16133                                          | LAMIVUDINE 10 MG/ML ORAL SOLUTION                                    |                                             |               |               |                   | 0.065              |
| meds_reported:20627                                          | OXYCODONE 5 MG TABLET                                                |                                             |               |               |                   | 0.054              |
| meds_reported:8769                                           | WARFARIN 3 MG TABLET                                                 |                                             |               |               |                   | 0.050              |
| meds_administered:12134                                      | CEPHALEXIN 500 MG CAPSULE                                            |                                             |               |               |                   | 0.050              |
| meds_administered:400516                                     | FILGRASTIM IVPB                                                      |                                             |               |               |                   | 0.050              |
| surgery_cases:LIVER SEGMENT LOBECTOMY/GS                     |                                                                      |                                             |               |               |                   | 0.040              |
| meds_administered:6600                                       | TOPIRAMATE 25 MG TABLET                                              |                                             |               |               |                   | 0.031              |
| meds_reported:93464                                          | RIFAXIMIN 550 MG TABLET                                              |                                             |               |               |                   | -0.029             |
| meds_administered:6134                                       | TORSEMIDE 10 MG TABLET                                               |                                             |               |               |                   | -0.026             |
| meds_administered:85249                                      | NEBIVOLOL 20 MG TABLET                                               |                                             |               |               |                   | -0.024             |
| meds_administered:28710                                      | SODIUM CHLORIDE 0.65 % NASAL SPRAY AEROSOL                           |                                             |               |               |                   | 0.022              |
| meds_administered:29117                                      | ASCORBIC ACID 500 MG/5 ML SYRUP                                      |                                             |               |               |                   | -0.016             |
| meds_reported:2565                                           | CITALOPRAM 40 MG TABLET                                              |                                             |               |               |                   | -0.015             |
| abnormal_labs:1141-SALICYLATE                                |                                                                      |                                             |               |               |                   | -0.015             |
| abnormal_labs:4376-TOT CO2 - VEN (POCT)                      |                                                                      |                                             |               |               |                   | -0.013             |
| problem_list:716.90                                          | Arthropathy, unspecified, site unspecified                           |                                             |               |               |                   | -0.011             |
| meds_reported:2767                                           | POLYETHYLENE GLYCOL 3350 17 GRAM ORAL POWDER PACKET                  |                                             |               |               |                   | -0.009             |
| meds_administered:3590                                       | HYDROMORPHONE 50 MG/50 ML IN 0.9 % SODIUM CHLORIDE INJECTION         |                                             |               |               |                   | -0.009             |
| abnormal_labs:20244-MONOCYTE                                 |                                                                      |                                             |               |               |                   | -0.008             |
| meds_administered:6661                                       | HYDRALAZINE 25 MG TABLET                                             |                                             |               |               |                   | -0.008             |
| problem_list:298.9                                           | Unspecified psychosis                                                |                                             |               |               |                   | -0.008             |
| meds_administered:16093                                      | ALLOPURINOL 300 MG TABLET                                            |                                             |               |               |                   | -0.007             |
| meds_reported:5836                                           | METOLAZONE 5 MG TAB                                                  |                                             |               |               |                   | -0.007             |
| meds_administered:7331                                       | PROCHLORPERAZINE MALEATE 10 MG TABLET                                |                                             |               |               |                   | -0.006             |
| problem_list:650                                             | Normal delivery                                                      |                                             |               |               |                   | -0.004             |
| <b>Total number of non-zero, non-intercept coefficients:</b> |                                                                      | <b>615</b>                                  | <b>373</b>    | <b>748</b>    | <b>1020</b>       | <b>1027</b>        |
